# Supplementary material for: Transcriptional and Small RNA Responses of the White Mold Fungus Sclerotinia sclerotiorum to Infection by a Virulence-Attenuating Hypovirus
Source: PubMed Central journal article supplement (PMC6315951; doi:10.3390/v10120713), 2018-12-14
Supplement: viruses-10-00713-s001.pdf [file viruses-10-00713-s001.pdf]

**Table S1a.** Trial #1 RNA-Seq analysis of virus-free and hypovirus-transfected *Sclerotinia sclerotiorum*

|                                                       | Library      |        |              |        |                  |        |                  |        |             |        |
|-------------------------------------------------------|--------------|--------|--------------|--------|------------------|--------|------------------|--------|-------------|--------|
|                                                       | Virus-free_1 |        | Virus-free_2 |        | Virus-infected_1 |        | Virus-infected_2 |        | Total       |        |
|                                                       | Count        | %      | Count        | %      | Count            | %      | Count            | %      | Count       | %      |
| Raw reads                                             | 48,854,170   | 100.0% | 56,568,277   | 100.0% | 48,169,458       | 100.0% | 57,396,928       | 100.0% | 210,988,833 | 100.0% |
| Filtered reads                                        | 48,810,008   | 99.9%  | 56,518,010   | 99.9%  | 48,118,009       | 99.9%  | 57,341,604       | 99.9%  | 210,787,631 | 99.9%  |
| <i>S. sclerotiorum</i> genome                         |              |        |              |        |                  |        |                  |        |             |        |
| Total aligned                                         | 44,085,026   | 90.3%  | 50,724,764   | 89.8%  | 41,374,916       | 86.0%  | 50,580,960       | 88.2%  | 186,765,666 | 88.6%  |
| Unaligned                                             | 4,724,982    | 9.7%   | 5,793,246    | 10.3%  | 6,743,093        | 14.0%  | 6,760,644        | 11.8%  | 24,021,965  | 11.5%  |
| Intergenic regions (non-rRNA)                         | 13,918,285   | 28.5%  | 16,317,039   | 28.9%  | 9,354,071        | 19.4%  | 15,230,421       | 26.6%  | 54,819,816  | 25.8%  |
| Ribosomal RNA                                         | 9,150,409    | 18.7%  | 6,442,905    | 11.4%  | 3,329,107        | 6.8%   | 5,976,737        | 10.4%  | 24,899,158  | 11.8%  |
| Retrotransposons                                      | 202,264      | 0.4%   | 268,505      | 0.5%   | 251,134          | 0.5%   | 499,377          | 0.9%   | 1,221,280   | 0.6%   |
| Coding sequences                                      |              |        |              |        |                  |        |                  |        |             |        |
| Aligned                                               | 28,057,390   | 57.5%  | 36,310,362   | 64.2%  | 29,370,507       | 61.0%  | 37,649,843       | 65.7%  | 131,388,102 | 62.1%  |
| plus strand                                           | 27,285,917   | 97.3%  | 35,481,217   | 97.7%  | 28,409,529       | 96.7%  | 36,766,211       | 97.7%  | 127,942,874 | 97.3%  |
| minus strand                                          | 771,473      | 2.7%   | 829,145      | 2.3%   | 960,978          | 3.3%   | 883,632          | 2.3%   | 3,445,228   | 2.7%   |
| Unaligned                                             | 20,752,618   | 42.5%  | 20,207,648   | 35.8%  | 18,747,502       | 39.0%  | 19,691,761       | 34.3%  | 79,399,529  | 37.9%  |
| <i>Sclerotinia sclerotiorum</i> hypovirus 2L (SsHV2L) |              |        |              |        |                  |        |                  |        |             |        |
| Aligned                                               | 62*          | -      | 77           | -      | 1,165,087        | 2.4%   | 216,286          | 0.4%   | 1,381,450   | 1.4%   |
| plus strand                                           | -            | -      | -            | -      | 1,150,841        | 98.8%  | 210,533          | 97.3%  | 1,361,374   | 98.1%  |
| minus strand                                          | -            | -      | -            | -      | 14,246           | 1.2%   | 5,753            | 2.7%   | 19,999      | 1.9%   |

\*SsHV2L reads in non-inoculated samples likely result from errors in barcode sequences.

**Table S1b.** Trial #2 RNA-Seq analysis of virus-free and hypovirus-transfected *Sclerotinia sclerotiorum*

|                                                       | Library      |        |              |        |              |        |              |        |              |        |             |        |
|-------------------------------------------------------|--------------|--------|--------------|--------|--------------|--------|--------------|--------|--------------|--------|-------------|--------|
|                                                       | Virus-free_1 |        | Virus-free_2 |        | Virus-free_3 |        | Virus-free_4 |        | Virus-free_5 |        | Total       |        |
|                                                       | Count        | %      | Count        | %      | Count        | %      | Count        | %      | Count        | %      | Count       | %      |
| Raw reads                                             | 30,093,145   | 100.0% | 40,579,363   | 100.0% | 38,997,051   | 100.0% | 44,941,314   | 100.0% | 33,080,107   | 100.0% | 187,690,980 | 100.0% |
| Filtered reads                                        | 30,042,994   | 99.8%  | 40,505,260   | 99.8%  | 38,927,531   | 99.8%  | 44,846,033   | 99.8%  | 33,015,439   | 99.8%  | 187,337,257 | 99.8%  |
| <i>S. sclerotiorum</i> genome                         |              |        |              |        |              |        |              |        |              |        |             |        |
| Total aligned                                         | 26,871,479   | 89.4%  | 35,782,013   | 88.3%  | 34,813,856   | 89.4%  | 39,621,053   | 88.3%  | 29,615,431   | 89.7%  | 166,703,832 | 89.0%  |
| Unaligned                                             | 3,171,515    | 10.6%  | 4,723,247    | 11.7%  | 4,113,675    | 10.6%  | 5,224,980    | 11.7%  | 3,400,008    | 10.3%  | 20,633,425  | 11.0%  |
| Intergenic regions (non-rRNA)                         | 4,998,186    | 16.6%  | 7,686,048    | 19.0%  | 6,434,536    | 16.5%  | 7,752,858    | 17.3%  | 5,060,561    | 15.3%  | 31,932,189  | 17.0%  |
| Ribosomal RNA                                         | 3,683,044    | 12.3%  | 2,805,329    | 6.9%   | 4,539,626    | 11.7%  | 3,322,822    | 7.4%   | 6,155,590    | 18.6%  | 20,506,411  | 10.9%  |
| Retrotransposons                                      | 114,957      | 0.4%   | 126,391      | 0.3%   | 136,418      | 0.4%   | 130,049      | 0.3%   | 88,464       | 0.3%   | 596,279     | 0.3%   |
| Coding sequences                                      |              |        |              |        |              |        |              |        |              |        |             |        |
| Aligned                                               | 17,278,688   | 57.5%  | 23,840,323   | 58.9%  | 22,638,558   | 58.2%  | 27,223,916   | 60.7%  | 17,511,758   | 53.0%  | 108,493,243 | 57.9%  |
| plus strand                                           | 17,166,363   | 99.3%  | 23,625,424   | 99.1%  | 22,486,446   | 99.3%  | 27,025,184   | 99.3%  | 17,385,842   | 99.3%  | 107,689,259 | 99.3%  |
| minus strand                                          | 112,325      | 0.7%   | 214,899      | 0.9%   | 152,112      | 0.7%   | 198,732      | 0.7%   | 125,916      | 0.7%   | 803,984     | 0.7%   |
| Unaligned                                             | 12,764,306   | 42.5%  | 16,664,937   | 41.1%  | 16,288,973   | 41.8%  | 17,622,117   | 39.3%  | 15,503,681   | 47.0%  | 78,844,014  | 42.1%  |
| <i>Sclerotinia sclerotiorum</i> hypovirus 2L (SsHV2L) |              |        |              |        |              |        |              |        |              |        |             |        |
| Aligned                                               | 36*          | 0.0%   | 511          | 0.0%   | 380          | 0.0%   | 195          | 0.0%   | 23           | 0.0%   | 1,145       | 0.0%   |
| plus strand                                           | 35           | 0.0%   | 499          | 0.0%   | 373          | 0.0%   | 192          | 0.0%   | 23           | 0.0%   | 1,122       | 0.0%   |
| minus strand                                          | 1            | 0.0%   | 12           | 0.0%   | 7            | 0.0%   | 3            | 0.0%   | 0            | 0.0%   | 23          | 0.0%   |

**Table S1b (continue).** Trial #2 RNA-Seq analysis of virus-free and hypovirus-transfected *Sclerotinia sclerotiorum*

|                                                       | Virus-infected_1 |        | Virus-infected_2 |        | Virus-infected_3 |        | Virus-infected_4 |        | Virus-infected_5 |        | Total       |        |
|-------------------------------------------------------|------------------|--------|------------------|--------|------------------|--------|------------------|--------|------------------|--------|-------------|--------|
|                                                       | Count            | %      | Count            | %      | Count            | %      | Count            | %      | Count            | %      | Count       | %      |
| Raw reads                                             | 43,688,888       | 100.0% | 39,373,313       | 100.0% | 43,420,192       | 100.0% | 39,112,539       | 100.0% | 45,777,312       | 100.0% | 211,372,244 | 100.0% |
| Filtered reads                                        | 43,609,413       | 99.8%  | 39,295,735       | 99.8%  | 43,337,442       | 99.8%  | 39,047,576       | 99.8%  | 45,689,530       | 99.8%  | 210,979,696 | 99.8%  |
| <i>S. sclerotiorum</i> genome                         |                  |        |                  |        |                  |        |                  |        |                  |        |             |        |
| Total aligned                                         | 35,507,122       | 81.4%  | 32,573,106       | 82.9%  | 37,001,902       | 85.4%  | 34,039,626       | 87.2%  | 37,539,733       | 82.2%  | 176,661,489 | 83.7%  |
| Unaligned                                             | 8,102,291        | 18.6%  | 6,722,629        | 17.1%  | 6,335,540        | 14.6%  | 5,007,950        | 12.8%  | 8,149,797        | 17.8%  | 34,318,207  | 16.3%  |
| Intergenic regions (non-rRNA)                         | 7,045,401        | 16.2%  | 7,590,429        | 19.3%  | 8,674,711        | 20.0%  | 7,894,153        | 20.2%  | 7,714,740        | 16.9%  | 38,919,434  | 18.4%  |
| Ribosomal RNA                                         | 2,686,202        | 6.2%   | 892,650          | 2.3%   | 606,690          | 1.4%   | 885,034          | 2.3%   | 4,733,875        | 10.4%  | 9,804,451   | 4.6%   |
| Retrotransposons                                      | 157,132          | 0.4%   | 163,611          | 0.4%   | 175,054          | 0.4%   | 114,497          | 0.3%   | 156,372          | 0.3%   | 766,666     | 0.4%   |
| Coding sequences                                      |                  |        |                  |        |                  |        |                  |        |                  |        |             |        |
| Aligned                                               | 24,495,352       | 56.2%  | 22,530,142       | 57.3%  | 26,019,200       | 60.0%  | 23,647,091       | 60.6%  | 23,602,390       | 51.7%  | 120,294,175 | 57.0%  |
| plus strand                                           | 24,288,375       | 99.2%  | 22,329,958       | 99.1%  | 25,782,683       | 99.1%  | 23,437,236       | 99.1%  | 23,412,311       | 99.2%  | 119,250,563 | 99.1%  |
| minus strand                                          | 206,977          | 0.8%   | 200,184          | 0.9%   | 236,517          | 0.9%   | 209,855          | 0.9%   | 190,079          | 0.8%   | 1,043,612   | 0.9%   |
| Unaligned                                             | 19,114,061       | 43.8%  | 16,765,593       | 42.7%  | 17,318,242       | 40.0%  | 15,400,485       | 39.4%  | 22,087,140       | 48.3%  | 90,685,521  | 43.0%  |
| <i>Sclerotinia sclerotiorum</i> hypovirus 2L (SsHV2L) |                  |        |                  |        |                  |        |                  |        |                  |        |             |        |
| Aligned                                               | 3,546,501        | 8.1%   | 2,587,540        | 6.6%   | 1,650,572        | 3.8%   | 782,150          | 2.0%   | 3,537,497        | 7.7%   | 12,104,260  | 5.7%   |
| plus strand                                           | 3,422,612        | 96.5%  | 2,499,769        | 96.6%  | 1,610,062        | 97.5%  | 769,161          | 98.3%  | 3,425,008        | 96.8%  | 11,726,612  | 96.9%  |
| minus strand                                          | 123,889          | 3.5%   | 87,771           | 3.4%   | 40,510           | 2.5%   | 12,989           | 1.7%   | 112,489          | 3.2%   | 377,648     | 3.1%   |

\*SsHV2L reads in non-inoculated samples likely result from errors in barcode sequences.

**Table S2a.** Trial #1 coding regions differentially expressed between virus-free and hypovirus-infected cultures of *Sclerotinia sclerotiorum*

| Locus      | Annotation                        | RNASeq          |                  |         |
|------------|-----------------------------------|-----------------|------------------|---------|
|            |                                   | Log Fold Change | adjusted P value | Up/Down |
| SS1G_11521 | Hypothetical protein              | 7.96            | 1.29E-70         | Up      |
| SS1G_08066 | Hypothetical protein              | 7.94            | 2.20E-79         | Up      |
| SS1G_08042 | Protein kinase                    | 7.55            | 2.22E-29         | Up      |
| SS1G_14214 | Hypothetical protein              | 7.20            | 1.43E-59         | Up      |
| SS1G_11520 | Hypothetical protein              | 7.04            | 2.36E-46         | Up      |
| SS1G_11519 | Heat shock protein 70             | 6.58            | 1.92E-59         | Up      |
| SS1G_03997 | Splicing factor                   | 6.55            | 5.32E-34         | Up      |
| SS1G_13734 | Carbohydrate transporter          | 6.48            | 3.03E-46         | Up      |
| SS1G_08001 | Hypothetical protein              | 6.40            | 9.69E-21         | Up      |
| SS1G_08063 | Succinyltransferase               | 6.19            | 5.26E-54         | Up      |
| SS1G_04312 | Endochitinase                     | 6.09            | 1.28E-18         | Up      |
| SS1G_14293 | Glucose oxidase                   | 5.96            | 2.31E-35         | Up      |
| SS1G_04857 | Endopolygalacturonase             | 5.86            | 1.33E-43         | Up      |
| SS1G_08041 | DUF3723 domain-containing protein | 5.76            | 1.76E-15         | Up      |
| SS1G_12509 | LysM domain-containing protein    | 5.63            | 1.39E-28         | Up      |
| SS1G_09723 | Hypothetical protein              | 5.40            | 1.44E-18         | Up      |
| SS1G_05933 | Hypothetical protein              | 5.33            | 4.76E-15         | Up      |
| SS1G_12142 | Sugar transport protein           | 5.29            | 4.25E-28         | Up      |
| SS1G_04841 | Sshxt1 sugar transport protein    | 5.25            | 3.72E-21         | Up      |
| SS1G_04353 | Hypothetical protein              | 5.17            | 1.18E-31         | Up      |
| SS1G_10617 | Glucoamylase                      | 5.10            | 7.86E-44         | Up      |
| SS1G_08062 | Hypothetical protein              | 5.02            | 7.44E-30         | Up      |
| SS1G_04305 | Dehydrogenase                     | 5.02            | 3.01E-21         | Up      |
| SS1G_01009 | Polygalacturonase                 | 4.99            | 1.24E-14         | Up      |
| SS1G_12425 | non-LTR retrotransposon           | 4.98            | 6.06E-13         | Up      |
| SS1G_00755 | Hypothetical protein              | 4.92            | 3.91E-17         | Up      |
| SS1G_11912 | Hypothetical protein              | 4.83            | 2.57E-24         | Up      |
| SS1G_01235 | Hypothetical protein              | 4.71            | 1.08E-13         | Up      |
| SS1G_05860 | Hypothetical protein              | 4.71            | 1.59E-12         | Up      |
| SS1G_12510 | Endochitinase                     | 4.70            | 1.20E-17         | Up      |
| SS1G_04331 | Hypothetical protein              | 4.66            | 1.10E-17         | Up      |
| SS1G_00750 | Hypothetical protein              | 4.55            | 3.49E-14         | Up      |
| SS1G_09722 | Serine protease                   | 4.51            | 8.18E-34         | Up      |
| SS1G_09518 | Hypothetical protein              | 4.49            | 4.56E-34         | Up      |
| SS1G_02383 | ABC transporter G family member   | 4.42            | 9.44E-27         | Up      |
| SS1G_07224 | Hypothetical protein              | 4.41            | 3.42E-12         | Up      |
| SS1G_13687 | Hypothetical protein              | 4.27            | 8.63E-13         | Up      |
| SS1G_13860 | Endoglucanase                     | 4.25            | 1.21E-22         | Up      |
| SS1G_07184 | Putative invertase                | 4.23            | 8.63E-28         | Up      |
| SS1G_02382 | ABC transporter G family member   | 4.16            | 2.36E-17         | Up      |
| SS1G_14244 | Probable efflux pump protein      | 4.15            | 1.02E-14         | Up      |

|            |                                           |      |          |    |
|------------|-------------------------------------------|------|----------|----|
| SS1G_04465 | Dehydrogenase/reductase                   | 4.14 | 8.49E-09 | Up |
| SS1G_08040 | Serine/threonine-protein kinase           | 4.10 | 9.74E-06 | Up |
| SS1G_02454 | Aflatoxin B1 aldehyde reductase member    | 4.08 | 8.22E-13 | Up |
| SS1G_08051 | Hypothetical protein                      | 4.07 | 6.60E-23 | Up |
| SS1G_13356 | Hypothetical protein                      | 4.05 | 1.83E-20 | Up |
| SS1G_06707 | Hypothetical protein                      | 4.02 | 1.05E-06 | Up |
|            | Putative alpha-ketoglutarate-dependent    |      |          |    |
| SS1G_04292 | sulfonate dioxygenase                     | 3.98 | 9.67E-10 | Up |
| SS1G_04030 | Lysophospholipase 2                       | 3.97 | 6.37E-12 | Up |
| SS1G_03092 | Sugar transport protein                   | 3.96 | 8.65E-18 | Up |
| SS1G_04339 | Protein FDD123                            | 3.95 | 4.85E-08 | Up |
| SS1G_01990 | Hypothetical protein                      | 3.85 | 3.98E-08 | Up |
| SS1G_13359 | Methyltransferase trt5                    | 3.84 | 4.06E-14 | Up |
| SS1G_11753 | Aflatoxin B1 aldehyde reductase           | 3.79 | 2.33E-07 | Up |
| SS1G_00148 | Versiconal hemiacetal acetate reductase   | 3.79 | 2.05E-10 | Up |
| SS1G_05550 | Hypothetical protein                      | 3.78 | 1.74E-08 | Up |
| SS1G_04279 | Hypothetical protein                      | 3.75 | 5.44E-08 | Up |
| SS1G_08545 | Hypothetical protein                      | 3.75 | 1.43E-09 | Up |
| SS1G_09392 | Glucoamylase                              | 3.74 | 4.16E-17 | Up |
| SS1G_09624 | Hypotential protein                       | 3.73 | 5.59E-16 | Up |
| SS1G_09517 | Chaperone protein DnaK                    | 3.70 | 2.02E-16 | Up |
| SS1G_13362 | Amidohydrolase                            | 3.70 | 6.16E-08 | Up |
| SS1G_09350 | Hypothetical protein                      | 3.67 | 9.98E-16 | Up |
| SS1G_01776 | Alpha-amylase                             | 3.65 | 2.06E-12 | Up |
| SS1G_12917 | WSC domain-containing glycosyltransferase | 3.63 | 1.44E-10 | Up |
| SS1G_13872 | Probable endo-1,3(4)-beta-glucanase       | 3.58 | 1.86E-06 | Up |
| SS1G_13003 | Hypothetical protein                      | 3.54 | 4.28E-11 | Up |
| SS1G_05338 | Hypothetical protein                      | 3.53 | 3.82E-04 | Up |
| SS1G_13358 | Hypothetical protein                      | 3.53 | 2.68E-16 | Up |
| SS1G_08000 | Hypothetical protein                      | 3.50 | 4.43E-04 | Up |
| SS1G_00727 | Aldo-keto reductase                       | 3.50 | 1.51E-13 | Up |
| SS1G_13355 | Phenylalanine aminomutase                 | 3.48 | 2.68E-16 | Up |
| SS1G_13686 | pH-response regulator protein             | 3.44 | 6.64E-11 | Up |
| SS1G_11988 | Glucose dehydrogenase                     | 3.43 | 3.52E-15 | Up |
| SS1G_08007 | Hypothetical protein                      | 3.43 | 1.61E-04 | Up |
| SS1G_10071 | Probable pectin lyase A                   | 3.40 | 5.66E-06 | Up |
| SS1G_06664 | Purine-cytosine permease FCY21            | 3.40 | 1.28E-16 | Up |
| SS1G_11914 | Hypothetical protein                      | 3.40 | 4.75E-08 | Up |
| SS1G_02455 | Acetylornithine aminotransferase          | 3.33 | 1.54E-15 | Up |
| SS1G_02941 | Hypothetical protein                      | 3.33 | 5.26E-04 | Up |
| SS1G_06448 | Retinol dehydrogenase                     | 3.33 | 1.98E-07 | Up |
| SS1G_02194 | Oxygenase                                 | 3.33 | 1.10E-08 | Up |
| SS1G_00756 | Hypothetical protein                      | 3.33 | 5.31E-06 | Up |
| SS1G_00757 | Hypothetical protein                      | 3.32 | 2.46E-11 | Up |
| SS1G_06091 | Hypothetical protein                      | 3.32 | 2.68E-07 | Up |
| SS1G_05787 | Non-reducing polyketide synthase          | 3.32 | 2.52E-07 | Up |
| SS1G_06132 | Dehydrogenase                             | 3.32 | 3.40E-15 | Up |

|            |                                             |      |          |    |
|------------|---------------------------------------------|------|----------|----|
| SS1G_05360 | Hypothetical protein                        | 3.31 | 5.56E-08 | Up |
| SS1G_05430 | Hypothetical protein                        | 3.31 | 5.03E-09 | Up |
| SS1G_04090 | ABC transporter                             | 3.29 | 2.01E-06 | Up |
|            | Non-canonical non-ribosomal peptide         |      |          |    |
| SS1G_09449 | synthetase                                  | 3.29 | 2.68E-09 | Up |
| SS1G_09834 | Hypothetical protein                        | 3.29 | 4.34E-11 | Up |
| SS1G_08028 | Hypothetical protein                        | 3.28 | 3.85E-04 | Up |
| SS1G_09771 | Dehydrogenase/reductase                     | 3.28 | 7.50E-07 | Up |
| SS1G_01790 | Zip1-like transcription factor              | 3.27 | 7.94E-10 | Up |
| SS1G_04614 | Oxidoreductase                              | 3.26 | 5.29E-08 | Up |
| SS1G_06068 | Hypothetical protein                        | 3.25 | 1.28E-06 | Up |
| SS1G_04088 | Hydroxylase/oxygenase                       | 3.24 | 1.73E-11 | Up |
| SS1G_11524 | Hypothetical protein                        | 3.23 | 1.17E-15 | Up |
| SS1G_12778 | Hypothetical protein                        | 3.23 | 1.32E-15 | Up |
| SS1G_09374 | Oxidoreductase                              | 3.22 | 2.40E-10 | Up |
| SS1G_11769 | Hypothetical protein                        | 3.20 | 2.31E-11 | Up |
| SS1G_02676 | Sexual differentiation process protein      | 3.19 | 3.24E-14 | Up |
| SS1G_11773 | Hypothetical protein                        | 3.18 | 6.36E-10 | Up |
| SS1G_11513 | Hypothetical protein                        | 3.16 | 1.25E-10 | Up |
| SS1G_05507 | Hypothetical protein                        | 3.16 | 8.01E-11 | Up |
| SS1G_05565 | Hypothetical protein                        | 3.15 | 1.63E-03 | Up |
| SS1G_01231 | Probable sulfate permease                   | 3.15 | 4.12E-07 | Up |
| SS1G_01166 | Vanillin dehydrogenase                      | 3.14 | 9.76E-12 | Up |
| SS1G_14460 | 1,3-beta-glucanosyltransferase              | 3.12 | 1.99E-10 | Up |
| SS1G_13851 | Hypothetical protein                        | 3.11 | 2.17E-07 | Up |
| SS1G_04372 | Uncharacterized transporter                 | 3.10 | 1.47E-11 | Up |
| SS1G_00872 | Hypothetical protein                        | 3.10 | 1.15E-13 | Up |
| SS1G_05337 | Hypothetical protein                        | 3.08 | 2.52E-10 | Up |
| SS1G_08746 | Hypothetical protein                        | 3.07 | 1.97E-06 | Up |
| SS1G_13233 | Hypothetical protein                        | 3.07 | 2.82E-13 | Up |
| SS1G_12116 | Didemethylasterriquinone D synthetase       | 3.06 | 1.04E-06 | Up |
| SS1G_06921 | Hypothetical protein                        | 3.06 | 1.56E-06 | Up |
| SS1G_12907 | Cutinase                                    | 3.05 | 2.14E-07 | Up |
| SS1G_04089 | Hypothetical protein                        | 3.05 | 2.74E-08 | Up |
| SS1G_08103 | Fumarate reductase flavoprotein subunit     | 3.04 | 4.00E-06 | Up |
| SS1G_10222 | Hypothetical protein                        | 3.02 | 6.13E-12 | Up |
| SS1G_13360 | Hypothetical protein                        | 3.01 | 2.43E-08 | Up |
| SS1G_08643 | Hypothetical protein                        | 3.00 | 3.93E-07 | Up |
| SS1G_02834 | Hypothetical protein                        | 2.99 | 6.59E-06 | Up |
| SS1G_01939 | Hypothetical protein                        | 2.99 | 3.56E-03 | Up |
| SS1G_01167 | Transporter                                 | 2.98 | 4.01E-13 | Up |
| SS1G_00868 | Hypothetical protein                        | 2.95 | 4.67E-05 | Up |
| SS1G_08043 | Hypothetical protein                        | 2.95 | 9.92E-10 | Up |
| SS1G_08148 | Eukaryotic translation initiation factor 1b | 2.94 | 1.60E-03 | Up |
| SS1G_04322 | DEAD-box ATP-dependent RNA helicase         | 2.94 | 2.49E-08 | Up |
| SS1G_06365 | Dihydrogeodin oxidase                       | 2.94 | 5.89E-12 | Up |
| SS1G_13850 | Cyclochlorotine biosynthesis protein        | 2.93 | 1.65E-08 | Up |

|            |                                           |      |          |    |
|------------|-------------------------------------------|------|----------|----|
| SS1G_00775 | Hypothetical protein                      | 2.92 | 1.06E-05 | Up |
| SS1G_09135 | NADP-dependent alcohol dehydrogenase      | 2.91 | 1.53E-07 | Up |
| SS1G_00394 | Hypothetical protein                      | 2.90 | 3.01E-07 | Up |
| SS1G_10223 | Hypothetical protein                      | 2.90 | 4.12E-07 | Up |
| SS1G_00871 | Transfer/carrier protein                  | 2.90 | 1.38E-11 | Up |
| SS1G_06244 | Hypothetical protein                      | 2.88 | 6.65E-11 | Up |
| SS1G_08039 | Hypothetical protein                      | 2.87 | 2.03E-06 | Up |
| SS1G_04247 | Hypothetical protein                      | 2.86 | 2.75E-07 | Up |
| SS1G_10796 | Oxalate decarboxylase                     | 2.85 | 9.48E-06 | Up |
| SS1G_06394 | Guanyl-specific ribonuclease              | 2.83 | 9.33E-05 | Up |
| SS1G_00733 | Alcohol dehydrogenase                     | 2.83 | 2.98E-09 | Up |
| SS1G_09219 | Hypothetical protein                      | 2.82 | 4.97E-05 | Up |
| SS1G_08628 | Efflux pump/transporter                   | 2.79 | 1.60E-07 | Up |
| SS1G_04085 | Expansin-like protein                     | 2.78 | 6.19E-07 | Up |
| SS1G_00147 | Lyase                                     | 2.76 | 1.10E-08 | Up |
| SS1G_13852 | ABC transporter B family member           | 2.75 | 5.42E-09 | Up |
| SS1G_09322 | Hypothetical protein                      | 2.75 | 1.32E-05 | Up |
| SS1G_10616 | Hypothetical protein                      | 2.75 | 3.12E-04 | Up |
| SS1G_05121 | Hypothetical protein                      | 2.74 | 6.48E-07 | Up |
| SS1G_13982 | Para-nitrobenzyl esterase                 | 2.74 | 1.42E-06 | Up |
| SS1G_04091 | Hypothetical protein                      | 2.74 | 2.07E-04 | Up |
| SS1G_08984 | Hypothetical protein                      | 2.74 | 3.07E-08 | Up |
| SS1G_12235 | Putative enoyl-CoA hydratase/isomerase    | 2.73 | 1.49E-10 | Up |
| SS1G_06235 | Probable rhamnogalacturonase A            | 2.72 | 7.03E-07 | Up |
| SS1G_11771 | Hypothetical protein                      | 2.71 | 1.27E-03 | Up |
| SS1G_05042 | Hypothetical protein                      | 2.71 | 8.42E-10 | Up |
| SS1G_03181 | Aspartic protease                         | 2.70 | 1.06E-07 | Up |
| SS1G_05793 | Efflux pump vrtL                          | 2.68 | 2.56E-07 | Up |
| SS1G_13361 | Hypothetical protein                      | 2.68 | 5.00E-06 | Up |
| SS1G_12721 | Hypothetical protein                      | 2.68 | 1.87E-07 | Up |
| SS1G_05794 | Hypothetical protein                      | 2.67 | 1.72E-05 | Up |
| SS1G_01086 | Hypothetical protein                      | 2.66 | 3.83E-05 | Up |
| SS1G_01802 | Amino acid transporter                    | 2.66 | 5.03E-08 | Up |
| SS1G_00758 | Hypothetical protein                      | 2.66 | 4.52E-04 | Up |
| SS1G_01789 | Hypothetical protein                      | 2.65 | 2.90E-03 | Up |
| SS1G_12889 | Keratin, type II cytoskeletal 2 epidermal | 2.65 | 4.48E-04 | Up |
| SS1G_05943 | Cytochrome P450 monooxygenase             | 2.65 | 4.29E-04 | Up |
| SS1G_02770 | Aquaporin-like protein                    | 2.63 | 2.15E-09 | Up |
| SS1G_05006 | Glucose transporter                       | 2.62 | 8.05E-07 | Up |
| SS1G_10495 | D-arabinitol dehydrogenase                | 2.62 | 8.44E-09 | Up |
| SS1G_03409 | Sphingoid long-chain base transporter     | 2.60 | 5.00E-06 | Up |
| SS1G_14094 | Hypothetical protein                      | 2.59 | 1.16E-05 | Up |
| SS1G_12812 | Pachytene checkpoint protein              | 2.59 | 3.50E-09 | Up |
| SS1G_05027 | Hypothetical protein                      | 2.59 | 6.21E-04 | Up |
| SS1G_12231 | Hypothetical protein                      | 2.58 | 1.29E-03 | Up |
| SS1G_02733 | Hypothetical protein                      | 2.58 | 2.79E-05 | Up |
| SS1G_13849 | Hypothetical protein                      | 2.57 | 2.98E-06 | Up |

|            |                                                                                   |      |          |    |
|------------|-----------------------------------------------------------------------------------|------|----------|----|
| SS1G_08143 | Hypothetical protein                                                              | 2.56 | 3.63E-04 | Up |
| SS1G_08427 | Hypothetical protein                                                              | 2.56 | 8.04E-07 | Up |
| SS1G_12513 | LysM domain-containing protein                                                    | 2.55 | 3.24E-06 | Up |
| SS1G_13793 | Hypothetical protein                                                              | 2.54 | 2.32E-08 | Up |
| SS1G_11699 | Probable serine/threonine-protein kinase<br>Non-receptor serine/threonine protein | 2.54 | 1.99E-05 | Up |
| SS1G_12372 | kinase                                                                            | 2.53 | 3.15E-03 | Up |
| SS1G_10944 | Nuclear GTPase                                                                    | 2.52 | 2.54E-06 | Up |
| SS1G_08142 | Hypothetical protein                                                              | 2.52 | 9.30E-10 | Up |
| SS1G_12506 | Hypothetical protein                                                              | 2.51 | 2.06E-07 | Up |
| SS1G_10985 | Putative pyruvate decarboxylase                                                   | 2.50 | 2.60E-05 | Up |
| SS1G_09391 | Hypothetical protein                                                              | 2.50 | 3.66E-04 | Up |
| SS1G_04376 | Hypothetical protein                                                              | 2.50 | 3.62E-04 | Up |
| SS1G_11153 | Hypothetical protein                                                              | 2.50 | 1.40E-03 | Up |
| SS1G_03843 | Hypothetical protein                                                              | 2.50 | 2.16E-04 | Up |
| SS1G_08560 | Hydrolase                                                                         | 2.50 | 4.99E-04 | Up |
| SS1G_01199 | Pyridoxal reductase<br>Probable 1-alkyl-2-                                        | 2.49 | 2.86E-04 | Up |
| SS1G_09495 | acetylcholinesterase                                                              | 2.49 | 4.97E-05 | Up |
| SS1G_11990 | Hypothetical protein                                                              | 2.49 | 2.87E-04 | Up |
| SS1G_09984 | Hypothetical protein                                                              | 2.49 | 6.16E-08 | Up |
| SS1G_06093 | Peroxidase                                                                        | 2.48 | 2.98E-07 | Up |
| SS1G_12776 | Hypothetical protein                                                              | 2.48 | 7.52E-07 | Up |
| SS1G_06059 | Hypothetical protein                                                              | 2.47 | 9.37E-05 | Up |
| SS1G_13240 | Hypothetical protein                                                              | 2.46 | 2.64E-05 | Up |
| SS1G_11281 | Hypothetical protein                                                              | 2.46 | 3.38E-06 | Up |
| SS1G_05932 | NADH-cytochrome b5 reductase                                                      | 2.46 | 1.37E-05 | Up |
| SS1G_13234 | Efflux pump protein                                                               | 2.46 | 6.16E-08 | Up |
| SS1G_14371 | Hypothetical protein                                                              | 2.46 | 3.89E-05 | Up |
| SS1G_06243 | Dehydrogenase                                                                     | 2.44 | 9.37E-08 | Up |
| SS1G_04361 | Hypothetical protein                                                              | 2.43 | 1.14E-06 | Up |
| SS1G_12842 | Efflux pump protein                                                               | 2.42 | 2.44E-05 | Up |
| SS1G_01607 | Hypothetical protein                                                              | 2.41 | 1.50E-03 | Up |
| SS1G_07983 | Hypothetical protein                                                              | 2.41 | 1.74E-05 | Up |
| SS1G_07661 | Cutinase                                                                          | 2.40 | 2.14E-06 | Up |
| SS1G_13277 | GPI-anchored cupredoxin                                                           | 2.40 | 1.54E-04 | Up |
| SS1G_06250 | Hypothetical protein                                                              | 2.39 | 3.96E-03 | Up |
| SS1G_09448 | Hypothetical protein                                                              | 2.39 | 1.44E-07 | Up |
| SS1G_03091 | Hypothetical protein                                                              | 2.38 | 1.89E-07 | Up |
| SS1G_10224 | Metaxin-1                                                                         | 2.37 | 2.53E-07 | Up |
| SS1G_04429 | Hypothetical protein                                                              | 2.37 | 1.09E-07 | Up |
| SS1G_07894 | Hypothetical protein                                                              | 2.37 | 1.30E-03 | Up |
| SS1G_01648 | Hypothetical protein                                                              | 2.37 | 1.20E-04 | Up |
| SS1G_01087 | Hypothetical protein                                                              | 2.36 | 1.16E-05 | Up |
| SS1G_04548 | Hypothetical protein                                                              | 2.36 | 2.46E-03 | Up |
| SS1G_07231 | Methyltransferase                                                                 | 2.36 | 9.02E-08 | Up |
| SS1G_02548 | Transporter                                                                       | 2.36 | 6.16E-05 | Up |



|            |                                            |      |          |    |
|------------|--------------------------------------------|------|----------|----|
| SS1G_10070 | Hypothetical protein                       | 2.35 | 4.75E-05 | Up |
| SS1G_11499 | Antibacterial response protein/glucosidase | 2.34 | 1.96E-06 | Up |
| SS1G_10279 | Efflux pump protein                        | 2.34 | 6.31E-05 | Up |
| SS1G_13080 | Hypothetical protein                       | 2.34 | 1.20E-04 | Up |
| SS1G_07227 | Hypothetical protein                       | 2.34 | 5.05E-08 | Up |
| SS1G_08468 | Hypothetical protein                       | 2.33 | 2.33E-03 | Up |
| SS1G_11929 | Hypothetical protein                       | 2.33 | 1.51E-03 | Up |
| SS1G_07228 | Polyamine transporter                      | 2.33 | 2.69E-06 | Up |
| SS1G_08387 | Amino acid transporter                     | 2.33 | 1.36E-06 | Up |
| SS1G_03167 | Hypothetical protein                       | 2.33 | 2.49E-04 | Up |
| SS1G_11539 | Terpene cyclase                            | 2.32 | 2.05E-07 | Up |
| SS1G_02882 | Alternative oxidase, mitochondrial         | 2.32 | 3.10E-06 | Up |
| SS1G_01793 | Hypothetical protein                       | 2.31 | 3.31E-07 | Up |
| SS1G_07294 | Decarboxylase                              | 2.31 | 2.86E-03 | Up |
| SS1G_02356 | Reducing polyketide synthase               | 2.30 | 4.57E-04 | Up |
| SS1G_07627 | Hypothetical protein                       | 2.30 | 6.19E-05 | Up |
| SS1G_05890 | Hypothetical protein                       | 2.29 | 5.77E-07 | Up |
| SS1G_05789 | Probable esterase                          | 2.29 | 3.88E-04 | Up |
| SS1G_04303 | Hypothetical protein                       | 2.29 | 4.68E-04 | Up |
| SS1G_13735 | Hypothetical protein                       | 2.29 | 7.67E-04 | Up |
| SS1G_05394 | Cytochrome P450/oxygenase                  | 2.29 | 1.62E-03 | Up |
|            | Putative mitochondrial 2-                  |      |          |    |
| SS1G_02434 | oxoglutarate/malate carrier protein        | 2.28 | 1.49E-04 | Up |
| SS1G_05548 | Hypothetical protein                       | 2.28 | 6.30E-06 | Up |
| SS1G_01770 | Hypothetical protein                       | 2.28 | 3.72E-04 | Up |
| SS1G_05834 | Forkhead box DNA binding protein           | 2.27 | 1.43E-03 | Up |
| SS1G_06060 | Oxidoreductase                             | 2.26 | 1.38E-04 | Up |
| SS1G_01952 | Acyl-CoA dehydrogenase                     | 2.25 | 1.32E-06 | Up |
| SS1G_04903 | Calcium-binding protein                    | 2.25 | 2.94E-05 | Up |
| SS1G_13648 | Hypothetical protein                       | 2.25 | 2.78E-05 | Up |
| SS1G_06168 | Hypothetical protein                       | 2.25 | 1.41E-03 | Up |
| SS1G_01993 | Hypothetical protein                       | 2.24 | 2.51E-04 | Up |
| SS1G_12229 | Hypothetical protein                       | 2.24 | 5.59E-04 | Up |
| SS1G_12897 | 30 kDa heat shock protein                  | 2.24 | 1.02E-06 | Up |
| SS1G_05329 | Aspartic protease                          | 2.24 | 1.60E-03 | Up |
| SS1G_11478 | Ankyrin-2                                  | 2.23 | 3.50E-06 | Up |
| SS1G_05889 | Hypothetical protein                       | 2.23 | 1.21E-07 | Up |
| SS1G_03506 | Hypothetical protein                       | 2.22 | 6.69E-04 | Up |
| SS1G_13001 | Transcriptional regulatory protein moc3    | 2.22 | 2.51E-08 | Up |
| SS1G_11846 | Hypothetical protein                       | 2.21 | 1.54E-05 | Up |
| SS1G_04306 | Zinc-type alcohol dehydrogenase            | 2.21 | 1.66E-04 | Up |
| SS1G_12276 | Hypothetical protein                       | 2.21 | 2.23E-07 | Up |
| SS1G_01387 | Hypothetical protein                       | 2.20 | 7.89E-05 | Up |
| SS1G_05576 | Glycosyltransferase                        | 2.19 | 1.09E-03 | Up |
| SS1G_08893 | Hypothetical protein                       | 2.18 | 9.91E-08 | Up |
| SS1G_04351 | Hypothetical protein                       | 2.16 | 2.86E-04 | Up |
| SS1G_11522 | Hypothetical protein                       | 2.16 | 5.07E-07 | Up |

|            |                                             |      |          |    |
|------------|---------------------------------------------|------|----------|----|
| SS1G_08229 | Probable rhamnogalacturonase A              | 2.16 | 5.00E-04 | Up |
| SS1G_10309 | Hypothetical protein                        | 2.15 | 2.97E-04 | Up |
|            | Xylanolytic transcriptional activator xlnR  |      |          |    |
| SS1G_08351 | homolog                                     | 2.15 | 5.89E-05 | Up |
| SS1G_07293 | Hypothetical protein                        | 2.14 | 5.55E-04 | Up |
| SS1G_05832 | Probable exopolygalacturonase X             | 2.14 | 9.06E-05 | Up |
| SS1G_10193 | NmrA-like family domain-containing protein  | 2.13 | 2.49E-04 | Up |
| SS1G_01084 | Hypothetical protein                        | 2.11 | 4.31E-03 | Up |
| SS1G_11498 | Choline-sulfatase                           | 2.10 | 1.41E-05 | Up |
| SS1G_11770 | Hypothetical protein                        | 2.09 | 4.41E-04 | Up |
| SS1G_09724 | Acyltransferase                             | 2.09 | 1.26E-04 | Up |
| SS1G_04371 | Hypothetical protein                        | 2.09 | 6.54E-05 | Up |
| SS1G_03783 | Hypothetical protein                        | 2.08 | 7.54E-04 | Up |
| SS1G_12775 | Serine protease                             | 2.08 | 2.38E-06 | Up |
| SS1G_09730 | Nitroalkane oxidase                         | 2.08 | 1.73E-06 | Up |
| SS1G_04145 | Hypothetical protein                        | 2.07 | 3.93E-04 | Up |
|            | Splicing regulatory glutamine/lysine-rich   |      |          |    |
| SS1G_02500 | protein 1                                   | 2.07 | 6.42E-06 | Up |
| SS1G_03116 | Hypothetical protein                        | 2.07 | 3.99E-04 | Up |
| SS1G_11958 | Hypothetical protein                        | 2.06 | 1.42E-04 | Up |
| SS1G_02412 | Hypothetical protein                        | 2.06 | 3.29E-05 | Up |
| SS1G_10898 | Hypothetical protein                        | 2.06 | 2.68E-05 | Up |
| SS1G_13809 | Glucoamylase                                | 2.05 | 1.14E-05 | Up |
|            | Probable xyloglucan-specific endo-beta-1,4- |      |          |    |
| SS1G_00501 | glucanase                                   | 2.05 | 2.57E-03 | Up |
| SS1G_14240 | Hypothetical protein                        | 2.04 | 4.75E-05 | Up |
| SS1G_07847 | Beta-glucosidase                            | 2.04 | 9.68E-05 | Up |
| SS1G_11853 | Carboxylesterase patB                       | 2.04 | 1.14E-05 | Up |
| SS1G_05791 | Hypothetical protein                        | 2.03 | 9.09E-04 | Up |
| SS1G_09537 | Serine protease                             | 2.02 | 1.30E-04 | Up |
| SS1G_08348 | Zinc-type alcohol dehydrogenase             | 2.02 | 3.99E-04 | Up |
| SS1G_02793 | Transcriptional activator protein           | 2.01 | 1.08E-03 | Up |
| SS1G_14006 | Endo-1,4-beta-xylanase                      | 2.01 | 2.92E-03 | Up |
| SS1G_09446 | Acyltransferase                             | 2.01 | 1.39E-03 | Up |
|            | Probable glucan endo-1,3-beta-glucosidase   |      |          |    |
| SS1G_01229 | ARB 02077                                   | 2.01 | 1.14E-05 | Up |
| SS1G_07863 | Cellobiose dehydrogenase                    | 1.98 | 3.92E-05 | Up |
| SS1G_07152 | Hypothetical protein                        | 1.98 | 1.14E-04 | Up |
| SS1G_10428 | Hypothetical protein                        | 1.98 | 5.79E-04 | Up |
| SS1G_08837 | Endoglucanase                               | 1.98 | 3.09E-03 | Up |
| SS1G_05368 | Beta-glucosidase                            | 1.98 | 1.45E-05 | Up |
| SS1G_04080 | Methyltransferase                           | 1.98 | 4.31E-04 | Up |
| SS1G_04343 | Hypothetical protein                        | 1.97 | 2.32E-04 | Up |
| SS1G_03220 | Carbonyl reductase family member            | 1.97 | 4.81E-03 | Up |
| SS1G_03166 | Hypothetical protein                        | 1.96 | 2.49E-04 | Up |
| SS1G_05758 | Hypothetical protein                        | 1.96 | 9.23E-06 | Up |
| SS1G_10092 | Endo-1,4-beta-xylanase                      | 1.95 | 2.70E-05 | Up |

|            |                                                               |      |          |    |
|------------|---------------------------------------------------------------|------|----------|----|
| SS1G_14291 | Microperfuranone synthase                                     | 1.94 | 3.83E-05 | Up |
| SS1G_05048 | Hypothetical protein                                          | 1.94 | 4.69E-03 | Up |
| SS1G_02384 | Hypothetical protein                                          | 1.94 | 1.56E-06 | Up |
| SS1G_00751 | Hypothetical protein                                          | 1.93 | 1.29E-04 | Up |
| SS1G_05798 | Hypothetical protein                                          | 1.93 | 1.53E-03 | Up |
| SS1G_01953 | Acetylsterase                                                 | 1.93 | 4.57E-04 | Up |
| SS1G_02703 | Hypothetical protein                                          | 1.92 | 1.37E-03 | Up |
| SS1G_10566 | MFS-type transporter                                          | 1.91 | 1.41E-05 | Up |
| SS1G_02880 | Hypothetical protein                                          | 1.91 | 1.09E-03 | Up |
| SS1G_05679 | 6-hydroxy-D-nicotine oxidase                                  | 1.91 | 2.09E-05 | Up |
| SS1G_04273 | High-affinity gluconate transporte                            | 1.90 | 2.06E-05 | Up |
| SS1G_09928 | Hypothetical protein                                          | 1.90 | 5.06E-04 | Up |
| SS1G_03880 | Hypothetical protein                                          | 1.90 | 4.75E-04 | Up |
| SS1G_13386 | Cutinase                                                      | 1.90 | 7.66E-04 | Up |
| SS1G_02161 | Oxygenase                                                     | 1.90 | 1.57E-05 | Up |
| SS1G_04095 | Rhamnogalacturonan acetylsterase                              | 1.89 | 2.38E-04 | Up |
| SS1G_09732 | Purine permease                                               | 1.89 | 6.57E-06 | Up |
| SS1G_04694 | Altered inheritance of mitochondria protein                   | 1.89 | 1.79E-04 | Up |
| SS1G_08006 | Telomerase-binding protein                                    | 1.88 | 3.85E-04 | Up |
| SS1G_05681 | Norsolorinic acid synthase                                    | 1.88 | 6.90E-06 | Up |
| SS1G_08638 | Pentatricopeptide repeat-containing protein,<br>mitochondrial | 1.88 | 2.92E-03 | Up |
| SS1G_00241 | Hypothetical protein                                          | 1.87 | 1.23E-05 | Up |
| SS1G_08026 | Hypothetical protein                                          | 1.87 | 1.02E-03 | Up |
| SS1G_05906 | Regulator of biquitin conjugation                             | 1.86 | 1.29E-03 | Up |
| SS1G_02717 | ATP-dependent DNA helicase subunit                            | 1.86 | 9.04E-06 | Up |
| SS1G_05792 | Carboxypeptidase Y inhibitor                                  | 1.86 | 7.51E-05 | Up |
| SS1G_11395 | Hypothetical protein                                          | 1.85 | 2.38E-04 | Up |
| SS1G_04757 | Iron import ATP-binding/permease protein                      | 1.85 | 1.13E-04 | Up |
| SS1G_12511 | Hypothetical protein                                          | 1.85 | 1.14E-04 | Up |
| SS1G_00767 | Hypothetical protein                                          | 1.84 | 4.31E-03 | Up |
| SS1G_00151 | Cytochrome P450 monooxygenase                                 | 1.84 | 2.25E-03 | Up |
| SS1G_06035 | Dehydrogenase                                                 | 1.84 | 1.02E-04 | Up |
| SS1G_01523 | Lactose permease                                              | 1.84 | 4.75E-05 | Up |
| SS1G_08558 | Serine protease                                               | 1.83 | 1.18E-03 | Up |
| SS1G_06281 | Ankyrin repeat domain-containing protein                      | 1.83 | 2.92E-03 | Up |
| SS1G_08204 | Hypothetical protein                                          | 1.82 | 1.01E-03 | Up |
| SS1G_01177 | Hypothetical protein                                          | 1.82 | 3.62E-03 | Up |
| SS1G_05487 | Hydrolase                                                     | 1.82 | 1.71E-03 | Up |
| SS1G_13917 | Hypothetical protein                                          | 1.82 | 7.04E-04 | Up |
| SS1G_04994 | Hypothetical protein                                          | 1.82 | 4.18E-03 | Up |
| SS1G_00557 | Hypothetical protein                                          | 1.82 | 8.54E-04 | Up |
| SS1G_02831 | Hypothetical protein                                          | 1.81 | 2.59E-03 | Up |
| SS1G_06601 | Ammonium transporter                                          | 1.81 | 1.98E-04 | Up |
| SS1G_08045 | Hypothetical protein                                          | 1.81 | 2.32E-04 | Up |
| SS1G_02838 | Hypothetical protein                                          | 1.79 | 4.67E-03 | Up |
| SS1G_07854 | Acetyltransferase                                             | 1.78 | 7.26E-04 | Up |

|            |                                          |      |          |    |
|------------|------------------------------------------|------|----------|----|
| SS1G_14049 | Endoribonuclease                         | 1.78 | 3.06E-03 | Up |
| SS1G_06339 | Hypothetical protein                     | 1.78 | 5.72E-05 | Up |
| SS1G_11394 | Isoflavone reductase homolog             | 1.78 | 3.50E-03 | Up |
| SS1G_01406 | Serine protease                          | 1.78 | 4.10E-05 | Up |
| SS1G_14440 | Disulfide-bond oxidoreductase            | 1.77 | 2.95E-04 | Up |
| SS1G_07720 | Chaperone                                | 1.77 | 4.62E-05 | Up |
| SS1G_07758 | Hypothetical protein                     | 1.77 | 2.50E-05 | Up |
|            | Putative thiosulfate sulfurtransferase,  |      |          |    |
| SS1G_01871 | mitochondrial                            | 1.77 | 6.61E-04 | Up |
| SS1G_11915 | Hypothetical protein                     | 1.77 | 9.56E-04 | Up |
| SS1G_06308 | Hypothetical protein                     | 1.77 | 5.38E-04 | Up |
| SS1G_11068 | tRNA amidotransferase subunit            | 1.77 | 5.03E-04 | Up |
| SS1G_04249 | Isomerase, peroxisomal                   | 1.76 | 1.90E-04 | Up |
| SS1G_12062 | Methylsalicylic acid decarboxylase       | 1.75 | 1.56E-03 | Up |
| SS1G_02429 | Sugar transporter                        | 1.75 | 1.44E-04 | Up |
| SS1G_08624 | Hypothetical protein                     | 1.74 | 1.69E-04 | Up |
| SS1G_02363 | Cytochrome P450 oxygenase 3A8            | 1.74 | 1.64E-04 | Up |
| SS1G_04515 | Phosphatase                              | 1.74 | 2.89E-04 | Up |
| SS1G_11982 | Hypothetical protein                     | 1.73 | 2.55E-03 | Up |
| SS1G_12660 | Hypothetical protein                     | 1.73 | 2.22E-03 | Up |
|            | Diadenosine 5',5'''-P1,P4-tetraphosphate |      |          |    |
| SS1G_07499 | phosphorylase                            | 1.72 | 5.62E-04 | Up |
| SS1G_10115 | non-LTR retrotransposon                  | 1.72 | 1.69E-04 | Up |
| SS1G_09381 | Endochitinase                            | 1.72 | 1.74E-03 | Up |
| SS1G_10943 | Regulatory protein cys-3                 | 1.72 | 2.08E-04 | Up |
| SS1G_04912 | Hypothetical protein                     | 1.72 | 1.66E-03 | Up |
| SS1G_05680 | Monooxygenase                            | 1.72 | 1.24E-04 | Up |
| SS1G_14427 | Hypothetical protein                     | 1.71 | 7.20E-04 | Up |
| SS1G_14289 | Acetylsterase                            | 1.70 | 1.08E-03 | Up |
| SS1G_13919 | Hypothetical protein                     | 1.70 | 1.57E-03 | Up |
| SS1G_05407 | Glucokinase                              | 1.70 | 2.86E-04 | Up |
| SS1G_14133 | Hypothetical protein                     | 1.70 | 3.53E-05 | Up |
| SS1G_02586 | Phenylalanine aminomutase                | 1.69 | 4.56E-03 | Up |
| SS1G_13155 | Endochitinase 2                          | 1.69 | 1.92E-03 | Up |
| SS1G_12507 | Actin family cytoskeletal protein        | 1.69 | 1.07E-03 | Up |
|            | Non-canonical non-ribosomal peptide      |      |          |    |
| SS1G_01217 | synthetase                               | 1.69 | 1.94E-03 | Up |
| SS1G_08642 | Oxygenase                                | 1.69 | 2.99E-04 | Up |
| SS1G_07667 | Clock-controlled protein 6               | 1.68 | 9.08E-04 | Up |
| SS1G_13451 | Hypothetical protein                     | 1.68 | 9.93E-05 | Up |
| SS1G_08383 | Probable 6-phosphogluconolactonase       | 1.68 | 1.59E-03 | Up |
| SS1G_04248 | Putative lysine N-acyltransferase        | 1.68 | 3.63E-04 | Up |
| SS1G_05900 | Hypothetical protein                     | 1.68 | 3.27E-04 | Up |
| SS1G_10088 | Trichodiene oxygenase                    | 1.67 | 2.20E-03 | Up |
| SS1G_10155 | Transporter                              | 1.67 | 2.08E-03 | Up |
|            | HECT-type ubiquitin ligase-interacting   |      |          |    |
| SS1G_02395 | protein                                  | 1.67 | 4.48E-04 | Up |

|            |                                         |      |          |    |
|------------|-----------------------------------------|------|----------|----|
| SS1G_03737 | TY3 family retrotransposon              | 1.67 | 5.03E-04 | Up |
| SS1G_08144 | Dehydrogenase                           | 1.66 | 2.19E-03 | Up |
| SS1G_11525 | Hypothetical protein                    | 1.66 | 4.73E-04 | Up |
| SS1G_14439 | Phospholipase                           | 1.66 | 4.63E-04 | Up |
| SS1G_04272 | Hypothetical protein                    | 1.65 | 3.56E-03 | Up |
| SS1G_02425 | Hypothetical protein                    | 1.65 | 1.60E-03 | Up |
| SS1G_08531 | Hypothetical protein                    | 1.64 | 2.87E-03 | Up |
| SS1G_10427 | TY3 family retrotransposon              | 1.64 | 2.20E-04 | Up |
| SS1G_09978 | Peptidase                               | 1.64 | 1.92E-04 | Up |
| SS1G_12427 | Methyltransferase                       | 1.64 | 3.69E-04 | Up |
| SS1G_01156 | TY3 family retrotransposon              | 1.64 | 8.87E-04 | Up |
| SS1G_03989 | O-methyltransferase                     | 1.64 | 1.52E-03 | Up |
| SS1G_13522 | Diacetyl reductase                      | 1.63 | 2.07E-03 | Up |
| SS1G_02456 | Hypothetical protein                    | 1.62 | 1.39E-03 | Up |
| SS1G_06869 | Retrotransposon                         | 1.62 | 1.64E-04 | Up |
| SS1G_08910 | Hypothetical protein                    | 1.61 | 3.68E-03 | Up |
| SS1G_02385 | Hypothetical protein                    | 1.61 | 1.30E-03 | Up |
| SS1G_06247 | Hypothetical protein                    | 1.61 | 2.33E-04 | Up |
| SS1G_12770 | Ketodihydrosphingosine reductase        | 1.61 | 2.53E-04 | Up |
| SS1G_03174 | Hypothetical protein                    | 1.60 | 8.52E-04 | Up |
| SS1G_14238 | Dimethyl-sulfide monooxygenase          | 1.60 | 4.72E-04 | Up |
| SS1G_06873 | Homogentisate 1,2-dioxygenase           | 1.58 | 3.73E-03 | Up |
| SS1G_05678 | Methyltransferase                       | 1.58 | 2.07E-04 | Up |
| SS1G_05434 | Hypothetical protein                    | 1.58 | 1.74E-03 | Up |
| SS1G_12679 | Gluconate 5-dehydrogenase               | 1.58 | 5.48E-04 | Up |
| SS1G_01718 | Transfer/carrier protein                | 1.57 | 4.05E-03 | Up |
| SS1G_11568 | Hypothetical protein                    | 1.57 | 1.77E-03 | Up |
| SS1G_13764 | Hypothetical protein                    | 1.57 | 1.56E-03 | Up |
| SS1G_00795 | Glutamate decarboxylase                 | 1.57 | 6.61E-04 | Up |
| SS1G_08257 | Glutamine amidotransferase              | 1.56 | 7.19E-04 | Up |
| SS1G_04336 | Efflux pump protein                     | 1.56 | 4.14E-03 | Up |
| SS1G_14404 | Choline transport protein               | 1.56 | 3.68E-03 | Up |
| SS1G_10067 | D-galactonate dehydratase               | 1.56 | 4.49E-03 | Up |
| SS1G_02399 | Rhamnogalacturonase                     | 1.55 | 1.21E-03 | Up |
| SS1G_05839 | Hypothetical protein                    | 1.55 | 2.98E-03 | Up |
| SS1G_03962 | Argininosuccinate lyase                 | 1.54 | 2.78E-03 | Up |
| SS1G_09965 | Sphingomyelin phosphodiesterase         | 1.54 | 6.31E-04 | Up |
| SS1G_10614 | U4/U6.U5 tri-snRNP-associated protein 1 | 1.54 | 5.88E-04 | Up |
| SS1G_05674 | FAD-linked oxidoreductase               | 1.54 | 2.05E-03 | Up |
| SS1G_04888 | Methyltransferase-like protein          | 1.53 | 8.87E-04 | Up |
| SS1G_08425 | Sugar transporter                       | 1.52 | 3.73E-03 | Up |
| SS1G_05356 | Hypothetical protein                    | 1.52 | 1.00E-03 | Up |
| SS1G_06254 | Hypothetical protein                    | 1.52 | 3.56E-03 | Up |
| SS1G_00736 | Dehydrogenase                           | 1.52 | 5.81E-04 | Up |
| SS1G_13112 | ATP-binding cassette (ABC) transporter  | 1.51 | 2.51E-03 | Up |
| SS1G_06665 | Methyltransferase                       | 1.51 | 2.98E-03 | Up |
| SS1G_07050 | Ankyrin-like protein                    | 1.50 | 1.51E-03 | Up |

|            |                                              |       |           |      |
|------------|----------------------------------------------|-------|-----------|------|
| SS1G_11055 | Membrane protein                             | 1.50  | 3.04E-03  | Up   |
| SS1G_10251 | Glutamate-cysteine ligase regulatory subunit | 1.49  | 4.77E-03  | Up   |
| SS1G_12287 | Hypothetical protein                         | 1.49  | 2.68E-03  | Up   |
| SS1G_08745 | Hypothetical protein                         | 1.48  | 1.71E-03  | Up   |
| SS1G_00014 | Hypothetical protein                         | 1.47  | 7.82E-04  | Up   |
| SS1G_05675 | Hypothetical protein                         | 1.47  | 1.93E-03  | Up   |
| SS1G_01915 | Chromatin/chromatin-binding protein          | 1.47  | 1.96E-03  | Up   |
| SS1G_05313 | Efflux pump protien                          | 1.46  | 1.86E-03  | Up   |
| SS1G_07511 | Hypothetical protein                         | 1.46  | 4.67E-03  | Up   |
| SS1G_11223 | Hypothetical protein                         | 1.45  | 3.18E-03  | Up   |
| SS1G_11603 | ATP-dependent 6-phosphofructokinase 1        | 1.44  | 2.61E-03  | Up   |
| SS1G_02776 | Catechol 1,2-dioxygenase                     | 1.43  | 4.43E-03  | Up   |
| SS1G_03293 | Hypothetical protein                         | 1.40  | 2.46E-03  | Up   |
| SS1G_02049 | Cytochrome P450 monooxygenase                | 1.39  | 4.11E-03  | Up   |
| SS1G_03286 | Pectinesterase                               | 1.39  | 4.69E-03  | Up   |
| SS1G_02870 | aspartic protease                            | 1.39  | 2.94E-03  | Up   |
| SS1G_04945 | Exoglucanase 1                               | 1.37  | 2.78E-03  | Up   |
| SS1G_04099 | Hydroxypropyl-CoM dehydrogenase              | 1.34  | 4.47E-03  | Up   |
| SS1G_00744 | Hypothetical protein                         | 1.32  | 3.50E-03  | Up   |
| SS1G_05676 | Dehydrogenase                                | 1.29  | 4.43E-03  | Up   |
| SS1G_05980 | Cytochrome P450 52A5                         | 1.28  | 4.94E-03  | Up   |
| SS1G_13505 | Hypothetical protein                         | 10.10 | 2.64E-118 | Down |
| SS1G_10484 | Hypothetical protein                         | 9.59  | 5.10E-78  | Down |
| SS1G_08790 | Hypothetical protein                         | 9.19  | 3.17E-97  | Down |
| SS1G_02828 | Hypothetical protein                         | 9.03  | 2.86E-72  | Down |
| SS1G_08163 | Hypothetical protein                         | 8.97  | 4.29E-89  | Down |
| SS1G_13844 | Hypothetical protein                         | 8.51  | 5.82E-62  | Down |
| SS1G_05939 | Hypothetical protein                         | 8.49  | 8.79E-74  | Down |
| SS1G_09248 | Cryparin                                     | 8.34  | 1.88E-88  | Down |
| SS1G_10485 | Zinc finger transcription factor             | 8.10  | 2.38E-66  | Down |
| SS1G_13274 | Hypothetical protein                         | 7.05  | 1.09E-47  | Down |
| SS1G_02695 | Hypothetical protein                         | 6.28  | 3.60E-28  | Down |
| SS1G_13965 | Hypothetical protein                         | 6.27  | 7.46E-25  | Down |
| SS1G_03616 | Dehydrogenase                                | 6.22  | 2.74E-45  | Down |
| SS1G_11468 | Hypothetical protein                         | 6.20  | 1.14E-41  | Down |
| SS1G_09270 | Hypothetical protein                         | 5.45  | 1.37E-28  | Down |
| SS1G_10466 | Pdp3-interacting factor 1                    | 4.95  | 1.97E-28  | Down |
| SS1G_05118 | Beta-1,3-glucan-binding protein              | 4.78  | 9.00E-20  | Down |
| SS1G_02692 | Hypothetical protein                         | 4.76  | 8.99E-24  | Down |
| SS1G_00854 | Oxidoreductase                               | 4.71  | 2.37E-16  | Down |
| SS1G_03430 | Hypothetical protein                         | 4.64  | 1.21E-25  | Down |
| SS1G_12357 | Hypothetical protein                         | 4.61  | 1.02E-27  | Down |
| SS1G_06527 | Hypothetical protein                         | 4.56  | 1.23E-14  | Down |
| SS1G_05112 | Laccase                                      | 4.55  | 2.74E-22  | Down |
| SS1G_02163 | Versiconal hemiacetal acetate esterase       | 4.51  | 7.05E-25  | Down |
| SS1G_05223 | Methyltransferase                            | 4.49  | 8.93E-19  | Down |
| SS1G_07262 | Hypothetical protein                         | 4.48  | 2.19E-17  | Down |

|            |                                      |      |          |      |
|------------|--------------------------------------|------|----------|------|
| SS1G_01478 | Sphingolipid C9-methyltransferase    | 4.47 | 1.35E-31 | Down |
| SS1G_13696 | Hypothetical protein                 | 4.45 | 3.87E-18 | Down |
| SS1G_05517 | Hypothetical protein                 | 4.40 | 2.63E-11 | Down |
| SS1G_11618 | Hypothetical protein                 | 4.38 | 2.16E-17 | Down |
| SS1G_01572 | Beta-galactosidase                   | 4.33 | 4.15E-25 | Down |
| SS1G_04171 | Hypothetical protein                 | 4.29 | 4.33E-20 | Down |
|            | Repressible high-affinity phosphate  |      |          |      |
| SS1G_02727 | permease                             | 4.28 | 4.22E-22 | Down |
| SS1G_05775 | Glucan 1,3-beta-glucosidase          | 4.27 | 3.61E-24 | Down |
| SS1G_05972 | Hypothetical protein                 | 4.19 | 3.22E-13 | Down |
| SS1G_09905 | Hypothetical protein                 | 4.14 | 5.20E-11 | Down |
| SS1G_10311 | Hypothetical protein                 | 4.11 | 1.61E-22 | Down |
| SS1G_13633 | Serine protease                      | 4.11 | 1.13E-09 | Down |
| SS1G_11104 | Hypothetical protein                 | 4.10 | 1.19E-24 | Down |
| SS1G_05518 | Hypothetical protein                 | 4.09 | 6.13E-11 | Down |
| SS1G_01426 | Hypothetical protein                 | 4.09 | 1.91E-12 | Down |
| SS1G_10892 | Hypothetical protein                 | 4.09 | 1.02E-11 | Down |
| SS1G_12361 | Hypothetical protein                 | 4.08 | 1.14E-15 | Down |
| SS1G_02879 | Hypothetical protein                 | 4.08 | 3.71E-19 | Down |
| SS1G_02694 | Glycosyltransferase                  | 4.07 | 7.91E-19 | Down |
| SS1G_08110 | Hypothetical protein                 | 4.04 | 1.15E-14 | Down |
| SS1G_01859 | Hypothetical protein                 | 4.04 | 5.09E-20 | Down |
| SS1G_06526 | Hypothetical protein                 | 4.04 | 3.08E-12 | Down |
| SS1G_05870 | Hypothetical protein                 | 4.00 | 3.43E-09 | Down |
| SS1G_08397 | Hypothetical protein                 | 3.99 | 3.89E-23 | Down |
| SS1G_07752 | Hypothetical protein                 | 3.96 | 6.24E-13 | Down |
| SS1G_04563 | Decarboxylase                        | 3.95 | 9.76E-15 | Down |
| SS1G_13009 | Hypothetical protein                 | 3.95 | 1.17E-07 | Down |
| SS1G_02250 | Hypothetical protein                 | 3.93 | 3.09E-11 | Down |
| SS1G_14398 | Hypothetical protein                 | 3.90 | 2.06E-24 | Down |
| SS1G_08398 | Sugar transporter                    | 3.87 | 6.11E-20 | Down |
| SS1G_07042 | Hypothetical protein                 | 3.85 | 2.97E-07 | Down |
| SS1G_10608 | Hypothetical protein                 | 3.84 | 9.10E-17 | Down |
| SS1G_09106 | Hypothetical protein                 | 3.84 | 1.03E-07 | Down |
| SS1G_08680 | Hypothetical protein                 | 3.83 | 5.53E-09 | Down |
| SS1G_01364 | Hypothetical protein                 | 3.81 | 5.26E-08 | Down |
| SS1G_10483 | Hypothetical protein                 | 3.80 | 7.67E-05 | Down |
| SS1G_13758 | Hypothetical protein                 | 3.79 | 4.35E-08 | Down |
| SS1G_01265 | Nonribosomal peptide synthetase      | 3.78 | 1.38E-15 | Down |
| SS1G_13843 | Hypothetical protein                 | 3.76 | 1.33E-05 | Down |
| SS1G_13636 | Cyclochlorotine biosynthesis protein | 3.73 | 2.63E-09 | Down |
| SS1G_12200 | Dehydrogenase                        | 3.72 | 2.78E-13 | Down |
| SS1G_11120 | Hypothetical protein                 | 3.70 | 1.17E-07 | Down |
| SS1G_09562 | Hypothetical protein                 | 3.69 | 1.55E-04 | Down |
| SS1G_09110 | Glucan endo-1,3-beta-glucosidase     | 3.62 | 4.25E-13 | Down |
| SS1G_10936 | Extracellular membrane protein       | 3.62 | 1.68E-16 | Down |
| SS1G_12806 | Hypothetical protein                 | 3.62 | 1.00E-06 | Down |

|            |                                      |      |          |      |
|------------|--------------------------------------|------|----------|------|
| SS1G_14108 | Calcium ion transporter              | 3.61 | 3.10E-19 | Down |
| SS1G_13635 | Hypothetical protein                 | 3.60 | 9.32E-08 | Down |
| SS1G_08080 | Hypothetical protein                 | 3.60 | 3.08E-15 | Down |
| SS1G_01759 | Sugar transporter                    | 3.56 | 3.61E-09 | Down |
| SS1G_00263 | Hypothetical protein                 | 3.55 | 1.05E-06 | Down |
| SS1G_07359 | Hypothetical protein                 | 3.55 | 1.44E-13 | Down |
| SS1G_02693 | Hypothetical protein                 | 3.53 | 1.09E-15 | Down |
| SS1G_04590 | Hypothetical protein                 | 3.52 | 6.18E-11 | Down |
| SS1G_12181 | Hypothetical protein                 | 3.52 | 2.88E-18 | Down |
| SS1G_13619 | Hypothetical protein                 | 3.51 | 6.37E-12 | Down |
| SS1G_03084 | Hypothetical protein                 | 3.46 | 2.71E-09 | Down |
| SS1G_00506 | Hypothetical protein                 | 3.46 | 5.85E-07 | Down |
| SS1G_14307 | Extracellular membrane protein       | 3.45 | 3.71E-19 | Down |
| SS1G_06053 | Hypothetical protein                 | 3.44 | 7.28E-13 | Down |
| SS1G_13637 | Hypothetical protein                 | 3.41 | 5.34E-07 | Down |
| SS1G_13024 | Efflux pump protein                  | 3.41 | 6.25E-17 | Down |
| SS1G_14000 | Hypothetical protein                 | 3.40 | 1.67E-06 | Down |
| SS1G_11673 | Hypothetical protein                 | 3.39 | 3.42E-12 | Down |
| SS1G_03615 | Hypothetical protein                 | 3.38 | 3.45E-14 | Down |
| SS1G_01657 | Linoleate diol synthase              | 3.38 | 3.71E-19 | Down |
| SS1G_07263 | Hypothetical protein                 | 3.37 | 8.70E-07 | Down |
| SS1G_12394 | Hypothetical protein                 | 3.36 | 5.09E-08 | Down |
| SS1G_03266 | Hypothetical protein                 | 3.36 | 5.43E-04 | Down |
| SS1G_08681 | Homeobox protein                     | 3.34 | 5.62E-15 | Down |
| SS1G_08644 | Lipase                               | 3.34 | 9.84E-15 | Down |
| SS1G_13613 | Hypothetical protein                 | 3.31 | 1.10E-09 | Down |
| SS1G_11189 | Metalloprotease                      | 3.31 | 1.08E-05 | Down |
| SS1G_10505 | Hypothetical protein                 | 3.29 | 1.10E-15 | Down |
| SS1G_13348 | Hypothetical protein                 | 3.26 | 2.41E-16 | Down |
| SS1G_04362 | Hypothetical protein                 | 3.24 | 1.30E-12 | Down |
| SS1G_13618 | Hypothetical protein                 | 3.24 | 3.74E-07 | Down |
| SS1G_14015 | Hypothetical protein                 | 3.24 | 2.54E-14 | Down |
| SS1G_14401 | Hypothetical protein                 | 3.24 | 1.31E-13 | Down |
| SS1G_10099 | Hypothetical protein                 | 3.23 | 4.27E-13 | Down |
| SS1G_01003 | Hypothetical protein                 | 3.21 | 9.57E-05 | Down |
| SS1G_06826 | Hypothetical protein                 | 3.21 | 7.59E-08 | Down |
| SS1G_00105 | Hypothetical protein                 | 3.18 | 3.45E-14 | Down |
| SS1G_12456 | Hypothetical protein                 | 3.16 | 4.02E-15 | Down |
| SS1G_11992 | Rhamnogalacturonan acetyltransferase | 3.16 | 1.19E-06 | Down |
| SS1G_09246 | Hypothetical protein                 | 3.16 | 1.74E-06 | Down |
| SS1G_04213 | GPI-anchored CFEM domain protein A   | 3.16 | 2.98E-09 | Down |
| SS1G_04136 | Hypothetical protein                 | 3.16 | 1.88E-06 | Down |
| SS1G_12633 | Hypothetical protein                 | 3.15 | 2.72E-12 | Down |
| SS1G_04137 | Hypothetical protein                 | 3.15 | 8.97E-14 | Down |
| SS1G_03614 | Hypothetical protein                 | 3.14 | 8.26E-14 | Down |
| SS1G_02616 | Hypothetical protein                 | 3.12 | 5.65E-13 | Down |
| SS1G_11994 | Hypothetical protein                 | 3.11 | 2.57E-15 | Down |



|            |                                                        |      |          |      |
|------------|--------------------------------------------------------|------|----------|------|
| SS1G_06825 | Hypothetical protein                                   | 3.11 | 4.75E-05 | Down |
| SS1G_02615 | Hypothetical protein                                   | 3.10 | 8.35E-07 | Down |
| SS1G_13906 | Efflux pump protein                                    | 3.10 | 4.33E-11 | Down |
| SS1G_04898 | Probable peptidoglycan-N-acetylglucosamine deacetylase | 3.10 | 3.65E-14 | Down |
| SS1G_06542 | Non-receptor serine/threonine-protein kinase SKS1      | 3.09 | 1.98E-13 | Down |
| SS1G_07900 | Signal transduction histidine kinase                   | 3.09 | 1.03E-14 | Down |
| SS1G_02022 | Secreted glycosidase                                   | 3.09 | 5.06E-12 | Down |
| SS1G_10082 | Hypothetical protein                                   | 3.09 | 5.03E-10 | Down |
| SS1G_02251 | Hypothetical protein                                   | 3.08 | 4.55E-09 | Down |
| SS1G_00084 | Hypothetical protein                                   | 3.07 | 1.59E-03 | Down |
| SS1G_12808 | Hypothetical protein                                   | 3.07 | 2.14E-13 | Down |
| SS1G_02729 | Hypothetical protein                                   | 3.06 | 6.98E-05 | Down |
| SS1G_11210 | Hypothetical protein                                   | 3.01 | 3.37E-07 | Down |
| SS1G_02718 | Hypothetical protein                                   | 3.00 | 6.60E-04 | Down |
| SS1G_06769 | Hypothetical protein                                   | 2.99 | 1.20E-12 | Down |
| SS1G_02826 | Haloacetate dehalogenase                               | 2.99 | 1.22E-14 | Down |
| SS1G_00095 | Hypothetical protein                                   | 2.98 | 4.19E-07 | Down |
| SS1G_01754 | Hypothetical protein                                   | 2.95 | 6.96E-09 | Down |
| SS1G_02001 | Hypothetical protein                                   | 2.94 | 4.97E-05 | Down |
| SS1G_13922 | Tripeptidyl-peptidase                                  | 2.94 | 4.77E-08 | Down |
| SS1G_10098 | Hypothetical protein                                   | 2.94 | 8.26E-06 | Down |
| SS1G_11073 | Hypothetical protein                                   | 2.94 | 8.30E-05 | Down |
| SS1G_09768 | Hypothetical protein                                   | 2.93 | 1.11E-07 | Down |
| SS1G_11364 | Hypothetical protein                                   | 2.92 | 6.41E-05 | Down |
| SS1G_01976 | 2-methylcitrate dehydratase                            | 2.90 | 3.20E-08 | Down |
| SS1G_10948 | Hypothetical protein                                   | 2.90 | 9.95E-08 | Down |
| SS1G_12708 | Cytochrome P450 monooxygenase                          | 2.89 | 4.33E-14 | Down |
| SS1G_00216 | Hypothetical protein                                   | 2.89 | 1.75E-04 | Down |
| SS1G_05079 | Transferase                                            | 2.88 | 5.03E-08 | Down |
| SS1G_11100 | Trehalose-6-phosphate hydrolase                        | 2.87 | 1.30E-10 | Down |
| SS1G_13013 | Hypothetical protein                                   | 2.86 | 2.96E-13 | Down |
| SS1G_03388 | Hypothetical protein                                   | 2.86 | 7.17E-05 | Down |
| SS1G_06670 | Hypothetical protein                                   | 2.84 | 3.72E-09 | Down |
| SS1G_05999 | Hypothetical protein                                   | 2.84 | 4.31E-11 | Down |
| SS1G_05204 | Hypothetical protein                                   | 2.83 | 9.52E-05 | Down |
| SS1G_06862 | Leukocyte receptor cluster member 8 homolog            | 2.83 | 1.07E-06 | Down |
| SS1G_03683 | Hypothetical protein                                   | 2.81 | 6.44E-09 | Down |
| SS1G_10456 | Hypothetical protein                                   | 2.81 | 2.24E-05 | Down |
| SS1G_10096 | Protein SnodProt1                                      | 2.81 | 2.07E-10 | Down |
| SS1G_04208 | Sugar transporter                                      | 2.79 | 2.39E-09 | Down |
| SS1G_00104 | Hypothetical protein                                   | 2.78 | 8.35E-08 | Down |
| SS1G_12385 | 1-phosphatidylinositol phosphodiesterase               | 2.77 | 6.33E-08 | Down |
| SS1G_00036 | Glucose-repressible gene protein                       | 2.76 | 2.51E-09 | Down |
| SS1G_08930 | Hypothetical protein                                   | 2.74 | 8.20E-07 | Down |

|            |                                      |      |          |      |
|------------|--------------------------------------|------|----------|------|
| SS1G_06493 | Transferase                          | 2.74 | 2.15E-09 | Down |
| SS1G_02613 | Hypothetical protein                 | 2.73 | 1.66E-03 | Down |
| SS1G_09265 | Hypothetical protein                 | 2.72 | 2.75E-07 | Down |
| SS1G_07816 | Hypothetical protein                 | 2.72 | 2.98E-06 | Down |
| SS1G_11356 | Hypothetical protein                 | 2.70 | 5.75E-05 | Down |
| SS1G_00484 | Cell-wall-anchored protein           | 2.70 | 1.63E-04 | Down |
| SS1G_13697 | Hypothetical protein                 | 2.70 | 7.67E-04 | Down |
| SS1G_14320 | Hypothetical protein                 | 2.70 | 9.34E-11 | Down |
| SS1G_14032 | Alkali-sensitive linkage protein     | 2.69 | 1.07E-09 | Down |
| SS1G_09101 | Hypothetical protein                 | 2.69 | 5.14E-10 | Down |
| SS1G_00849 | Hypothetical protein                 | 2.69 | 1.21E-04 | Down |
| SS1G_07261 | Hypothetical protein                 | 2.68 | 1.67E-04 | Down |
| SS1G_06948 | Metalloprotease(                     | 2.68 | 3.51E-10 | Down |
| SS1G_01655 | Hypothetical protein                 | 2.68 | 4.27E-06 | Down |
| SS1G_06535 | Amino acid transporter               | 2.67 | 2.91E-09 | Down |
| SS1G_06534 | Aerine protease                      | 2.66 | 3.49E-10 | Down |
| SS1G_01654 | Hypothetical protein                 | 2.66 | 2.59E-05 | Down |
| SS1G_01045 | Pheromone-regulated membrane protein | 2.66 | 2.96E-10 | Down |
| SS1G_11674 | Hypothetical protein                 | 2.63 | 1.20E-06 | Down |
| SS1G_09782 | Nuclease P1                          | 2.62 | 3.49E-06 | Down |
| SS1G_05299 | Hypothetical protein                 | 2.62 | 1.17E-03 | Down |
| SS1G_12608 | Hypothetical protein                 | 2.61 | 1.12E-07 | Down |
| SS1G_12488 | Myb-like DNA-binding protein         | 2.61 | 1.11E-09 | Down |
| SS1G_01530 | G-protein coupled receptor           | 2.60 | 1.36E-08 | Down |
| SS1G_00601 | Hypothetical protein                 | 2.60 | 1.11E-05 | Down |
| SS1G_10609 | Hypothetical protein                 | 2.59 | 4.97E-05 | Down |
| SS1G_01428 | Hypothetical protein                 | 2.58 | 1.94E-03 | Down |
| SS1G_01414 | Hypothetical protein                 | 2.57 | 4.88E-03 | Down |
| SS1G_04564 | Hypothetical protein                 | 2.57 | 3.78E-04 | Down |
| SS1G_06541 | Hypothetical protein                 | 2.57 | 5.24E-05 | Down |
| SS1G_03913 | Hypothetical protein                 | 2.56 | 1.26E-09 | Down |
| SS1G_05306 | Hypothetical protein                 | 2.55 | 6.16E-08 | Down |
| SS1G_02633 | Hypothetical protein                 | 2.55 | 1.26E-08 | Down |
| SS1G_08682 | Hypothetical protein                 | 2.55 | 2.76E-03 | Down |
| SS1G_09838 | Agglutinin                           | 2.55 | 4.35E-04 | Down |
| SS1G_09264 | Hypothetical protein                 | 2.54 | 3.71E-06 | Down |
| SS1G_03784 | Amino acid transporter               | 2.54 | 8.71E-07 | Down |
| SS1G_07699 | Hypothetical protein                 | 2.53 | 2.12E-08 | Down |
| SS1G_05103 | Hypothetical protein                 | 2.52 | 2.83E-09 | Down |
| SS1G_01658 | Hypothetical protein                 | 2.52 | 3.50E-05 | Down |
| SS1G_14396 | Alcohol dehydrogenase                | 2.52 | 5.05E-06 | Down |
| SS1G_06770 | Hypothetical protein                 | 2.52 | 7.43E-04 | Down |
| SS1G_00357 | Probable GPI-anchored cupredoxin     | 2.51 | 3.12E-07 | Down |
| SS1G_06940 | Ribonucleoprotein                    | 2.51 | 2.48E-05 | Down |
| SS1G_10610 | Hypothetical protein                 | 2.51 | 5.80E-06 | Down |
| SS1G_06133 | Dehydrogenase                        | 2.50 | 4.57E-07 | Down |
| SS1G_03299 | Hypothetical protein                 | 2.50 | 2.11E-09 | Down |

|            |                                             |      |          |      |
|------------|---------------------------------------------|------|----------|------|
| SS1G_04107 | Hypothetical protein                        | 2.49 | 1.46E-08 | Down |
| SS1G_04540 | NADH-cytochrome reductase                   | 2.49 | 9.73E-07 | Down |
| SS1G_01411 | Hypothetical protein                        | 2.49 | 8.51E-05 | Down |
| SS1G_11579 | Alpha-mannosidase                           | 2.49 | 2.63E-05 | Down |
| SS1G_13923 | Cytochrome P450 monooxygenase               | 2.49 | 5.09E-08 | Down |
| SS1G_13051 | Cellobiose dehydrogenase                    | 2.48 | 6.48E-07 | Down |
| SS1G_09646 | Hypothetical protein                        | 2.46 | 8.31E-07 | Down |
| SS1G_13683 | Fatty acid desaturase                       | 2.45 | 3.91E-08 | Down |
| SS1G_11009 | Hypothetical protein                        | 2.45 | 1.13E-06 | Down |
| SS1G_14495 | Hypothetical protein                        | 2.45 | 4.25E-06 | Down |
| SS1G_01613 | Hypothetical protein                        | 2.45 | 3.11E-05 | Down |
| SS1G_05457 | Hypothetical protein                        | 2.44 | 5.48E-09 | Down |
| SS1G_12109 | Hypothetical protein                        | 2.44 | 3.25E-04 | Down |
| SS1G_06307 | Hypothetical protein                        | 2.42 | 1.60E-07 | Down |
| SS1G_01293 | Hypothetical protein                        | 2.42 | 1.43E-07 | Down |
| SS1G_12337 | Vacuolar calcium ion transporter            | 2.42 | 7.58E-10 | Down |
| SS1G_10746 | Hypothetical protein                        | 2.40 | 7.08E-09 | Down |
| SS1G_10947 | Hypothetical protein                        | 2.40 | 4.72E-08 | Down |
| SS1G_14316 | Proton myo-inositol cotransporter           | 2.40 | 9.77E-10 | Down |
| SS1G_01656 | Transporter                                 | 2.40 | 4.35E-08 | Down |
| SS1G_02974 | Zinc finger protein                         | 2.39 | 3.84E-06 | Down |
| SS1G_01974 | Hypothetical protein                        | 2.39 | 7.29E-06 | Down |
| SS1G_01292 | Hypothetical protein                        | 2.38 | 1.45E-05 | Down |
| SS1G_06402 | Sugar transporter                           | 2.38 | 8.41E-07 | Down |
| SS1G_05102 | Hypothetical protein                        | 2.37 | 6.64E-07 | Down |
| SS1G_09250 | Xyloglucan-specific endo-beta-1,4-glucanase | 2.37 | 2.09E-06 | Down |
| SS1G_05141 | Hypothetical protein                        | 2.36 | 1.02E-06 | Down |
|            | Ribosomal RNA small subunit                 |      |          |      |
| SS1G_11106 | methyltransferase                           | 2.35 | 1.98E-08 | Down |
| SS1G_01536 | Hypothetical protein                        | 2.35 | 1.69E-04 | Down |
| SS1G_07968 | Hypothetical protein                        | 2.35 | 4.41E-05 | Down |
| SS1G_06084 | Hypothetical protein                        | 2.34 | 7.30E-04 | Down |
| SS1G_06666 | Hypothetical protein                        | 2.34 | 3.08E-05 | Down |
| SS1G_09216 | Beta-glucosidase                            | 2.33 | 4.59E-08 | Down |
| SS1G_01585 | Hypothetical protein                        | 2.32 | 4.31E-06 | Down |
| SS1G_07965 | Aminoacyl-tRNA synthetasec                  | 2.32 | 4.44E-09 | Down |
| SS1G_03733 | Hypothetical protein                        | 2.32 | 2.97E-06 | Down |
| SS1G_01958 | Hypothetical protein                        | 2.32 | 1.94E-06 | Down |
| SS1G_05061 | Hypothetical protein                        | 2.31 | 2.50E-07 | Down |
| SS1G_13264 | Putative amidase                            | 2.31 | 1.23E-03 | Down |
| SS1G_14018 | Oxidoreductase                              | 2.31 | 1.49E-06 | Down |
| SS1G_03164 | N-acetyltransferase                         | 2.30 | 3.14E-07 | Down |
| SS1G_03161 | Hypothetical protein                        | 2.30 | 7.42E-09 | Down |
| SS1G_09644 | Hypothetical protein                        | 2.30 | 5.81E-07 | Down |
| SS1G_04731 | Hypothetical protein                        | 2.29 | 8.64E-07 | Down |
| SS1G_00217 | Hypothetical protein                        | 2.29 | 3.74E-06 | Down |
| SS1G_12634 | Hypothetical protein                        | 2.27 | 2.88E-07 | Down |

|            |                                        |      |          |      |
|------------|----------------------------------------|------|----------|------|
| SS1G_11781 | Amino acid transporter                 | 2.27 | 3.09E-07 | Down |
| SS1G_13631 | Hypothetical protein                   | 2.26 | 1.49E-06 | Down |
| SS1G_09953 | Hypothetical protein                   | 2.26 | 3.27E-04 | Down |
| SS1G_03162 | Hypothetical protein                   | 2.26 | 2.86E-04 | Down |
| SS1G_06297 | Hypothetical protein                   | 2.25 | 2.02E-05 | Down |
| SS1G_03258 | Oligopeptide transporter               | 2.25 | 1.41E-06 | Down |
| SS1G_11617 | Hypothetical protein                   | 2.25 | 5.68E-05 | Down |
| SS1G_09638 | Cytochrome P450 monooxygenase          | 2.24 | 3.65E-06 | Down |
| SS1G_13511 | Hypothetical protein                   | 2.24 | 1.57E-04 | Down |
| SS1G_00703 | Glutathione S-transferase-like protein | 2.24 | 3.50E-04 | Down |
| SS1G_10503 | Hypothetical protein                   | 2.23 | 3.02E-05 | Down |
| SS1G_04167 | Hypothetical protein                   | 2.23 | 1.21E-06 | Down |
| SS1G_13017 | Hypothetical protein                   | 2.23 | 2.96E-04 | Down |
| SS1G_08902 | Hypothetical protein                   | 2.23 | 3.57E-03 | Down |
| SS1G_10559 | Hypothetical protein                   | 2.22 | 4.94E-08 | Down |
| SS1G_05871 | Hypothetical protein                   | 2.22 | 8.27E-04 | Down |
| SS1G_13014 | Hypothetical protein                   | 2.21 | 1.15E-03 | Down |
| SS1G_10768 | Hypothetical protein                   | 2.20 | 1.20E-06 | Down |
| SS1G_00702 | O-methyltransferase                    | 2.18 | 4.22E-03 | Down |
| SS1G_03912 | Hypothetical protein                   | 2.17 | 6.92E-05 | Down |
| SS1G_09187 | Sugar transporter                      | 2.17 | 5.48E-04 | Down |
| SS1G_01081 | Catalase                               | 2.16 | 3.23E-07 | Down |
| SS1G_10760 | Hypothetical protein                   | 2.16 | 3.00E-05 | Down |
| SS1G_02119 | FAD-linked oxidoreductase              | 2.16 | 7.63E-07 | Down |
| SS1G_13908 | Acyltransferase                        | 2.15 | 7.24E-04 | Down |
| SS1G_01482 | Hypothetical protein                   | 2.15 | 4.14E-05 | Down |
| SS1G_01558 | Beta-glucosidase                       | 2.15 | 1.42E-06 | Down |
| SS1G_13385 | Hypothetical protein                   | 2.14 | 4.22E-04 | Down |
| SS1G_07663 | Extracellular glycosidase              | 2.13 | 6.78E-07 | Down |
| SS1G_06088 | Zinc finger protein                    | 2.13 | 1.23E-03 | Down |
| SS1G_00945 | Hypothetical protein                   | 2.12 | 6.97E-05 | Down |
| SS1G_10094 | Hypothetical protein                   | 2.12 | 6.68E-05 | Down |
| SS1G_09647 | Hypothetical protein                   | 2.12 | 5.59E-04 | Down |
| SS1G_09806 | Hypothetical protein                   | 2.12 | 2.46E-03 | Down |
| SS1G_03229 | Hypothetical protein                   | 2.11 | 1.40E-05 | Down |
| SS1G_00644 | Methyltransferase                      | 2.10 | 9.63E-05 | Down |
| SS1G_03465 | Hypothetical protein                   | 2.08 | 1.13E-06 | Down |
| SS1G_04931 | L-asparaginase                         | 2.08 | 8.38E-05 | Down |
| SS1G_11431 | Hypothetical protein                   | 2.08 | 9.63E-07 | Down |
| SS1G_09368 | Cation transporter                     | 2.08 | 1.24E-06 | Down |
| SS1G_14127 | Gamma-glutamyltransferase              | 2.08 | 3.53E-05 | Down |
| SS1G_02083 | Hypothetical protein                   | 2.08 | 5.93E-04 | Down |
| SS1G_11154 | Hypothetical protein                   | 2.08 | 2.67E-04 | Down |
| SS1G_02149 | Hypothetical protein                   | 2.08 | 3.56E-04 | Down |
| SS1G_09244 | Hypothetical protein                   | 2.07 | 1.63E-06 | Down |
| SS1G_02317 | Hypothetical protein                   | 2.07 | 5.00E-06 | Down |
| SS1G_10836 | Clock-controlled protein               | 2.07 | 2.43E-05 | Down |

|            |                                          |      |          |      |
|------------|------------------------------------------|------|----------|------|
| SS1G_08907 | Glycoside hydrolase                      | 2.07 | 3.93E-05 | Down |
| SS1G_01109 | Zinc finger protein                      | 2.06 | 4.19E-04 | Down |
| SS1G_10767 | Hypothetical protein                     | 2.05 | 4.59E-04 | Down |
| SS1G_07749 | Endo-1,4-beta-xylanase                   | 2.05 | 4.54E-03 | Down |
| SS1G_02763 | Hypothetical protein                     | 2.05 | 5.80E-04 | Down |
| SS1G_06349 | Uridine nucleosidase                     | 2.04 | 5.75E-05 | Down |
| SS1G_05463 | Hypothetical protein                     | 2.04 | 6.97E-06 | Down |
| SS1G_09477 | Hypothetical protein                     | 2.04 | 3.39E-06 | Down |
| SS1G_10882 | Alpha-amylase                            | 2.03 | 1.86E-04 | Down |
| SS1G_12782 | Hypothetical protein                     | 2.03 | 4.31E-06 | Down |
| SS1G_05140 | Esterase                                 | 2.03 | 1.31E-03 | Down |
| SS1G_04186 | Glycosyltransferase                      | 2.03 | 1.06E-05 | Down |
| SS1G_12635 | Hypothetical protein                     | 2.03 | 6.08E-05 | Down |
| SS1G_10677 | Trihydroxynaphthalene reductase          | 2.02 | 2.94E-05 | Down |
| SS1G_03774 | Hypothetical protein                     | 2.02 | 8.97E-05 | Down |
| SS1G_07027 | Hypothetical protein                     | 2.02 | 3.17E-03 | Down |
| SS1G_00359 | Hypothetical protein                     | 2.02 | 2.69E-04 | Down |
| SS1G_04969 | Hypothetical protein                     | 2.01 | 4.12E-05 | Down |
| SS1G_11119 | Hypothetical protein                     | 2.01 | 4.48E-04 | Down |
| SS1G_12762 | Hypothetical protein                     | 2.01 | 2.05E-03 | Down |
| SS1G_08548 | Hypothetical protein                     | 2.01 | 1.16E-05 | Down |
| SS1G_11487 | Hypothetical protein                     | 2.01 | 1.05E-04 | Down |
| SS1G_06703 | Hypothetical protein                     | 2.00 | 1.66E-03 | Down |
| SS1G_03319 | Lipase                                   | 2.00 | 9.08E-05 | Down |
| SS1G_05064 | Hypothetical protein                     | 2.00 | 2.09E-04 | Down |
| SS1G_07404 | Hypothetical protein                     | 2.00 | 8.33E-06 | Down |
| SS1G_05812 | Dehydrogenase                            | 1.99 | 1.13E-04 | Down |
| SS1G_01212 | Hypothetical protein                     | 1.99 | 1.73E-06 | Down |
| SS1G_05503 | Hypothetical protein                     | 1.99 | 3.78E-05 | Down |
| SS1G_06044 | Hypothetical protein                     | 1.99 | 1.07E-06 | Down |
| SS1G_10436 | Hypothetical protein                     | 1.98 | 8.04E-07 | Down |
| SS1G_08761 | Anthranilate synthase component          | 1.98 | 6.78E-05 | Down |
| SS1G_11181 | Hypothetical protein                     | 1.97 | 2.94E-03 | Down |
| SS1G_03593 | Monooxygenase                            | 1.97 | 3.73E-04 | Down |
| SS1G_08994 | Hypothetical protein                     | 1.97 | 2.81E-04 | Down |
| SS1G_09541 | Ankyrin repeat domain-containing protein | 1.97 | 2.28E-03 | Down |
| SS1G_03163 | Hypothetical protein                     | 1.97 | 1.98E-03 | Down |
| SS1G_08877 | Hypothetical protein                     | 1.97 | 3.62E-05 | Down |
| SS1G_00410 | Hypothetical protein                     | 1.96 | 6.81E-06 | Down |
| SS1G_01291 | Hypothetical protein                     | 1.96 | 6.16E-05 | Down |
| SS1G_09821 | Polysaccharide monooxygenase             | 1.96 | 2.36E-03 | Down |
| SS1G_07303 | Carboxypeptidase                         | 1.95 | 8.16E-06 | Down |
| SS1G_13909 | Cytochrome P450                          | 1.95 | 2.28E-03 | Down |
| SS1G_00411 | Hypothetical protein                     | 1.94 | 4.88E-03 | Down |
| SS1G_13315 | Dehydrogenase                            | 1.94 | 1.74E-03 | Down |
| SS1G_14433 | Lyase                                    | 1.94 | 1.43E-05 | Down |
| SS1G_06949 | Hypothetical protein                     | 1.94 | 1.32E-06 | Down |

|            |                                         |      |          |      |
|------------|-----------------------------------------|------|----------|------|
| SS1G_02859 | Hypothetical protein                    | 1.92 | 2.98E-03 | Down |
| SS1G_07351 | Hypothetical protein                    | 1.92 | 1.04E-05 | Down |
| SS1G_02140 | Heterokaryon incompatibility protein S  | 1.91 | 4.99E-04 | Down |
| SS1G_09105 | Hypothetical protein                    | 1.91 | 4.40E-05 | Down |
| SS1G_06213 | Hypothetical protein                    | 1.91 | 7.93E-05 | Down |
| SS1G_09765 | Zinc finger protein                     | 1.90 | 2.21E-05 | Down |
| SS1G_08995 | Hypothetical protein                    | 1.90 | 5.11E-04 | Down |
| SS1G_13008 | Nucleic acid binding protien            | 1.90 | 1.48E-04 | Down |
| SS1G_12180 | Hypothetical protein                    | 1.89 | 3.58E-06 | Down |
| SS1G_05424 | Hydroxyquinol 1,2-dioxygenase           | 1.89 | 4.03E-06 | Down |
| SS1G_01984 | Alcohol oxidase                         | 1.89 | 2.79E-04 | Down |
| SS1G_12291 | Hypothetical protein                    | 1.89 | 5.00E-06 | Down |
| SS1G_02164 | Aryl-alcohol dehydrogenase              | 1.88 | 4.40E-05 | Down |
| SS1G_09954 | Hypothetical protein                    | 1.88 | 2.74E-03 | Down |
| SS1G_06946 | Hypothetical protein                    | 1.87 | 7.84E-05 | Down |
| SS1G_01346 | Hypothetical protein                    | 1.87 | 6.76E-04 | Down |
| SS1G_11885 | Hypothetical protein                    | 1.87 | 8.75E-05 | Down |
| SS1G_12499 | Carboxypeptidase                        | 1.86 | 8.72E-06 | Down |
| SS1G_01036 | Hypothetical protein                    | 1.86 | 2.02E-04 | Down |
| SS1G_06146 | Hypothetical protein                    | 1.85 | 3.16E-04 | Down |
| SS1G_00855 | Hypothetical protein                    | 1.85 | 1.50E-03 | Down |
| SS1G_01490 | Hypothetical protein                    | 1.84 | 3.41E-03 | Down |
|            | ATPase family AAA domain-containing     |      |          |      |
| SS1G_13594 | protein                                 | 1.84 | 1.08E-04 | Down |
| SS1G_11265 | Hypothetical protein                    | 1.83 | 1.35E-05 | Down |
| SS1G_03016 | Monoxygenase                            | 1.82 | 7.67E-04 | Down |
| SS1G_01528 | Lanosterol synthase                     | 1.82 | 3.37E-05 | Down |
| SS1G_07180 | Tryprostatin hydroxylase                | 1.82 | 2.48E-05 | Down |
| SS1G_09363 | Feruloyl esterase                       | 1.80 | 1.13E-04 | Down |
| SS1G_07881 | Transcription cofactor                  | 1.79 | 1.86E-03 | Down |
| SS1G_07964 | Oxidoreductase                          | 1.79 | 1.04E-05 | Down |
| SS1G_13326 | Hypothetical protein                    | 1.79 | 6.87E-05 | Down |
| SS1G_11922 | Endo-arabinosidase                      | 1.79 | 2.33E-03 | Down |
| SS1G_12281 | Hypothetical protein                    | 1.78 | 3.02E-04 | Down |
| SS1G_12468 | Hypothetical protein                    | 1.78 | 1.21E-03 | Down |
| SS1G_13732 | Endochitinase                           | 1.77 | 5.53E-04 | Down |
| SS1G_10306 | Hypothetical protein                    | 1.77 | 3.10E-05 | Down |
| SS1G_12209 | Receptor-like protein                   | 1.77 | 1.49E-04 | Down |
| SS1G_09232 | Hypothetical protein                    | 1.76 | 5.21E-05 | Down |
| SS1G_08416 | Hypothetical protein                    | 1.75 | 4.41E-04 | Down |
| SS1G_04366 | Hypothetical protein                    | 1.75 | 7.63E-04 | Down |
| SS1G_08418 | Phosphate metabolism protein            | 1.75 | 4.57E-04 | Down |
|            | Cell wall integrity and stress response |      |          |      |
| SS1G_07234 | component                               | 1.75 | 9.73E-05 | Down |
| SS1G_10244 | AP-1-like transcription activator       | 1.75 | 1.29E-04 | Down |
| SS1G_08794 | Sugar transporter                       | 1.74 | 1.31E-04 | Down |
| SS1G_09475 | Carboxypeptidase                        | 1.74 | 4.42E-04 | Down |

|            |                                             |      |          |      |
|------------|---------------------------------------------|------|----------|------|
| SS1G_03015 | GTPase                                      | 1.74 | 1.20E-04 | Down |
| SS1G_13133 | Hypothetical protein                        | 1.74 | 8.90E-04 | Down |
| SS1G_03467 | Methyltransferase                           | 1.74 | 5.29E-04 | Down |
| SS1G_03571 | Hypothetical protein                        | 1.74 | 5.98E-05 | Down |
| SS1G_02242 | Hypothetical protein                        | 1.73 | 9.56E-04 | Down |
| SS1G_12763 | Cyanovirin-N homolog                        | 1.73 | 6.01E-04 | Down |
| SS1G_10604 | Dentin sialophosphoprotein                  | 1.73 | 4.32E-03 | Down |
| SS1G_12486 | Hypothetical protein                        | 1.72 | 4.69E-03 | Down |
| SS1G_12615 | Hypothetical protein                        | 1.72 | 1.54E-04 | Down |
| SS1G_10607 | Hypothetical protein                        | 1.72 | 1.62E-03 | Down |
| SS1G_07655 | Serine protease                             | 1.72 | 1.09E-03 | Down |
| SS1G_01627 | Laccase                                     | 1.71 | 2.86E-03 | Down |
| SS1G_11629 | UPF0613-like protei                         | 1.71 | 1.36E-03 | Down |
| SS1G_06917 | Hypothetical protein                        | 1.71 | 1.21E-03 | Down |
| SS1G_14306 | Homocitrate synthase, mitochondrial         | 1.71 | 3.78E-04 | Down |
| SS1G_07166 | Stress response protein                     | 1.70 | 3.46E-03 | Down |
| SS1G_06536 | Amino-acid transporter                      | 1.70 | 1.47E-03 | Down |
| SS1G_10457 | Hypothetical protein                        | 1.70 | 1.07E-03 | Down |
| SS1G_05304 | Aromatic peroxygenase                       | 1.68 | 2.86E-03 | Down |
| SS1G_11320 | Altered inheritance of mitochondria protein | 1.68 | 3.45E-04 | Down |
| SS1G_06174 | Hypothetical protein                        | 1.68 | 3.92E-04 | Down |
| SS1G_13516 | Hypothetical protein                        | 1.67 | 8.17E-05 | Down |
| SS1G_09225 | Serine protease                             | 1.67 | 2.14E-04 | Down |
| SS1G_01614 | Opsin-1                                     | 1.65 | 4.67E-03 | Down |
| SS1G_04295 | Hypothetical protein                        | 1.64 | 2.88E-04 | Down |
| SS1G_01480 | Dehydrogenase                               | 1.64 | 2.28E-03 | Down |
| SS1G_08677 | Cytochrome P450 monooxygenase               | 1.63 | 3.43E-04 | Down |
| SS1G_01651 | Transporter                                 | 1.63 | 8.72E-04 | Down |
| SS1G_14525 | Transporter                                 | 1.63 | 4.01E-04 | Down |
| SS1G_05308 | Hypothetical protein                        | 1.63 | 1.59E-03 | Down |
| SS1G_08861 | Hypothetical protein                        | 1.63 | 2.78E-04 | Down |
| SS1G_12938 | Cell wall protein                           | 1.63 | 2.25E-03 | Down |
| SS1G_07278 | Hypothetical protein                        | 1.62 | 7.22E-04 | Down |
| SS1G_10705 | Psi-producing oxygenase                     | 1.62 | 3.81E-03 | Down |
| SS1G_03438 | Fatty acid desaturase                       | 1.62 | 1.81E-03 | Down |
| SS1G_10502 | Rap guanine nucleotide exchange factor      | 1.61 | 6.10E-04 | Down |
| SS1G_10707 | Cell adhesion molecule                      | 1.61 | 3.46E-03 | Down |
| SS1G_04138 | Mutanase                                    | 1.61 | 5.97E-04 | Down |
| SS1G_02845 | Superoxide dismutase                        | 1.60 | 1.66E-03 | Down |
| SS1G_09929 | Acyl-carrier protein                        | 1.59 | 3.31E-03 | Down |
| SS1G_03459 | Hypothetical protein                        | 1.59 | 2.03E-03 | Down |
| SS1G_05918 | Hypothetical protein                        | 1.59 | 1.11E-03 | Down |
| SS1G_09114 | Chaperone protein DnaJ                      | 1.58 | 3.08E-03 | Down |
| SS1G_06904 | Monooxygenase                               | 1.58 | 2.86E-03 | Down |
| SS1G_04907 | mRNA export factor                          | 1.58 | 9.47E-04 | Down |
| SS1G_11224 | High affinity cysteine transporter          | 1.58 | 1.23E-03 | Down |
| SS1G_13838 | RNA binding protein                         | 1.57 | 4.58E-03 | Down |

|            |                                         |      |          |      |
|------------|-----------------------------------------|------|----------|------|
| SS1G_05388 | Hypothetical protein                    | 1.57 | 4.01E-04 | Down |
| SS1G_12810 | Hypothetical protein                    | 1.57 | 3.04E-03 | Down |
| SS1G_11596 | Hypothetical protein                    | 1.56 | 9.42E-04 | Down |
| SS1G_10263 | Non-motor actin binding protein         | 1.56 | 1.95E-03 | Down |
| SS1G_01425 | Hypothetical protein                    | 1.55 | 1.38E-03 | Down |
| SS1G_12822 | Hypothetical protein                    | 1.53 | 4.81E-04 | Down |
| SS1G_01937 | Hypothetical protein                    | 1.53 | 2.75E-03 | Down |
| SS1G_02947 | Hypothetical protein                    | 1.52 | 3.87E-03 | Down |
| SS1G_02646 | Hypothetical protein                    | 1.52 | 2.57E-03 | Down |
| SS1G_10320 | Hypothetical protein                    | 1.52 | 1.15E-03 | Down |
| SS1G_04984 | Hypothetical protein                    | 1.52 | 1.10E-03 | Down |
| SS1G_11212 | Polysaccharide monoxygenase             | 1.52 | 2.51E-03 | Down |
| SS1G_14001 | Fatty acid oxidation complex subunit    | 1.52 | 2.19E-03 | Down |
| SS1G_13638 | Efflux pump                             | 1.50 | 2.22E-03 | Down |
| SS1G_13812 | Oxidoreductase                          | 1.49 | 3.50E-03 | Down |
| SS1G_07962 | Hypothetical protein                    | 1.49 | 1.01E-03 | Down |
| SS1G_03014 | Hypothetical protein                    | 1.49 | 4.14E-03 | Down |
| SS1G_06143 | Hypothetical protein                    | 1.49 | 1.36E-03 | Down |
| SS1G_06041 | Transcription elongation factor         | 1.49 | 4.77E-03 | Down |
| SS1G_09655 | Hypothetical protein                    | 1.48 | 2.17E-03 | Down |
| SS1G_08132 | Transmembrane protein                   | 1.48 | 6.33E-04 | Down |
| SS1G_03642 | Oxidoreductase                          | 1.47 | 3.30E-03 | Down |
| SS1G_01840 | Hypothetical protein                    | 1.47 | 4.05E-03 | Down |
| SS1G_03292 | Hypothetical protein                    | 1.47 | 1.82E-03 | Down |
| SS1G_00810 | TLC domain-containing protein C17A2.02c | 1.46 | 3.06E-03 | Down |
| SS1G_00824 | Clumping factor B                       | 1.46 | 4.52E-03 | Down |
| SS1G_07892 | Hypothetical protein                    | 1.46 | 2.23E-03 | Down |
| SS1G_13559 | Anion/proton exchange transporter       | 1.44 | 2.70E-03 | Down |
| SS1G_01811 | Dehydrogenase                           | 1.44 | 2.76E-03 | Down |
| SS1G_10305 | Thioredoxin-like protein                | 1.44 | 4.81E-03 | Down |
| SS1G_05489 | Hypothetical protein                    | 1.43 | 3.97E-03 | Down |
| SS1G_00267 | Ubiquitin-protein ligase                | 1.43 | 1.30E-03 | Down |
| SS1G_12536 | Hypothetical protein                    | 1.43 | 1.34E-03 | Down |
| SS1G_07901 | Metalloprotease(PC00121)                | 1.41 | 3.42E-03 | Down |
| SS1G_09944 | Long-chain-fatty-acid--CoA ligase 1     | 1.41 | 1.18E-03 | Down |
| SS1G_05062 | Hypothetical protein                    | 1.40 | 3.62E-03 | Down |
| SS1G_12801 | Coumarate--CoA ligase                   | 1.40 | 1.97E-03 | Down |
| SS1G_07015 | Hypothetical protein                    | 1.39 | 3.56E-03 | Down |
| SS1G_07698 | ATP-dependent DNA helicase              | 1.39 | 3.18E-03 | Down |
| SS1G_12535 | Hypothetical protein                    | 1.37 | 2.08E-03 | Down |
| SS1G_13131 | Hypothetical protein                    | 1.37 | 2.18E-03 | Down |
| SS1G_14421 | Phospholipase                           | 1.35 | 4.69E-03 | Down |
| SS1G_06441 | Hypothetical protein                    | 1.34 | 4.66E-03 | Down |
| SS1G_05586 | Hypothetical protein                    | 1.31 | 4.73E-03 | Down |
| SS1G_06222 | Fumarate reductase                      | 1.29 | 3.46E-03 | Down |



**Table S2b.** Trial #2 coding regions differentially expressed between 5 virus-free and 5 hypovirus-infected cultures

| Locus      | Annotation                            | Log 2 fold |             |         |
|------------|---------------------------------------|------------|-------------|---------|
|            |                                       | change     | adj-P-value | Up/Down |
| SS1G_09248 | Cryparin                              | 4.419      | 6.67E-21    | Up      |
| SS1G_13965 | Hypothetical protein                  | 4.248      | 1.55E-11    | Up      |
| SS1G_14450 | Oxygenase                             | 4.045      | 2.30E-12    | Up      |
| SS1G_09241 | Hypothetical protein                  | 3.952      | 1.33E-09    | Up      |
| SS1G_11753 | Aflatoxin B1 aldehyde reductase       | 3.924      | 1.89E-14    | Up      |
| SS1G_10129 | Hypothetical protein                  | 3.712      | 1.27E-07    | Up      |
| SS1G_09242 | Hypothetical protein                  | 3.605      | 1.09E-07    | Up      |
| SS1G_12301 | Hypothetical protein                  | 3.534      | 1.41E-10    | Up      |
| SS1G_05491 | Oxygenase                             | 3.502      | 1.92E-09    | Up      |
| SS1G_14451 | Hypothetical protein                  | 3.401      | 4.71E-09    | Up      |
| SS1G_09374 | Oxidoreductase                        | 3.389      | 1.57E-13    | Up      |
| SS1G_14452 | Hypothetical protein                  | 3.353      | 1.51E-06    | Up      |
| SS1G_14003 | Hypothetical protein                  | 3.338      | 1.49E-06    | Up      |
| SS1G_09238 | Hydroxylase                           | 3.330      | 1.00E-09    | Up      |
| SS1G_09236 | Hypothetical protein                  | 3.272      | 2.98E-10    | Up      |
| SS1G_01199 | Pyridoxal reductase                   | 3.241      | 5.06E-13    | Up      |
| SS1G_13633 | Serine protease                       | 3.219      | 7.03E-12    | Up      |
| SS1G_05223 | Methyltransferase                     | 3.169      | 1.00E-09    | Up      |
| SS1G_09135 | NADP-dependent alcohol dehydrogenase  | 3.168      | 1.09E-11    | Up      |
| SS1G_13635 | Hypothetical protein                  | 3.118      | 5.94E-12    | Up      |
| SS1G_12712 | Hypothetical protein                  | 3.077      | 5.22E-08    | Up      |
| SS1G_09234 | Oxygenase                             | 3.071      | 2.11E-10    | Up      |
| SS1G_06132 | Dehydrogenase                         | 3.068      | 3.80E-08    | Up      |
| SS1G_04465 | Dehydrogenase/reductase               | 3.029      | 3.20E-13    | Up      |
| SS1G_12713 | Hypothetical protein                  | 2.973      | 2.88E-05    | Up      |
| SS1G_02828 | Hypothetical protein                  | 2.950      | 3.12E-18    | Up      |
| SS1G_11498 | Choline-sulfatase                     | 2.902      | 1.41E-14    | Up      |
| SS1G_13637 | Hypothetical protein                  | 2.895      | 1.02E-12    | Up      |
| SS1G_09244 | Hypothetical protein                  | 2.895      | 5.19E-09    | Up      |
| SS1G_00884 | Dehydrogenase                         | 2.850      | 1.51E-14    | Up      |
| SS1G_09239 | Hypothetical protein                  | 2.831      | 1.20E-07    | Up      |
| SS1G_03247 | Transporter                           | 2.817      | 1.80E-07    | Up      |
| SS1G_09243 | Hypothetical protein                  | 2.792      | 9.86E-08    | Up      |
| SS1G_07222 | Short-chain dehydrogenase             | 2.786      | 6.55E-07    | Up      |
| SS1G_11540 | Hypothetical protein                  | 2.747      | 3.71E-04    | Up      |
| SS1G_12300 | Oxygenase                             | 2.654      | 1.33E-05    | Up      |
| SS1G_09235 | Hydroxylase                           | 2.592      | 1.51E-11    | Up      |
| SS1G_11539 | Terpene cyclase                       | 2.555      | 4.60E-08    | Up      |
| SS1G_04464 | Hypothetical protein                  | 2.549      | 2.96E-15    | Up      |
| SS1G_09237 | Polyketide synthase 5-related protein | 2.549      | 9.78E-06    | Up      |
| SS1G_13642 | Transporter                           | 2.536      | 3.07E-13    | Up      |
| SS1G_04468 | Alpha-1,2-mannosidase                 | 2.521      | 1.75E-19    | Up      |
| SS1G_13641 | Polyketide synthase 5-related protein | 2.502      | 3.60E-07    | Up      |

|             |                                         |       |          |    |
|-------------|-----------------------------------------|-------|----------|----|
| SS1G_13636  | Cyclochlorotine biosynthesis protein    | 2.475 | 1.27E-08 | Up |
| SS1G_01489  | Hypothetical protein                    | 2.458 | 1.00E-08 | Up |
| SS1G_11932  | Dehydrogenase                           | 2.457 | 1.60E-10 | Up |
| SS1G_10128  | Hypothetical protein                    | 2.437 | 1.00E-03 | Up |
| SS1G_02194  | Oxygenase                               | 2.435 | 1.10E-09 | Up |
| SS1G_07655  | Serine protease                         | 2.420 | 1.76E-09 | Up |
| SS1G_06056  | Methyltransferase                       | 2.418 | 5.71E-04 | Up |
| SS1G_09858  | Hypothetical protein                    | 2.415 | 2.72E-06 | Up |
| SS1G_00044  | Hypothetical protein                    | 2.381 | 2.13E-13 | Up |
| SS1G_13877  | Protein AIM2                            | 2.367 | 1.98E-08 | Up |
| SS1G_13844  | Hypothetical protein                    | 2.336 | 3.92E-04 | Up |
| SS1G_04945  | Glucanase                               | 2.326 | 3.32E-09 | Up |
| SS1G_07854  | Acetyltransferase                       | 2.320 | 3.63E-10 | Up |
| SS1G_13264  | Putative amidase                        | 2.320 | 2.67E-03 | Up |
| SS1G_016208 | Hypothetical protein                    | 2.308 | 2.58E-03 | Up |
| SS1G_09270  | Hypothetical protein                    | 2.280 | 2.47E-11 | Up |
| SS1G_02454  | Aflatoxin B1 aldehyde reductase member  | 2.268 | 4.38E-07 | Up |
| SS1G_03644  | Hypothetical protein                    | 2.262 | 3.52E-04 | Up |
| SS1G_00148  | Versiconal hemiacetal acetate reductase | 2.261 | 7.54E-15 | Up |
| SS1G_07836  | Hypothetical protein                    | 2.256 | 2.77E-04 | Up |
| SS1G_12210  | Serine protease                         | 2.236 | 9.34E-06 | Up |
| SS1G_09225  | Serine protease                         | 2.219 | 4.87E-07 | Up |
| SS1G_06401  | Glucosidase                             | 2.192 | 2.33E-06 | Up |
| SS1G_06037  | Glucan 1,3-beta-glucosidase             | 2.154 | 1.00E-09 | Up |
| SS1G_13683  | Fatty acid desaturase                   | 2.139 | 2.01E-05 | Up |
| SS1G_06448  | Retinol dehydrogenase                   | 2.134 | 1.40E-05 | Up |
| SS1G_12907  | Cutinase                                | 2.119 | 3.42E-05 | Up |
| SS1G_13554  | Acetyltransferase                       | 2.119 | 2.57E-09 | Up |
| SS1G_05974  | Amino acid transporter                  | 2.118 | 1.08E-04 | Up |
| SS1G_06370  | Hypothetical protein                    | 2.110 | 2.27E-06 | Up |
| SS1G_08384  | Hypothetical protein                    | 2.108 | 4.87E-07 | Up |
| SS1G_12062  | Methylsalicylic acid decarboxylase      | 2.108 | 6.19E-05 | Up |
| SS1G_015697 | Hypothetical protein                    | 2.107 | 7.38E-03 | Up |
| SS1G_05912  | Hypothetical protein                    | 2.107 | 2.41E-05 | Up |
| SS1G_12116  | Didemethylasterriquinone D synthetase   | 2.079 | 1.28E-03 | Up |
| SS1G_13639  | Reductase                               | 2.062 | 5.52E-06 | Up |
| SS1G_02607  | Aromatic-l-amino-acid decarboxylase     | 2.043 | 1.81E-15 | Up |
| SS1G_02161  | Oxygenase                               | 2.016 | 6.26E-05 | Up |
| SS1G_12142  | Sugar transport protein                 | 2.001 | 9.58E-06 | Up |
| SS1G_14293  | Glucose oxidase                         | 1.998 | 6.71E-05 | Up |
| SS1G_13386  | Cutinase                                | 1.998 | 4.12E-05 | Up |
| SS1G_05794  | Hypothetical protein                    | 1.975 | 2.80E-11 | Up |
| SS1G_14166  | Hypothetical protein                    | 1.975 | 1.17E-05 | Up |
| SS1G_01572  | Beta-galactosidase                      | 1.957 | 1.45E-03 | Up |
| SS1G_11629  | Upf0613-like protei                     | 1.943 | 9.46E-06 | Up |
| SS1G_06068  | Hypothetical protein                    | 1.934 | 9.46E-06 | Up |
| SS1G_12708  | Cytochrome P450 monooxygenase           | 1.924 | 2.76E-04 | Up |

|            |                                            |       |          |    |
|------------|--------------------------------------------|-------|----------|----|
| SS1G_12198 | Dehydrogenase                              | 1.923 | 6.42E-04 | Up |
| SS1G_04819 | Serine protease                            | 1.906 | 5.53E-07 | Up |
| SS1G_00858 | Hypothetical protein                       | 1.904 | 1.99E-06 | Up |
| SS1G_01107 | Hypothetical protein                       | 1.901 | 2.69E-15 | Up |
| SS1G_05784 | Serine protease                            | 1.899 | 2.00E-09 | Up |
| SS1G_12870 | Glutathione-dependent formaldehyde-activat | 1.893 | 2.06E-06 | Up |
| SS1G_00458 | Hypothetical protein                       | 1.890 | 1.99E-06 | Up |
| SS1G_12817 | Sulfhydryl oxidase                         | 1.889 | 6.64E-09 | Up |
| SS1G_05493 | Carboxylic ester hydrolase                 | 1.888 | 2.39E-03 | Up |
| SS1G_02756 | Hypothetical protein                       | 1.886 | 1.10E-05 | Up |
| SS1G_11269 | Lyase                                      | 1.867 | 1.50E-06 | Up |
| SS1G_02738 | Dehydrogenase                              | 1.862 | 1.98E-04 | Up |
| SS1G_02695 | Hypothetical protein                       | 1.856 | 2.60E-03 | Up |
| SS1G_01389 | Hypothetical protein                       | 1.854 | 3.02E-05 | Up |
| SS1G_10263 | Non-motor actin binding protein            | 1.837 | 1.54E-06 | Up |
| SS1G_06394 | Guanyl-specific ribonuclease               | 1.837 | 4.79E-12 | Up |
| SS1G_03361 | Serine protease                            | 1.829 | 1.99E-05 | Up |
| SS1G_13362 | Amidohydrolase                             | 1.828 | 6.20E-06 | Up |
| SS1G_03404 | Dehydrogenase                              | 1.816 | 3.73E-08 | Up |
| SS1G_01491 | Reductase                                  | 1.813 | 7.43E-05 | Up |
| SS1G_02042 | ATP-binding cassette (ABC) transporter     | 1.813 | 2.80E-04 | Up |
| SS1G_11212 | Polysaccharide monooxygenase               | 1.803 | 4.50E-05 | Up |
| SS1G_02336 | Dehydrogenase                              | 1.798 | 3.58E-10 | Up |
| SS1G_13862 | Hypothetical protein                       | 1.794 | 3.89E-03 | Up |
| SS1G_13582 | Hypothetical protein                       | 1.792 | 9.73E-04 | Up |
| SS1G_02115 | Hypothetical protein                       | 1.792 | 7.60E-05 | Up |
| SS1G_11418 | Ligase                                     | 1.784 | 1.12E-05 | Up |
| SS1G_04343 | Hypothetical protein                       | 1.775 | 5.65E-04 | Up |
| SS1G_10561 | Hypothetical protein                       | 1.774 | 3.16E-06 | Up |
| SS1G_03346 | Hypothetical protein                       | 1.770 | 1.54E-04 | Up |
| SS1G_03181 | Aspartic protease                          | 1.769 | 1.53E-05 | Up |
| SS1G_06143 | Hypothetical protein                       | 1.761 | 1.31E-06 | Up |
| SS1G_03465 | Hypothetical protein                       | 1.758 | 1.98E-06 | Up |
| SS1G_00601 | Hypothetical protein                       | 1.755 | 2.81E-04 | Up |
| SS1G_10559 | Hypothetical protein                       | 1.742 | 2.10E-06 | Up |
| SS1G_03393 | Ethanolamine utilization protein           | 1.741 | 1.26E-05 | Up |
| SS1G_02946 | Hypothetical protein                       | 1.737 | 2.34E-09 | Up |
| SS1G_12824 | Hypothetical protein                       | 1.734 | 6.42E-11 | Up |
| SS1G_00147 | Lyase                                      | 1.724 | 2.66E-11 | Up |
| SS1G_03402 | Hydrolase                                  | 1.723 | 9.36E-05 | Up |
| SS1G_01387 | Hypothetical protein                       | 1.723 | 2.36E-09 | Up |
| SS1G_09771 | Dehydrogenase/reductase                    | 1.720 | 6.08E-07 | Up |
| SS1G_12075 | Oxidase                                    | 1.717 | 3.58E-04 | Up |
| SS1G_00337 | Hypothetical protein                       | 1.712 | 1.20E-05 | Up |
| SS1G_09105 | Hypothetical protein                       | 1.709 | 4.76E-04 | Up |
| SS1G_02030 | Hypothetical protein                       | 1.703 | 1.08E-10 | Up |
| SS1G_07294 | Decarboxylase                              | 1.695 | 1.46E-13 | Up |

|            |                                             |       |          |    |
|------------|---------------------------------------------|-------|----------|----|
| SS1G_05788 | Hypothetical protein                        | 1.694 | 5.82E-05 | Up |
| SS1G_11329 | Hypothetical protein                        | 1.694 | 5.35E-05 | Up |
| SS1G_05515 | Hypothetical protein                        | 1.664 | 6.91E-04 | Up |
| SS1G_11729 | Dehydrogenase                               | 1.656 | 2.80E-04 | Up |
| SS1G_08695 | Endochitinase                               | 1.656 | 7.99E-06 | Up |
| SS1G_12782 | Hypothetical protein                        | 1.641 | 2.11E-03 | Up |
| SS1G_12821 | Proteasome endopeptidase complex            | 1.640 | 7.95E-12 | Up |
| SS1G_09163 | Hypothetical protein                        | 1.637 | 2.31E-06 | Up |
| SS1G_08889 | Hypothetical protein                        | 1.634 | 2.01E-04 | Up |
| SS1G_14244 | Probable efflux pump protein                | 1.628 | 2.92E-03 | Up |
| SS1G_06040 | Lipase                                      | 1.624 | 5.59E-06 | Up |
| SS1G_06079 | L-serine dehydratase                        | 1.618 | 6.58E-06 | Up |
| SS1G_12413 | Carboxypeptidase                            | 1.614 | 1.58E-05 | Up |
| SS1G_04552 | Hypothetical protein                        | 1.606 | 6.84E-03 | Up |
| SS1G_12040 | Hypothetical protein                        | 1.603 | 1.98E-03 | Up |
| SS1G_02046 | Hypothetical protein                        | 1.603 | 3.24E-03 | Up |
| SS1G_12816 | Amino-acid aminotransferase                 | 1.596 | 4.73E-03 | Up |
| SS1G_06035 | Dehydrogenase                               | 1.593 | 2.53E-08 | Up |
| SS1G_08671 | Hypothetical protein                        | 1.584 | 9.49E-08 | Up |
| SS1G_09134 | Hypothetical protein                        | 1.584 | 7.92E-03 | Up |
| SS1G_13346 | Oligopeptide transporter 1                  | 1.583 | 6.19E-03 | Up |
| SS1G_07479 | Acetyltransferase                           | 1.579 | 1.01E-04 | Up |
| SS1G_05574 | Acetyltransferase                           | 1.578 | 6.81E-09 | Up |
| SS1G_09365 | Hypothetical protein                        | 1.568 | 1.68E-08 | Up |
| SS1G_09240 | Acytransferase                              | 1.568 | 3.31E-05 | Up |
| SS1G_00332 | Pectinesterase                              | 1.564 | 4.18E-04 | Up |
| SS1G_01627 | Iron transport multicopper oxidase          | 1.564 | 5.96E-05 | Up |
| SS1G_13923 | Cytochrome P450 monooxygenase               | 1.557 | 6.83E-05 | Up |
| SS1G_03518 | Serine protease                             | 1.554 | 1.86E-05 | Up |
| SS1G_07630 | 4-hydroxyphenylpyruvate dioxygenase         | 1.552 | 4.06E-04 | Up |
| SS1G_05556 | Transporter                                 | 1.535 | 1.46E-05 | Up |
| SS1G_03553 | Hypothetical protein                        | 1.532 | 1.38E-03 | Up |
| SS1G_01558 | Beta-glucosidase                            | 1.530 | 1.24E-04 | Up |
| SS1G_01099 | Dehydrogenase                               | 1.530 | 3.73E-04 | Up |
| SS1G_02218 | 2-oxoisovalerate dehydrogenase subunit alpt | 1.521 | 7.86E-04 | Up |
| SS1G_03067 | Hypothetical protein                        | 1.512 | 2.47E-04 | Up |
| SS1G_08643 | Hypothetical protein                        | 1.511 | 1.54E-06 | Up |
| SS1G_01478 | Sphingolipid C9-methyltransferase           | 1.507 | 6.97E-08 | Up |
| SS1G_02068 | Hypothetical protein                        | 1.507 | 6.20E-03 | Up |
| SS1G_10919 | Methyltransferase                           | 1.504 | 2.19E-05 | Up |
| SS1G_13860 | Endoglucanase                               | 1.498 | 1.29E-04 | Up |
| SS1G_09823 | Hypothetical protein                        | 1.493 | 3.63E-04 | Up |
| SS1G_02693 | Hypothetical protein                        | 1.491 | 7.84E-03 | Up |
| SS1G_09993 | Hypothetical protein                        | 1.486 | 1.57E-05 | Up |
| SS1G_07015 | Hypothetical protein                        | 1.486 | 3.02E-08 | Up |
| SS1G_10746 | Hypothetical protein                        | 1.480 | 1.25E-03 | Up |
| SS1G_03226 | Ubiquitin-protein ligase                    | 1.479 | 2.87E-07 | Up |

|             |                                              |       |          |    |
|-------------|----------------------------------------------|-------|----------|----|
| SS1G_12818  | Protease                                     | 1.479 | 3.37E-13 | Up |
| SS1G_03245  | Hypothetical protein                         | 1.478 | 7.33E-04 | Up |
| SS1G_07180  | Tryprostatin hydroxylase                     | 1.471 | 4.46E-03 | Up |
| SS1G_10167  | Endo-polygalacturonase                       | 1.467 | 1.74E-03 | Up |
| SS1G_11414  | Dehydrogenase                                | 1.464 | 1.36E-03 | Up |
| SS1G_12084  | Hypothetical protein                         | 1.463 | 6.29E-05 | Up |
| SS1G_05787  | Non-reducing polyketide synthase             | 1.461 | 5.46E-04 | Up |
| SS1G_12526  | Cation transporter                           | 1.453 | 2.15E-04 | Up |
| SS1G_05195  | Serine protease                              | 1.446 | 3.32E-03 | Up |
| SS1G_01984  | Alcohol oxidase                              | 1.440 | 2.90E-03 | Up |
| SS1G_08672  | Hypothetical protein                         | 1.439 | 4.98E-08 | Up |
| SS1G_08095  | Hypothetical protein                         | 1.437 | 9.94E-07 | Up |
| SS1G_13355  | Phenylalanine aminomutase                    | 1.436 | 3.45E-06 | Up |
| SS1G_10295  | Glutathione S-transferase 2                  | 1.435 | 4.29E-09 | Up |
| SS1G_11988  | Glucose dehydrogenase                        | 1.425 | 4.08E-03 | Up |
| SS1G_03309  | Hypothetical protein                         | 1.424 | 5.12E-12 | Up |
| SS1G_04362  | Hypothetical protein                         | 1.421 | 4.92E-03 | Up |
| SS1G_08441  | Biotin synthase, mitochondrial               | 1.421 | 1.11E-09 | Up |
| SS1G_11670  | Hypothetical protein                         | 1.414 | 9.69E-03 | Up |
| SS1G_01802  | Amino acid transporter                       | 1.413 | 3.96E-03 | Up |
| SS1G_08563  | Reductase                                    | 1.413 | 4.65E-03 | Up |
| SS1G_09997  | Hypothetical protein                         | 1.403 | 4.63E-03 | Up |
| SS1G_10691  | Hypothetical protein                         | 1.401 | 4.22E-03 | Up |
| SS1G_05381  | Hypothetical protein                         | 1.401 | 1.25E-03 | Up |
| SS1G_13812  | Oxidoreductase                               | 1.400 | 9.69E-03 | Up |
| SS1G_06477  | Hypothetical protein                         | 1.399 | 7.55E-07 | Up |
| SS1G_03843  | Hypothetical protein                         | 1.399 | 1.66E-06 | Up |
| SS1G_00121  | Hypothetical protein                         | 1.397 | 3.44E-03 | Up |
| SS1G_11362  | Methyltransferase                            | 1.396 | 6.91E-04 | Up |
| SS1G_08706  | Hypothetical protein                         | 1.395 | 1.90E-05 | Up |
| SS1G_09768  | Hypothetical protein                         | 1.395 | 4.13E-20 | Up |
| SS1G_01346  | Hypothetical protein                         | 1.389 | 1.77E-03 | Up |
| SS1G_12359  | Groes-like zinc-binding alcohol dehydrogenas | 1.389 | 1.58E-04 | Up |
| SS1G_10035  | Transaminase                                 | 1.388 | 2.26E-04 | Up |
| SS1G_09978  | Peptidase                                    | 1.387 | 8.84E-03 | Up |
| SS1G_05932  | NADH-cytochrome b5 reductase 2               | 1.387 | 1.03E-15 | Up |
| SS1G_09446  | Acyltransferase                              | 1.385 | 8.68E-03 | Up |
| SS1G_04310  | Phosphoadenosine phosphosulfate reductase    | 1.373 | 4.65E-03 | Up |
| SS1G_04614  | Oxidoreductase                               | 1.371 | 1.86E-05 | Up |
| SS1G_06688  | Dihydrolipoamide acetyltransferase           | 1.363 | 2.92E-03 | Up |
| SS1G_08257  | Glutamine amidotransferase                   | 1.357 | 1.56E-03 | Up |
| SS1G_04671  | Hypothetical protein                         | 1.354 | 1.38E-03 | Up |
| SS1G_03034  | Centromere protein V                         | 1.351 | 7.82E-04 | Up |
| SS1G_09020  | Glucanase                                    | 1.350 | 6.65E-03 | Up |
| SS1G_015885 | Hypothetical protein                         | 1.346 | 1.93E-03 | Up |
| SS1G_08163  | Hypothetical protein                         | 1.340 | 9.70E-03 | Up |
| SS1G_13922  | Tripeptidyl-peptidase                        | 1.339 | 7.92E-04 | Up |

|            |                                              |        |          |      |
|------------|----------------------------------------------|--------|----------|------|
| SS1G_11102 | Hypothetical protein                         | 1.338  | 2.84E-03 | Up   |
| SS1G_04137 | Hypothetical protein                         | 1.333  | 6.44E-04 | Up   |
| SS1G_11367 | Transcriptional activator                    | 1.328  | 3.59E-03 | Up   |
| SS1G_04888 | Methyltransferase-like protein               | 1.322  | 3.87E-06 | Up   |
| SS1G_00735 | Hypothetical protein                         | 1.319  | 5.96E-04 | Up   |
| SS1G_14167 | Hypothetical protein                         | 1.316  | 5.41E-05 | Up   |
| SS1G_14168 | Hydroxylase                                  | 1.315  | 5.12E-05 | Up   |
| SS1G_00481 | Hypothetical protein                         | 1.314  | 4.16E-04 | Up   |
| SS1G_11066 | Hypothetical protein                         | 1.304  | 1.30E-08 | Up   |
| SS1G_01871 | Putative thiosulfate sulfurtransferase       | 1.297  | 4.94E-06 | Up   |
| SS1G_01479 | Glutathione S-transferase                    | 1.294  | 4.06E-04 | Up   |
| SS1G_04413 | Transmembrane protein                        | 1.294  | 2.52E-08 | Up   |
| SS1G_04817 | Hypothetical protein                         | 1.292  | 6.90E-07 | Up   |
| SS1G_00237 | Acetyltransferase                            | 1.292  | 4.83E-04 | Up   |
| SS1G_12873 | Hypothetical protein                         | 1.289  | 1.13E-10 | Up   |
| SS1G_08368 | Damaged DNA-binding protein                  | 1.285  | 1.07E-03 | Up   |
| SS1G_05578 | Copper transporter                           | 1.281  | 2.40E-04 | Up   |
| SS1G_05273 | Hydrolase                                    | -1.280 | 7.19E-04 | Down |
| SS1G_07179 | Hypothetical protein                         | -1.283 | 7.52E-03 | Down |
| SS1G_12930 | Hypothetical protein                         | -1.283 | 7.31E-03 | Down |
| SS1G_13850 | Cyclochlorotine biosynthesis protein         | -1.291 | 2.55E-05 | Down |
| SS1G_03658 | 60s ribosomal export protein                 | -1.291 | 6.20E-06 | Down |
| SS1G_06472 | Hypothetical protein                         | -1.293 | 1.22E-03 | Down |
| SS1G_07977 | Hypothetical protein                         | -1.293 | 1.74E-03 | Down |
| SS1G_06409 | Hypothetical protein                         | -1.294 | 9.15E-06 | Down |
| SS1G_12767 | Ribosome biogenesis regulatory protein       | -1.297 | 7.20E-04 | Down |
| SS1G_06596 | Nucleic acid binding                         | -1.298 | 8.75E-04 | Down |
| SS1G_05888 | Hypothetical protein                         | -1.300 | 5.61E-03 | Down |
| SS1G_13545 | NADH dehydrogenase [ubiquinone] 1 alpha      | -1.301 | 3.38E-03 | Down |
| SS1G_00635 | Hypothetical protein                         | -1.301 | 2.33E-06 | Down |
| SS1G_14098 | DNA repair protein                           | -1.303 | 6.53E-03 | Down |
| SS1G_01062 | Amino-acid permease                          | -1.303 | 5.32E-04 | Down |
| SS1G_06725 | GPN-loop GTPase 1                            | -1.304 | 4.16E-04 | Down |
| SS1G_03057 | Multifunctional methyltransferase subunit    | -1.305 | 4.04E-06 | Down |
| SS1G_08136 | Oxygenase                                    | -1.308 | 4.34E-03 | Down |
| SS1G_05011 | U3 small nucleolar ribonucleoprotein protein | -1.309 | 2.77E-05 | Down |
| SS1G_12483 | Fibrillarlin                                 | -1.311 | 2.93E-04 | Down |
| SS1G_02326 | Hypothetical protein                         | -1.313 | 5.61E-03 | Down |
| SS1G_06430 | Hypothetical protein                         | -1.314 | 4.03E-04 | Down |
| SS1G_05628 | Hypothetical protein                         | -1.315 | 6.03E-04 | Down |
| SS1G_02608 | Tyrosine--tRNA ligase                        | -1.315 | 1.19E-03 | Down |
| SS1G_01124 | non-receptor serine/threonine protein kinase | -1.316 | 6.27E-07 | Down |
| SS1G_04686 | Phosphate transporter                        | -1.317 | 5.41E-04 | Down |
| SS1G_00623 | Oxygenase                                    | -1.319 | 6.28E-04 | Down |
| SS1G_00222 | rRNA biogenesis protein rrp36                | -1.325 | 2.99E-03 | Down |
| SS1G_02882 | Alternative oxidase, mitochondrial           | -1.327 | 2.05E-07 | Down |
| SS1G_04913 | Basic leucine zipper transcription factor    | -1.330 | 4.02E-04 | Down |

|            |                                             |        |          |      |
|------------|---------------------------------------------|--------|----------|------|
| SS1G_02281 | Phosphoenolpyruvate carboxykinase           | -1.332 | 5.84E-03 | Down |
| SS1G_01662 | Hypothetical protein                        | -1.334 | 4.25E-03 | Down |
| SS1G_06664 | Purine-cytosine permease FCY21              | -1.335 | 2.24E-03 | Down |
| SS1G_05968 | Hypothetical protein                        | -1.335 | 2.23E-03 | Down |
| SS1G_04926 | Eukaryotic translation initiation factor 3G | -1.336 | 1.83E-03 | Down |
| SS1G_09723 | Hypothetical protein                        | -1.340 | 9.01E-04 | Down |
| SS1G_10276 | Hypothetical protein                        | -1.340 | 4.78E-07 | Down |
| SS1G_05606 | Hypothetical protein                        | -1.342 | 1.84E-04 | Down |
| SS1G_09783 | KRR1 small subunit processome component     | -1.342 | 4.47E-04 | Down |
| SS1G_03561 | Glutamate-rich WD repeat-containing proteir | -1.344 | 1.73E-03 | Down |
| SS1G_06164 | Hypothetical protein                        | -1.344 | 1.78E-04 | Down |
| SS1G_05358 | GRPE protein homolog                        | -1.345 | 1.24E-04 | Down |
| SS1G_02712 | Hypothetical protein                        | -1.346 | 8.77E-03 | Down |
| SS1G_00058 | ATP-dependent RNA helicase dbp8             | -1.348 | 2.39E-04 | Down |
| SS1G_04442 | Hypothetical protein                        | -1.351 | 9.73E-04 | Down |
| SS1G_00789 | Nucleolar protein 16                        | -1.358 | 1.98E-04 | Down |
| SS1G_00988 | Hypothetical protein                        | -1.361 | 3.52E-04 | Down |
| SS1G_07973 | Oxygenase                                   | -1.363 | 3.07E-06 | Down |
| SS1G_08406 | Hypothetical protein                        | -1.365 | 5.22E-03 | Down |
| SS1G_08048 | Hypothetical protein                        | -1.367 | 3.49E-03 | Down |
| SS1G_13926 | 39S ribosomal protein L54                   | -1.368 | 9.43E-05 | Down |
| SS1G_07146 | Beta-glucosidase                            | -1.372 | 1.38E-03 | Down |
| SS1G_07872 | Ribosome biogenesis protein Nop10           | -1.373 | 4.30E-04 | Down |
| SS1G_12895 | YTH domain-containing protein               | -1.374 | 8.63E-07 | Down |
| SS1G_05629 | ATP-dependent RNA helicase ded1             | -1.375 | 2.84E-04 | Down |
| SS1G_06487 | Mitochondrial carrier protein               | -1.375 | 1.91E-04 | Down |
| SS1G_11882 | Exosome component 10                        | -1.376 | 4.88E-03 | Down |
| SS1G_00862 | Annexin                                     | -1.378 | 9.00E-03 | Down |
| SS1G_06721 | Hypothetical protein                        | -1.379 | 2.94E-04 | Down |
| SS1G_10185 | Hypothetical protein                        | -1.381 | 1.22E-05 | Down |
| SS1G_12388 | Hypothetical protein                        | -1.382 | 6.37E-13 | Down |
| SS1G_07815 | Hypothetical protein                        | -1.383 | 1.80E-04 | Down |
| SS1G_08616 | Hypothetical protein                        | -1.385 | 2.87E-03 | Down |
| SS1G_14249 | Inner membrane protein yidh                 | -1.387 | 1.42E-03 | Down |
| SS1G_01272 | Arginine N-methyltransferase 2              | -1.389 | 1.15E-03 | Down |
| SS1G_08688 | Acyltransferase                             | -1.389 | 5.35E-05 | Down |
| SS1G_01824 | Px domain-containing protein                | -1.390 | 7.15E-06 | Down |
| SS1G_07591 | Late secretory pathway protein              | -1.391 | 4.80E-07 | Down |
| SS1G_01143 | Alpha/beta-hydrolases protein               | -1.392 | 1.09E-03 | Down |
| SS1G_03690 | Hypothetical protein                        | -1.392 | 1.42E-04 | Down |
| SS1G_11475 | RNA binding protein                         | -1.394 | 6.59E-05 | Down |
| SS1G_00822 | Hypothetical protein                        | -1.394 | 2.87E-07 | Down |
| SS1G_09987 | Calcium-binding protein                     | -1.394 | 2.36E-04 | Down |
| SS1G_13479 | Hypothetical protein                        | -1.394 | 5.32E-04 | Down |
| SS1G_09570 | RNA helicase                                | -1.395 | 1.45E-04 | Down |
| SS1G_11824 | Ribonucleoprotein                           | -1.396 | 1.23E-04 | Down |
| SS1G_07525 | Elongator complex protein 3                 | -1.397 | 6.85E-05 | Down |

|            |                                              |        |          |      |
|------------|----------------------------------------------|--------|----------|------|
| SS1G_11230 | Transaminase                                 | -1.398 | 9.09E-07 | Down |
| SS1G_04907 | Elongation factor 3                          | -1.398 | 1.32E-04 | Down |
| SS1G_12259 | Hypothetical protein                         | -1.399 | 5.41E-04 | Down |
| SS1G_12174 | Transferase                                  | -1.399 | 2.03E-04 | Down |
| SS1G_11556 | Hypothetical protein                         | -1.399 | 9.95E-04 | Down |
| SS1G_08825 | Centromere DNA-binding protein               | -1.399 | 3.09E-05 | Down |
| SS1G_08245 | Hypothetical protein                         | -1.399 | 8.26E-03 | Down |
| SS1G_07962 | Hypothetical protein                         | -1.400 | 6.89E-06 | Down |
| SS1G_02271 | Annexin                                      | -1.400 | 2.00E-05 | Down |
| SS1G_10727 | Hypothetical protein                         | -1.401 | 2.38E-04 | Down |
| SS1G_11257 | Hypothetical protein                         | -1.401 | 9.95E-05 | Down |
| SS1G_11879 | Hypothetical protein                         | -1.404 | 4.42E-05 | Down |
| SS1G_00849 | Hypothetical protein                         | -1.404 | 1.20E-03 | Down |
| SS1G_09604 | DNA-directed RNA polymerase subunit          | -1.407 | 8.51E-04 | Down |
| SS1G_06674 | Ribosome biogenesis protein erb1             | -1.409 | 6.80E-05 | Down |
| SS1G_00144 | Cytoplasmic tRNA 2-thiolation protein 1      | -1.409 | 2.95E-04 | Down |
| SS1G_12054 | Inosine-5'-monophosphate dehydrogenase       | -1.413 | 9.43E-07 | Down |
| SS1G_10006 | Dehydratase                                  | -1.415 | 6.65E-05 | Down |
| SS1G_04628 | Hydrolase                                    | -1.415 | 4.89E-04 | Down |
| SS1G_10436 | Hypothetical protein                         | -1.416 | 3.49E-03 | Down |
| SS1G_09801 | Hypothetical protein                         | -1.416 | 1.26E-03 | Down |
| SS1G_10815 | U3 small nucleolar RNA-associated protein 25 | -1.417 | 5.97E-04 | Down |
| SS1G_03772 | Hypothetical protein                         | -1.418 | 4.50E-05 | Down |
| SS1G_09266 | Hypothetical protein                         | -1.421 | 1.67E-03 | Down |
| SS1G_08518 | Hypothetical protein                         | -1.422 | 4.39E-05 | Down |
| SS1G_11028 | Oxysterol-binding protein-related protein    | -1.423 | 2.91E-04 | Down |
| SS1G_13852 | ABC transporter B family member              | -1.424 | 1.90E-03 | Down |
| SS1G_05804 | Hypothetical protein                         | -1.424 | 3.17E-04 | Down |
| SS1G_02890 | Hypothetical protein                         | -1.425 | 9.90E-03 | Down |
| SS1G_01888 | Hypothetical protein                         | -1.426 | 6.60E-08 | Down |
| SS1G_03517 | Hypothetical protein                         | -1.428 | 5.61E-03 | Down |
| SS1G_13509 | RNA binding protein                          | -1.431 | 1.75E-05 | Down |
| SS1G_12118 | Hypothetical protein                         | -1.435 | 8.29E-03 | Down |
| SS1G_13519 | Methyltransferase                            | -1.436 | 9.74E-04 | Down |
| SS1G_08914 | tRNA pseudouridine synthase A                | -1.436 | 2.11E-03 | Down |
| SS1G_08606 | Serine/threonine-protein kinase              | -1.436 | 2.18E-04 | Down |
| SS1G_11897 | Nucleic acid binding                         | -1.440 | 7.33E-04 | Down |
| SS1G_14485 | P53-like transcription factor                | -1.440 | 3.75E-07 | Down |
| SS1G_13366 | DNA-directed RNA polymerase subunit beta     | -1.441 | 1.37E-04 | Down |
| SS1G_06496 | Aldehyde reductase i                         | -1.441 | 6.72E-03 | Down |
| SS1G_09681 | 60S ribosome subunit biogenesis protein NIP1 | -1.442 | 2.84E-04 | Down |
| SS1G_07456 | Hypothetical protein                         | -1.445 | 2.41E-03 | Down |
| SS1G_03215 | tRNA threonylcarbamoyladenosine dehydratase  | -1.446 | 3.08E-04 | Down |
| SS1G_04695 | Nitrosoguanidine resistance protein          | -1.448 | 2.19E-04 | Down |
| SS1G_05101 | 60S ribosome subunit biogenesis protein NIP1 | -1.449 | 4.25E-04 | Down |
| SS1G_14136 | Hypothetical protein                         | -1.449 | 4.44E-04 | Down |
| SS1G_12151 | RNA cytidine acetyltransferase               | -1.450 | 4.04E-04 | Down |



|            |                                              |        |          |      |
|------------|----------------------------------------------|--------|----------|------|
| SS1G_01880 | DNA-directed dna polymerase                  | -1.452 | 8.33E-03 | Down |
| SS1G_01719 | RAN GTPase-activating protein 1              | -1.453 | 1.60E-10 | Down |
| SS1G_05012 | U3 small nucleolar ribonucleoprotein protein | -1.454 | 6.95E-05 | Down |
| SS1G_14381 | Amino acid transporter                       | -1.454 | 9.61E-04 | Down |
| SS1G_02004 | Cysteine protease                            | -1.456 | 5.53E-04 | Down |
| SS1G_14530 | Hypothetical protein                         | -1.457 | 1.02E-03 | Down |
| SS1G_13702 | Amino acid transporter                       | -1.457 | 3.43E-06 | Down |
| SS1G_05206 | Hypothetical protein                         | -1.459 | 8.61E-05 | Down |
| SS1G_01895 | Hypothetical protein                         | -1.459 | 3.98E-05 | Down |
| SS1G_07305 | ARF3-interacting protein 1                   | -1.460 | 2.64E-04 | Down |
| SS1G_10567 | Sphingolipid c4-hydroxylase                  | -1.461 | 2.61E-03 | Down |
| SS1G_02554 | Transferase                                  | -1.463 | 9.21E-05 | Down |
| SS1G_07156 | Hypothetical protein                         | -1.463 | 1.73E-03 | Down |
| SS1G_04968 | Hypothetical protein                         | -1.463 | 1.77E-04 | Down |
| SS1G_05175 | Hypothetical protein                         | -1.463 | 2.46E-03 | Down |
| SS1G_10760 | Hypothetical protein                         | -1.463 | 2.43E-03 | Down |
| SS1G_00989 | Cytochrome C                                 | -1.464 | 2.61E-06 | Down |
| SS1G_03089 | G-protein coupled receptor                   | -1.464 | 2.68E-03 | Down |
| SS1G_04850 | Mannan endo-1,6-alpha-mannosidase            | -1.464 | 1.18E-07 | Down |
| SS1G_02468 | ATP-dependent RNA helicase mak5              | -1.465 | 1.09E-03 | Down |
| SS1G_14302 | Hypothetical protein                         | -1.466 | 3.10E-05 | Down |
| SS1G_10591 | Hypothetical protein                         | -1.468 | 8.09E-05 | Down |
| SS1G_01700 | Hypothetical protein                         | -1.468 | 1.46E-13 | Down |
| SS1G_09971 | Hypothetical protein                         | -1.469 | 1.45E-04 | Down |
| SS1G_08553 | Cysteine protease                            | -1.469 | 7.32E-06 | Down |
| SS1G_09727 | Thiamine thiazole synthase                   | -1.470 | 1.01E-03 | Down |
| SS1G_02810 | Hypothetical protein                         | -1.470 | 6.25E-05 | Down |
| SS1G_05438 | Assembly factor cbp4                         | -1.472 | 8.49E-05 | Down |
| SS1G_02863 | Hypothetical protein                         | -1.472 | 1.84E-04 | Down |
| SS1G_08319 | Heat repeat-containing protein 3             | -1.472 | 2.20E-05 | Down |
| SS1G_01769 | Hypothetical protein                         | -1.474 | 1.15E-12 | Down |
| SS1G_00926 | Hypothetical protein                         | -1.475 | 6.20E-06 | Down |
| SS1G_13341 | Hypothetical protein                         | -1.478 | 1.20E-06 | Down |
| SS1G_07889 | Mutase                                       | -1.482 | 7.44E-04 | Down |
| SS1G_10759 | Hypothetical protein                         | -1.483 | 5.76E-03 | Down |
| SS1G_06203 | Hypothetical protein                         | -1.485 | 2.16E-03 | Down |
| SS1G_02724 | Serine protease                              | -1.486 | 8.63E-05 | Down |
| SS1G_12412 | Carbohydrate transporter                     | -1.488 | 5.94E-03 | Down |
| SS1G_03117 | Pre-rRNA processing protein                  | -1.489 | 6.91E-04 | Down |
| SS1G_05411 | Exoribonuclease                              | -1.490 | 3.18E-04 | Down |
| SS1G_04443 | Hypothetical protein                         | -1.490 | 5.35E-04 | Down |
| SS1G_11873 | Damaged DNA-binding protein                  | -1.491 | 3.36E-04 | Down |
| SS1G_10774 | Hypothetical protein                         | -1.494 | 2.98E-04 | Down |
| SS1G_13084 | Oxygenase                                    | -1.496 | 9.85E-06 | Down |
| SS1G_07718 | Hypothetical protein                         | -1.496 | 1.14E-04 | Down |
| SS1G_09474 | Ca <sup>2+</sup> /H <sup>+</sup> antiporter  | -1.499 | 2.04E-04 | Down |
| SS1G_12233 | Carbohydrate kinase                          | -1.501 | 2.21E-05 | Down |

|            |                                              |        |          |      |
|------------|----------------------------------------------|--------|----------|------|
| SS1G_03122 | Nucleic acid binding                         | -1.501 | 1.27E-03 | Down |
| SS1G_05163 | DNA photolyase                               | -1.502 | 2.68E-04 | Down |
| SS1G_10051 | Hypothetical protein                         | -1.504 | 4.17E-04 | Down |
| SS1G_12551 | Ribonucleoprotein                            | -1.504 | 1.50E-03 | Down |
| SS1G_00995 | Ribosomal protein                            | -1.504 | 6.16E-04 | Down |
| SS1G_14484 | Hypothetical protein                         | -1.505 | 3.71E-05 | Down |
| SS1G_10332 | Hypothetical protein                         | -1.510 | 2.64E-03 | Down |
| SS1G_03464 | Hypothetical protein                         | -1.513 | 1.38E-06 | Down |
| SS1G_06628 | Hypothetical protein                         | -1.513 | 7.19E-06 | Down |
| SS1G_01348 | Orotate phosphoribosyltransferase            | -1.514 | 6.91E-06 | Down |
| SS1G_01764 | Enzyme modulator                             | -1.515 | 2.61E-03 | Down |
| SS1G_04471 | Hypothetical protein                         | -1.517 | 1.50E-04 | Down |
| SS1G_02270 | Hypothetical protein                         | -1.518 | 2.13E-03 | Down |
| SS1G_01711 | Resistance to glucose repression protein 1   | -1.518 | 3.31E-07 | Down |
| SS1G_02099 | Ribosome biogenesis protein                  | -1.519 | 2.22E-05 | Down |
| SS1G_06975 | Hypothetical protein                         | -1.524 | 5.34E-07 | Down |
| SS1G_03480 | Hypothetical protein                         | -1.524 | 6.58E-04 | Down |
| SS1G_09557 | Lipase                                       | -1.526 | 1.36E-03 | Down |
| SS1G_00185 | Deoxynucleotidyltransferase terminal-interac | -1.526 | 3.63E-04 | Down |
| SS1G_07841 | MYB protein                                  | -1.527 | 1.38E-06 | Down |
| SS1G_04595 | Hypothetical protein                         | -1.527 | 2.12E-07 | Down |
| SS1G_04626 | Hypothetical protein                         | -1.527 | 4.56E-04 | Down |
| SS1G_06311 | RNA binding protein                          | -1.530 | 5.66E-06 | Down |
| SS1G_14122 | Glucosamine 6-phosphate N-acetyltransferas   | -1.530 | 3.71E-05 | Down |
| SS1G_02664 | Hypothetical protein                         | -1.530 | 1.09E-04 | Down |
| SS1G_02854 | Hypothetical protein                         | -1.533 | 9.27E-05 | Down |
| SS1G_04019 | Mitochondrial carrier protein RIM2           | -1.536 | 3.67E-04 | Down |
| SS1G_03491 | Hypothetical protein                         | -1.540 | 1.03E-04 | Down |
| SS1G_06287 | Dehydrogenase                                | -1.546 | 8.47E-04 | Down |
| SS1G_12768 | Hypothetical protein                         | -1.547 | 5.94E-05 | Down |
| SS1G_03293 | Hypothetical protein                         | -1.551 | 1.06E-03 | Down |
| SS1G_01889 | Transferase                                  | -1.552 | 3.20E-08 | Down |
| SS1G_01089 | Hypothetical protein                         | -1.552 | 1.43E-04 | Down |
| SS1G_13413 | Hypothetical protein                         | -1.556 | 1.01E-03 | Down |
| SS1G_10526 | ATP-dependent RNA helicase DBP3              | -1.559 | 1.05E-04 | Down |
| SS1G_04472 | Hypothetical protein                         | -1.560 | 7.73E-04 | Down |
| SS1G_07712 | Periodic tryptophan protein 2 homolog        | -1.561 | 1.73E-04 | Down |
| SS1G_10321 | Hypothetical protein                         | -1.565 | 1.26E-04 | Down |
| SS1G_05890 | Hypothetical protein                         | -1.567 | 2.48E-06 | Down |
| SS1G_05915 | Glucosidase                                  | -1.571 | 2.18E-04 | Down |
| SS1G_11802 | Hypothetical protein                         | -1.572 | 1.50E-07 | Down |
| SS1G_14039 | ATP-dependent RNA helicase dbp7              | -1.573 | 1.47E-03 | Down |
| SS1G_11752 | Hypothetical protein                         | -1.573 | 1.24E-07 | Down |
| SS1G_03305 | Hypothetical protein                         | -1.574 | 3.47E-05 | Down |
| SS1G_09744 | Hypothetical protein                         | -1.577 | 1.60E-06 | Down |
| SS1G_04721 | Hypothetical protein                         | -1.577 | 2.83E-04 | Down |
| SS1G_13013 | Hypothetical protein                         | -1.578 | 2.77E-04 | Down |

|             |                                                      |        |          |      |
|-------------|------------------------------------------------------|--------|----------|------|
| SS1G_11245  | Hypothetical protein                                 | -1.584 | 1.42E-03 | Down |
| SS1G_08323  | ATP-dependent RNA helicase dbp4                      | -1.585 | 7.30E-04 | Down |
| SS1G_04161  | Methyltransferase                                    | -1.585 | 8.43E-06 | Down |
| SS1G_09791  | Hypothetical protein                                 | -1.586 | 4.87E-07 | Down |
| SS1G_03440  | Dehydrogenase                                        | -1.586 | 5.80E-03 | Down |
| SS1G_08822  | Large subunit GTPase 1 homolog                       | -1.590 | 5.32E-06 | Down |
| SS1G_13165  | Hypothetical protein                                 | -1.591 | 4.02E-03 | Down |
| SS1G_14123  | Hypothetical protein                                 | -1.592 | 7.22E-06 | Down |
| SS1G_13734  | Carbohydrate transporter                             | -1.594 | 2.58E-04 | Down |
| SS1G_12340  | ATP-dependent RNA helicase ROK1                      | -1.594 | 2.91E-04 | Down |
| SS1G_03118  | Pre-rRNA processing protein                          | -1.594 | 5.35E-04 | Down |
| SS1G_06986  | tRNA-splicing endonuclease subunit SEN15             | -1.597 | 1.33E-04 | Down |
| SS1G_11046  | Nucleic acid binding                                 | -1.601 | 3.42E-05 | Down |
| SS1G_07544  | RNA helicase                                         | -1.602 | 2.73E-03 | Down |
| SS1G_06802  | Hypothetical protein                                 | -1.603 | 1.63E-04 | Down |
| SS1G_04627  | Hypothetical protein                                 | -1.604 | 2.16E-05 | Down |
| SS1G_13414  | RNA methyltransferase                                | -1.605 | 1.16E-03 | Down |
| SS1G_02632  | Hypothetical protein                                 | -1.608 | 1.81E-05 | Down |
| SS1G_015443 | Hypothetical protein                                 | -1.610 | 3.78E-03 | Down |
| SS1G_08479  | tRNA-splicing endonuclease subunit Sen34             | -1.616 | 1.17E-04 | Down |
| SS1G_09201  | Hypothetical protein                                 | -1.618 | 8.90E-05 | Down |
| SS1G_04084  | Hypothetical protein                                 | -1.618 | 2.06E-06 | Down |
| SS1G_07742  | Ribosome production factor 2 homolog                 | -1.620 | 1.29E-04 | Down |
| SS1G_03773  | Hypothetical protein                                 | -1.620 | 3.07E-07 | Down |
| SS1G_09064  | Nuclear transport factor 2 family protein            | -1.620 | 1.03E-03 | Down |
| SS1G_03815  | U3 small nucleolar ribonucleoprotein protein         | -1.623 | 4.30E-04 | Down |
| SS1G_00436  | 60s ribosomal subunit assembly/export prote          | -1.624 | 5.20E-05 | Down |
| SS1G_12070  | ATP-binding cassette (ABC) transporter               | -1.625 | 2.87E-04 | Down |
| SS1G_10389  | Hypothetical protein                                 | -1.630 | 1.46E-06 | Down |
| SS1G_09792  | K <sup>+</sup> -H <sup>+</sup> exchange-like protein | -1.633 | 3.87E-04 | Down |
| SS1G_14217  | Neuroguidin                                          | -1.634 | 2.89E-04 | Down |
| SS1G_00825  | Hypothetical protein                                 | -1.636 | 7.22E-04 | Down |
| SS1G_10390  | Hypothetical protein                                 | -1.637 | 4.59E-06 | Down |
| SS1G_01657  | Linoleate diol synthase                              | -1.637 | 7.88E-06 | Down |
| SS1G_02283  | Hypothetical protein                                 | -1.640 | 2.07E-03 | Down |
| SS1G_01524  | Endodeoxyribonuclease                                | -1.640 | 2.21E-04 | Down |
| SS1G_03037  | Hypothetical protein                                 | -1.641 | 2.88E-05 | Down |
| SS1G_06778  | Hypothetical protein                                 | -1.644 | 1.92E-04 | Down |
| SS1G_09558  | Pre-rRNA-processing protein TSR2 homolog             | -1.644 | 8.09E-06 | Down |
| SS1G_06425  | ATP-dependent RNA helicase dbp9                      | -1.645 | 1.34E-04 | Down |
| SS1G_01857  | Hypothetical protein                                 | -1.646 | 7.35E-04 | Down |
| SS1G_04291  | Mitochondrial distribution and morphology p          | -1.647 | 1.14E-04 | Down |
| SS1G_07235  | Hypothetical protein                                 | -1.654 | 3.15E-04 | Down |
| SS1G_06193  | Hypothetical protein                                 | -1.657 | 1.10E-03 | Down |
| SS1G_10992  | Metacaspase-1                                        | -1.658 | 5.09E-05 | Down |
| SS1G_11274  | Hypothetical protein                                 | -1.658 | 5.65E-04 | Down |
| SS1G_12276  | Hypothetical protein                                 | -1.659 | 8.87E-06 | Down |

|             |                                              |        |          |      |
|-------------|----------------------------------------------|--------|----------|------|
| SS1G_02973  | Hypothetical protein                         | -1.659 | 8.10E-05 | Down |
| SS1G_03294  | Small RAS GTPase                             | -1.661 | 7.63E-04 | Down |
| SS1G_08322  | ATP-dependent RNA helicase dbp10             | -1.662 | 2.41E-03 | Down |
| SS1G_05229  | Hypothetical protein                         | -1.667 | 1.07E-05 | Down |
| SS1G_014508 | Hypothetical protein                         | -1.670 | 4.70E-07 | Down |
| SS1G_03766  | RRO15-like protein                           | -1.672 | 7.82E-05 | Down |
| SS1G_10199  | Nuclear valosin-containing protein           | -1.672 | 3.48E-04 | Down |
| SS1G_09166  | Hypothetical protein                         | -1.673 | 1.16E-04 | Down |
| SS1G_01283  | Hypothetical protein                         | -1.674 | 1.10E-06 | Down |
| SS1G_07027  | Hypothetical protein                         | -1.675 | 1.41E-07 | Down |
| SS1G_03435  | Transporter                                  | -1.676 | 5.81E-04 | Down |
| SS1G_016130 | Hypothetical protein                         | -1.678 | 1.12E-04 | Down |
| SS1G_06566  | Hypothetical protein                         | -1.681 | 4.24E-06 | Down |
| SS1G_05631  | U3 small nucleolar RNA-interacting protein 2 | -1.682 | 4.56E-04 | Down |
| SS1G_08570  | Protein bcp1                                 | -1.682 | 7.44E-05 | Down |
| SS1G_09465  | Hypothetical protein                         | -1.682 | 4.20E-03 | Down |
| SS1G_13972  | Hypothetical protein                         | -1.682 | 1.24E-03 | Down |
| SS1G_14483  | Hypothetical protein                         | -1.682 | 9.50E-05 | Down |
| SS1G_09029  | Hypothetical protein                         | -1.683 | 2.76E-04 | Down |
| SS1G_07522  | Transporter                                  | -1.684 | 7.51E-04 | Down |
| SS1G_09121  | Aldo-keto reductase                          | -1.686 | 1.61E-05 | Down |
| SS1G_02359  | Transmembrane protein 53                     | -1.688 | 5.82E-03 | Down |
| SS1G_09190  | Carbohydrate kinase                          | -1.688 | 2.37E-06 | Down |
| SS1G_07355  | Ph-response transcription factor pacc/rim101 | -1.689 | 1.01E-04 | Down |
| SS1G_10075  | ATP-dependent RNA helicase                   | -1.691 | 4.81E-03 | Down |
| SS1G_04983  | U3 small nucleolar RNA-associated protein 15 | -1.692 | 1.66E-04 | Down |
| SS1G_01347  | Nucleolar GTP-binding protein 1              | -1.695 | 2.32E-05 | Down |
| SS1G_02886  | Glycine-rich RNA-binding protein             | -1.695 | 6.37E-13 | Down |
| SS1G_11478  | Ankyrin-2                                    | -1.699 | 2.33E-04 | Down |
| SS1G_04940  | Hypothetical protein                         | -1.700 | 5.81E-04 | Down |
| SS1G_08623  | DNA-directed RNA polymerase                  | -1.701 | 4.20E-05 | Down |
| SS1G_05110  | Mannan endo-1,6-alpha-mannosidase            | -1.706 | 9.94E-07 | Down |
| SS1G_07511  | Hypothetical protein                         | -1.706 | 4.13E-07 | Down |
| SS1G_08110  | Hypothetical protein                         | -1.706 | 2.03E-04 | Down |
| SS1G_09841  | Hypothetical protein                         | -1.707 | 5.53E-03 | Down |
| SS1G_13028  | Hypothetical protein                         | -1.707 | 2.27E-03 | Down |
| SS1G_09602  | Protein DOM34 homolog                        | -1.707 | 1.16E-05 | Down |
| SS1G_03774  | Hypothetical protein                         | -1.711 | 1.87E-04 | Down |
| SS1G_14344  | RRP12-like protein                           | -1.711 | 1.21E-04 | Down |
| SS1G_13166  | 2-dehydropantoate 2-reductase-related protei | -1.712 | 2.13E-05 | Down |
| SS1G_04290  | RNA-binding protein PNO1                     | -1.713 | 1.99E-05 | Down |
| SS1G_01671  | Hypothetical protein                         | -1.715 | 4.56E-04 | Down |
| SS1G_00416  | Hypothetical protein                         | -1.719 | 8.35E-03 | Down |
| SS1G_05913  | Hypothetical protein                         | -1.724 | 3.18E-04 | Down |
| SS1G_02959  | DNA-directed RNA polymerase                  | -1.724 | 4.58E-06 | Down |
| SS1G_00363  | Polyadenylate-binding protein                | -1.726 | 6.21E-07 | Down |
| SS1G_13459  | Flotillin-like protein 1                     | -1.728 | 6.68E-05 | Down |

|            |                                              |        |          |      |
|------------|----------------------------------------------|--------|----------|------|
| SS1G_05099 | WD repeat-containing protein 46              | -1.730 | 1.81E-05 | Down |
| SS1G_01734 | Hypothetical protein                         | -1.732 | 4.81E-03 | Down |
| SS1G_10361 | Hypothetical protein                         | -1.732 | 4.74E-03 | Down |
| SS1G_00057 | Lipase                                       | -1.741 | 4.63E-06 | Down |
| SS1G_01881 | MYB-binding protein 1A                       | -1.741 | 2.32E-04 | Down |
| SS1G_14323 | Hypothetical protein                         | -1.748 | 5.21E-03 | Down |
| SS1G_07025 | Hypothetical protein                         | -1.748 | 6.20E-05 | Down |
| SS1G_01816 | Cysteine protease                            | -1.753 | 1.49E-09 | Down |
| SS1G_01658 | Hypothetical protein                         | -1.755 | 3.60E-07 | Down |
| SS1G_09143 | Hypothetical protein                         | -1.756 | 6.54E-08 | Down |
| SS1G_07406 | ProteinKRI1 homolog                          | -1.758 | 5.21E-04 | Down |
| SS1G_05474 | Hypothetical protein                         | -1.763 | 1.32E-05 | Down |
| SS1G_06095 | Hypothetical protein                         | -1.763 | 4.94E-06 | Down |
| SS1G_03082 | Ribosome biogenesis protein ytm1             | -1.766 | 7.68E-05 | Down |
| SS1G_06567 | ATP-dependent rRNA helicase rrp3             | -1.769 | 3.68E-05 | Down |
| SS1G_07247 | Hypothetical protein                         | -1.769 | 5.84E-04 | Down |
| SS1G_13001 | Transcriptional regulatory protein moc3      | -1.772 | 5.20E-05 | Down |
| SS1G_08632 | Hypothetical protein                         | -1.773 | 2.16E-05 | Down |
| SS1G_13820 | Hypothetical protein                         | -1.774 | 6.93E-03 | Down |
| SS1G_10999 | U3 small nucleolar RNA-associated protein 22 | -1.776 | 1.39E-03 | Down |
| SS1G_02048 | Transporter                                  | -1.777 | 8.90E-05 | Down |
| SS1G_01720 | Sulfite efflux pump                          | -1.779 | 8.78E-03 | Down |
| SS1G_09680 | Nucleolar complex protein 3 homolog          | -1.780 | 1.37E-04 | Down |
| SS1G_05100 | Pre-rRNA-processing protein TSR1             | -1.781 | 1.25E-06 | Down |
| SS1G_07969 | Hypothetical protein                         | -1.785 | 3.99E-07 | Down |
| SS1G_02988 | Hypothetical protein                         | -1.787 | 1.86E-03 | Down |
| SS1G_02902 | Transcription factor                         | -1.788 | 1.60E-05 | Down |
| SS1G_13224 | Hypothetical protein                         | -1.795 | 3.70E-09 | Down |
| SS1G_09035 | Nucleolar protein 4                          | -1.797 | 2.27E-04 | Down |
| SS1G_11303 | Hypothetical protein                         | -1.799 | 2.59E-08 | Down |
| SS1G_02533 | Nucleolar GTP-binding protein 2              | -1.805 | 2.18E-04 | Down |
| SS1G_03321 | Hypothetical protein                         | -1.805 | 2.88E-05 | Down |
| SS1G_08823 | Protein ITV1 homolog                         | -1.806 | 6.89E-06 | Down |
| SS1G_12214 | Nucleolar protein 58                         | -1.807 | 1.27E-05 | Down |
| SS1G_02092 | Hypothetical protein                         | -1.807 | 8.63E-05 | Down |
| SS1G_02284 | Transcription factor                         | -1.811 | 3.01E-04 | Down |
| SS1G_00361 | Hypothetical protein                         | -1.814 | 1.01E-04 | Down |
| SS1G_01564 | Guanine nucleotide-binding protein           | -1.814 | 5.73E-05 | Down |
| SS1G_01210 | Phosphatase                                  | -1.817 | 5.39E-06 | Down |
| SS1G_00362 | Hypothetical protein                         | -1.818 | 5.87E-05 | Down |
| SS1G_07874 | Hypothetical protein                         | -1.818 | 4.59E-07 | Down |
| SS1G_12560 | Hypothetical protein                         | -1.819 | 1.44E-06 | Down |
| SS1G_12778 | Hypothetical protein                         | -1.820 | 9.91E-03 | Down |
| SS1G_02382 | ABC transporter G family member              | -1.820 | 4.42E-05 | Down |
| SS1G_12417 | Hypothetical protein                         | -1.827 | 3.75E-05 | Down |
| SS1G_00845 | Hypothetical protein                         | -1.834 | 1.81E-05 | Down |
| SS1G_02235 | Nucleolar protein 10                         | -1.834 | 8.09E-05 | Down |

|            |                                              |        |          |      |
|------------|----------------------------------------------|--------|----------|------|
| SS1G_13732 | Endochitinase                                | -1.838 | 7.50E-05 | Down |
| SS1G_02848 | Hypothetical protein                         | -1.841 | 1.01E-08 | Down |
| SS1G_00678 | Something about silencing protein 10         | -1.845 | 5.08E-05 | Down |
| SS1G_12994 | U3 small nucleolar RNA-associated protein 4  | -1.849 | 5.32E-05 | Down |
| SS1G_02383 | ABC transporter G family member              | -1.851 | 1.48E-05 | Down |
| SS1G_13924 | mRNA splicing factor                         | -1.855 | 3.75E-05 | Down |
| SS1G_08782 | Protein mak16                                | -1.860 | 1.25E-04 | Down |
| SS1G_12786 | Hypothetical protein                         | -1.861 | 8.94E-03 | Down |
| SS1G_00317 | Nuclease                                     | -1.862 | 1.56E-04 | Down |
| SS1G_07812 | Fukutin                                      | -1.863 | 9.74E-04 | Down |
| SS1G_04436 | RNA binding protein                          | -1.863 | 6.06E-05 | Down |
| SS1G_04164 | Protein pxr1                                 | -1.868 | 1.71E-05 | Down |
| SS1G_08552 | Hypothetical protein                         | -1.870 | 1.01E-05 | Down |
| SS1G_02358 | Transporter                                  | -1.884 | 3.08E-03 | Down |
| SS1G_07448 | Hypothetical protein                         | -1.891 | 1.48E-05 | Down |
| SS1G_04473 | Hypothetical protein                         | -1.892 | 5.23E-06 | Down |
| SS1G_08391 | Tumor suppressor candidate protein           | -1.893 | 1.76E-05 | Down |
| SS1G_06909 | Hypothetical protein                         | -1.894 | 1.18E-07 | Down |
| SS1G_04356 | Pescadillo homolog                           | -1.895 | 5.37E-06 | Down |
| SS1G_03691 | Hypothetical protein                         | -1.896 | 6.28E-03 | Down |
| SS1G_10150 | RNA helicase                                 | -1.897 | 8.41E-06 | Down |
| SS1G_02987 | Hypothetical protein                         | -1.905 | 2.81E-05 | Down |
| SS1G_12540 | ATP-dependent RNA helicase drs1              | -1.907 | 1.17E-05 | Down |
| SS1G_05304 | Aromatic peroxygenase                        | -1.909 | 1.46E-13 | Down |
| SS1G_12476 | Hypothetical protein                         | -1.910 | 2.05E-06 | Down |
| SS1G_11991 | Oxidoreductase                               | -1.912 | 6.06E-05 | Down |
| SS1G_01694 | Hypothetical protein                         | -1.912 | 3.96E-06 | Down |
| SS1G_05865 | tRNA-dihydrouridine(47) synthase [NAD(P)(+)] | -1.913 | 1.61E-05 | Down |
| SS1G_00071 | ATP-dependent RNA helicase dbp2              | -1.918 | 2.05E-06 | Down |
| SS1G_01745 | Decarboxylase                                | -1.930 | 5.42E-14 | Down |
| SS1G_00351 | Hypothetical protein                         | -1.931 | 2.33E-05 | Down |
| SS1G_00639 | Ribonucleoprotein                            | -1.934 | 3.15E-05 | Down |
| SS1G_04857 | Endopolygalacturonase                        | -1.934 | 4.44E-06 | Down |
| SS1G_02682 | Mannan endo-1,6-alpha-mannosidase            | -1.946 | 1.33E-04 | Down |
| SS1G_01835 | Translation initiation factor                | -1.946 | 2.91E-08 | Down |
| SS1G_04762 | Hypothetical protein                         | -1.949 | 2.43E-04 | Down |
| SS1G_05854 | WD repeat-containing protein 75              | -1.950 | 1.58E-05 | Down |
| SS1G_07286 | Hypothetical protein                         | -1.951 | 2.98E-04 | Down |
| SS1G_04139 | Nucleolar protein 14                         | -1.951 | 9.71E-05 | Down |
| SS1G_12287 | Hypothetical protein                         | -1.952 | 1.51E-09 | Down |
| SS1G_06457 | Vacuolar protein sorting-associated protein  | -1.955 | 6.90E-07 | Down |
| SS1G_14329 | WD repeat-containing protein 43              | -1.956 | 2.71E-05 | Down |
| SS1G_14385 | Transcription factor                         | -1.962 | 7.62E-05 | Down |
| SS1G_09887 | Hypothetical protein                         | -1.964 | 6.66E-03 | Down |
| SS1G_03009 | DNA-directed RNA polymerase                  | -1.964 | 9.80E-25 | Down |
| SS1G_05105 | Hypothetical protein                         | -1.973 | 1.24E-03 | Down |
| SS1G_08624 | Hypothetical protein                         | -1.978 | 1.36E-03 | Down |

|            |                                               |        |          |      |
|------------|-----------------------------------------------|--------|----------|------|
| SS1G_08193 | Phospholipase D                               | -1.982 | 8.63E-05 | Down |
| SS1G_13549 | Hypothetical protein                          | -1.987 | 5.87E-05 | Down |
| SS1G_02351 | Importin-4                                    | -1.987 | 2.69E-07 | Down |
| SS1G_11781 | Amino acid transporter                        | -1.993 | 1.45E-07 | Down |
| SS1G_14068 | ESF1 homolog                                  | -1.996 | 6.54E-06 | Down |
| SS1G_13144 | Hypothetical protein                          | -1.997 | 6.73E-05 | Down |
| SS1G_11737 | Hypothetical protein                          | -1.997 | 8.54E-17 | Down |
| SS1G_03893 | Hypothetical protein                          | -1.998 | 7.43E-06 | Down |
| SS1G_01822 | rRNA-processing protein                       | -2.011 | 1.04E-07 | Down |
| SS1G_01682 | tRNA adenine methyltransferase catalytic sul  | -2.012 | 2.53E-05 | Down |
| SS1G_11246 | Methyltransferase                             | -2.016 | 1.20E-06 | Down |
| SS1G_08142 | Hypothetical protein                          | -2.016 | 6.74E-06 | Down |
| SS1G_10391 | Hypothetical protein                          | -2.017 | 8.98E-05 | Down |
| SS1G_06776 | Pumilio homolog 3                             | -2.022 | 2.90E-05 | Down |
| SS1G_11736 | Nucleolar protein 9                           | -2.023 | 5.01E-14 | Down |
| SS1G_05969 | Hypothetical protein                          | -2.026 | 9.29E-04 | Down |
| SS1G_08188 | Dehydrogenase                                 | -2.031 | 1.46E-04 | Down |
| SS1G_06620 | Carbohydrate transporter                      | -2.037 | 1.34E-03 | Down |
| SS1G_07557 | Ribosomal protein                             | -2.041 | 1.44E-06 | Down |
| SS1G_11815 | Hypothetical protein                          | -2.046 | 1.83E-06 | Down |
| SS1G_03439 | Hypothetical protein                          | -2.047 | 9.93E-04 | Down |
| SS1G_06728 | Transporter                                   | -2.052 | 4.55E-03 | Down |
| SS1G_00252 | DNA-directed RNA polymerase I subunit         | -2.053 | 5.14E-07 | Down |
| SS1G_03775 | Hypothetical protein                          | -2.056 | 5.04E-07 | Down |
| SS1G_09525 | Hypothetical protein                          | -2.057 | 4.92E-05 | Down |
| SS1G_06841 | Amino acid transporter                        | -2.062 | 7.81E-08 | Down |
| SS1G_10506 | Hypothetical protein                          | -2.064 | 4.49E-06 | Down |
| SS1G_09799 | Hypothetical protein                          | -2.085 | 2.56E-04 | Down |
| SS1G_01834 | Ubiquitin carboxyl-terminal hydrolase         | -2.088 | 1.53E-09 | Down |
| SS1G_11751 | Hypothetical protein                          | -2.090 | 1.18E-04 | Down |
| SS1G_01733 | Hypothetical protein                          | -2.098 | 5.04E-07 | Down |
| SS1G_13470 | Hypothetical protein                          | -2.098 | 1.02E-06 | Down |
| SS1G_14069 | ESF1 homolog                                  | -2.107 | 7.75E-06 | Down |
| SS1G_09888 | U3 small nucleolar RNA-associated protein 1&  | -2.116 | 4.14E-06 | Down |
| SS1G_09508 | Hypothetical protein                          | -2.119 | 1.92E-03 | Down |
| SS1G_07285 | Hypothetical protein                          | -2.121 | 9.58E-06 | Down |
| SS1G_02495 | Peroxidase                                    | -2.124 | 5.92E-08 | Down |
| SS1G_11064 | Hypothetical protein                          | -2.126 | 3.44E-04 | Down |
| SS1G_01537 | Hypothetical protein                          | -2.128 | 9.42E-05 | Down |
| SS1G_05921 | Hypothetical protein                          | -2.129 | 1.37E-07 | Down |
| SS1G_03045 | Hypothetical protein                          | -2.129 | 5.34E-04 | Down |
| SS1G_11673 | Hypothetical protein                          | -2.133 | 7.96E-04 | Down |
| SS1G_08280 | Hypothetical protein                          | -2.145 | 3.02E-03 | Down |
| SS1G_04205 | Protein HGH1 homolog                          | -2.146 | 6.90E-07 | Down |
| SS1G_12776 | Hypothetical protein                          | -2.151 | 1.18E-03 | Down |
| SS1G_05985 | P21-activated protein kinase-interacting prot | -2.158 | 7.12E-06 | Down |
| SS1G_05094 | Dehydrogenase                                 | -2.164 | 5.83E-05 | Down |

|            |                                              |        |          |      |
|------------|----------------------------------------------|--------|----------|------|
| SS1G_08220 | Hypothetical protein                         | -2.177 | 4.64E-06 | Down |
| SS1G_01759 | Sugar transporter                            | -2.184 | 7.82E-05 | Down |
| SS1G_03941 | Aspartic protease                            | -2.187 | 7.15E-11 | Down |
| SS1G_07446 | Hypothetical protein                         | -2.194 | 5.28E-08 | Down |
| SS1G_12561 | Hypothetical protein                         | -2.202 | 8.50E-09 | Down |
| SS1G_10998 | 20s rRNA accumulation protein 4              | -2.210 | 1.74E-06 | Down |
| SS1G_07876 | Hypothetical protein                         | -2.213 | 4.65E-05 | Down |
| SS1G_12791 | Hypothetical protein                         | -2.222 | 2.28E-05 | Down |
| SS1G_08187 | Hypothetical protein                         | -2.234 | 4.75E-05 | Down |
| SS1G_08952 | Hypothetical protein                         | -2.235 | 1.22E-05 | Down |
| SS1G_01264 | Chromaffin granule amine transporter         | -2.242 | 2.48E-09 | Down |
| SS1G_03942 | Hypothetical protein                         | -2.244 | 2.21E-10 | Down |
| SS1G_03455 | Non-receptor serine/threonine protein kinase | -2.245 | 3.49E-06 | Down |
| SS1G_04923 | Hypothetical protein                         | -2.267 | 1.52E-17 | Down |
| SS1G_07873 | RNA-binding protein                          | -2.272 | 1.31E-06 | Down |
| SS1G_05067 | Hypothetical protein                         | -2.293 | 5.08E-05 | Down |
| SS1G_12790 | Methyltransferase                            | -2.296 | 4.44E-06 | Down |
| SS1G_01676 | <i>C. elegans</i> chromodomain protein       | -2.299 | 7.83E-08 | Down |
| SS1G_13477 | Transmembrane protein                        | -2.303 | 5.03E-10 | Down |
| SS1G_02117 | Carbohydrate transporter                     | -2.313 | 5.46E-05 | Down |
| SS1G_02541 | Hypothetical protein                         | -2.326 | 4.98E-08 | Down |
| SS1G_10155 | Polyamine transporter 1                      | -2.359 | 1.30E-06 | Down |
| SS1G_06527 | Hypothetical protein                         | -2.366 | 1.25E-03 | Down |
| SS1G_11780 | Hypothetical protein                         | -2.368 | 1.61E-09 | Down |
| SS1G_00864 | Amino acid transporter                       | -2.379 | 1.18E-07 | Down |
| SS1G_00872 | Hypothetical protein                         | -2.387 | 9.73E-14 | Down |
| SS1G_05211 | Hypothetical protein                         | -2.399 | 5.66E-06 | Down |
| SS1G_11030 | Gemini, isoform C                            | -2.403 | 1.60E-10 | Down |
| SS1G_07021 | Hypothetical protein                         | -2.403 | 9.39E-06 | Down |
| SS1G_07447 | Hypothetical protein                         | -2.419 | 4.95E-10 | Down |
| SS1G_12506 | Hypothetical protein                         | -2.422 | 2.62E-04 | Down |
| SS1G_07445 | Hypothetical protein                         | -2.441 | 4.87E-07 | Down |
| SS1G_07412 | 3',5'-cyclic-nucleotide phosphodiesterase    | -2.442 | 1.92E-06 | Down |
| SS1G_05227 | Hypothetical protein                         | -2.444 | 2.22E-05 | Down |
| SS1G_07022 | Hypothetical protein                         | -2.475 | 2.21E-06 | Down |
| SS1G_03709 | Hypothetical protein                         | -2.482 | 1.26E-04 | Down |
| SS1G_00769 | Hypothetical protein                         | -2.532 | 3.98E-05 | Down |
| SS1G_05237 | Phosphatase                                  | -2.545 | 1.27E-05 | Down |
| SS1G_07463 | Lipase                                       | -2.593 | 1.84E-06 | Down |
| SS1G_07462 | Hypothetical protein                         | -2.610 | 5.99E-08 | Down |
| SS1G_10125 | Carbohydrate transporter                     | -2.610 | 2.98E-10 | Down |
| SS1G_01755 | Hypothetical protein                         | -2.614 | 4.80E-06 | Down |
| SS1G_08282 | Glucosidase                                  | -2.627 | 5.37E-06 | Down |
| SS1G_00768 | Hypothetical protein                         | -2.679 | 1.89E-07 | Down |
| SS1G_01576 | Oxidase                                      | -2.694 | 6.42E-10 | Down |
| SS1G_07667 | Clock-controlled protein 6                   | -2.721 | 1.26E-15 | Down |
| SS1G_12513 | LysM domain-containing protein               | -2.739 | 1.02E-10 | Down |



|             |                          |        |          |      |
|-------------|--------------------------|--------|----------|------|
| SS1G_01032  | Hypothetical protein     | -2.820 | 5.68E-05 | Down |
| SS1G_04683  | Hypothetical protein     | -2.835 | 1.01E-10 | Down |
| SS1G_07359  | Hypothetical protein     | -2.948 | 5.86E-10 | Down |
| SS1G_11789  | Acyltransferase          | -3.092 | 1.62E-07 | Down |
| SS1G_01754  | Hypothetical protein     | -3.161 | 9.88E-13 | Down |
| SS1G_01651  | Transporter              | -3.177 | 6.43E-11 | Down |
| SS1G_05917  | Hypothetical protein     | -3.190 | 3.12E-18 | Down |
| SS1G_01382  | Serine protease          | -3.252 | 5.64E-09 | Down |
| SS1G_016850 | Hypothetical protein     | -3.304 | 7.54E-15 | Down |
| SS1G_02499  | Hypothetical protein     | -3.447 | 3.47E-21 | Down |
| SS1G_04053  | Lyase                    | -3.600 | 1.43E-13 | Down |
| SS1G_07295  | Hypothetical protein     | -3.640 | 1.06E-10 | Down |
| SS1G_08838  | Hypothetical protein     | -3.788 | 1.75E-19 | Down |
| SS1G_06453  | Hypothetical protein     | -3.824 | 1.59E-13 | Down |
| SS1G_03747  | Hypothetical protein     | -3.837 | 9.92E-15 | Down |
| SS1G_06412  | Hypothetical protein     | -3.866 | 5.94E-12 | Down |
| SS1G_13051  | Cellobiose dehydrogenase | -3.916 | 2.66E-11 | Down |

---

---

**Table S3.** Numbers of aligning small RNA sequence reads from virus-free and hypovirus-transfected *Sclerotinia sclerotiorum*

|                                              | Library      |        |              |        |                  |        |                  |        | Total      |        |
|----------------------------------------------|--------------|--------|--------------|--------|------------------|--------|------------------|--------|------------|--------|
|                                              | Virus-free_1 |        | Virus-free_2 |        | Virus-infected_1 |        | Virus-infected_2 |        |            |        |
|                                              | Count        | %      | Count        | %      | Count            | %      | Count            | %      | Count      | %      |
| Filtered reads                               | 23,834,355   |        | 19,972,296   |        | 24,093,727       |        | 22,463,731       |        | 90,364,109 |        |
| <i>S. sclerotiorum</i> genome                | 15,174,888   | 63.67% | 15,322,059   | 76.72% | 11,797,995       | 48.97% | 14,483,400       | 64.47% | 56,778,344 | 63.46% |
| Predicted coding sequences                   | 5,038,538    | 21.14% | 4,939,512    | 24.73% | 6,292,899        | 26.12% | 4,973,533        | 22.14% | 21,244,483 | 23.53% |
| Ribosomal RNA                                | 2,735,533    | 11.50% | 4,182,191    | 20.90% | 3,025,071        | 12.60% | 1,480,630        | 6.60%  | 11,423,425 | 12.90% |
| Predicted tRNAs                              | 5,475,657    | 22.97% | 4,746,585    | 23.77% | 3,507,677        | 14.56% | 9,799,798        | 43.62% | 23,529,717 | 26.04% |
| Retrotransposons                             | 1,385,373    | 5.80%  | 1,833,908    | 9.20%  | 961,857          | 4.00%  | 1,060,959        | 4.70%  | 5,242,097  | 5.93%  |
| Mitochondrial genome                         | 3,343,171    | 14.03% | 1,662,714    | 8.33%  | 3,835,055        | 15.92% | 2,771,460        | 12.34% | 11,612,400 | 12.85% |
| <i>Sclerotinia sclerotiorum</i> hypovirus 2L | NA           | NA     | NA           | NA     | 2,677,788        | 11.11% | 1,555,299        | 6.92%  | 4,233,087  | 9.02%  |

**Table S4.** Candidate microRNA sequence predicted from for *Sclerotinia sclerotiorum* small RNA sequence data by five miRNA prediction programs

| Name                 | Sequence                 | mirdeep | MiRDeep | miRDP | mireap | MiRPlant | Times    | Total   |
|----------------------|--------------------------|---------|---------|-------|--------|----------|----------|---------|
|                      |                          | 2       | *       |       |        |          | predicte |         |
| candidate_miRNA_0001 | AAUCCUUCUCUCUGCUCUUCGGC  | X       | X       | X     |        | X        | 4        | 156     |
| candidate_miRNA_0002 | CAAGGUCGCUGUGCAGUCAACC   | X       | X       | X     | X      |          | 4        | 40      |
| candidate_miRNA_0006 | AUCUAUCUUCUCUUCUCAAUUG   |         | X       | X     |        | X        | 3        | 29      |
| candidate_miRNA_0007 | GGCGUCGUGACGGAGUGGUU AAC |         | X       | X     |        | X        | 3        | 121,853 |
| candidate_miRNA_0008 | UAAAGGCUGCAGAUAGGUGAGG   | X       |         | X     |        | X        | 3        | 24      |
| candidate_miRNA_0009 | UAAGGUUUCGUCUGGUUGGUAA   |         | X       | X     |        | X        | 3        | 109     |
| candidate_miRNA_0010 | UAAUGGUUAUAGACUUCUGCCA   |         | X       | X     |        | X        | 3        | 46      |
| candidate_miRNA_0011 | UACCUAGUAGACAUUCGUGUAAC  | X       |         | X     |        | X        | 3        | 31      |
| candidate_miRNA_0012 | UAUGACGCUAAUGUGGGACAU A  | X       | X       | X     |        |          | 3        | 24      |
| candidate_miRNA_0013 | UCAAGACUCUGCACAUGGCACA   | X       |         | X     |        | X        | 3        | 30      |
| candidate_miRNA_0015 | UGAUGGAUAGACUGGAUAGCC    |         | X       | X     |        | X        | 3        | 124     |
| candidate_miRNA_0017 | UGGCGAUUGGAUUGGAGGCAGG   | X       | X       |       |        | X        | 3        | 21      |
| candidate_miRNA_0018 | UGUCGAGAUGCUGGAGCUGAAGC  | X       | X       |       |        | X        | 3        | 26      |
| candidate_miRNA_0019 | UUCACGAGUGCAUUUACAGACAG  | X       | X       | X     |        |          | 3        | 44      |
| candidate_miRNA_0020 | UUCAUUAUUAUAGGAUUGCA     |         | X       | X     |        | X        | 3        | 145     |
| candidate_miRNA_0021 | UCCAAGUGGAGACUGAGCUAC    |         | X       | X     |        | X        | 3        | 34      |
| candidate_miRNA_0022 | UCCGAAAGUCGAUCGACUCUU    | X       |         | X     | X      |          | 3        | 1,095   |
| candidate_miRNA_0023 | UUGUCGUCGUGCUAUGGCGC     | X       | X       | X     |        |          | 3        | 61      |
| candidate_miRNA_0024 | UUUCCCUGAGGU AUCCUGGCUA  | X       | X       |       |        | X        | 3        | 6,962   |
| candidate_miRNA_0027 | AGAAUAGUUUCAUAGUUUAGGAG  |         | X       |       |        | X        | 2        | 290     |
| candidate_miRNA_0028 | AGAUUCUGACUGUUAUGACCAG   |         |         | X     |        | X        | 2        | 26      |
| candidate_miRNA_0029 | AGUCAUUCUGAAUUCGAUCUG    |         |         | X     |        | X        | 2        | 34      |
| candidate_miRNA_0031 | AUCCGCACUCUUGAACCGAGUGG  |         | X       |       |        | X        | 2        | 276     |
| candidate_miRNA_0032 | CAAAGCUAUGGACCCGAGUACA   | X       |         |       |        | X        | 2        | 126     |
| candidate_miRNA_0033 | CACACUGUUUGGACGGAGAUAG   |         | X       | X     |        |          | 2        | 21      |
| candidate_miRNA_0034 | CAGGAACCAUUCACUUUAACAG   |         | X       |       |        | X        | 2        | 273     |
| candidate_miRNA_0035 | CAGUAUUCUUGAGUGUGACAG    |         | X       |       |        | X        | 2        | 206     |
| candidate_miRNA_0037 | CGGAGGUGUGAGGCGUCACAG    |         | X       |       |        | X        | 2        | 157     |
| candidate_miRNA_0038 | GUAAGUUAUGCGGACUGUGCUU   | X       |         | X     |        |          | 2        | 161     |
| candidate_miRNA_0040 | UAAUGAGAAUAUCGUCUGUAGA   |         | X       | X     |        |          | 2        | 31      |
| candidate_miRNA_0047 | UACGGACUGAAUACGGAGUGGCC  |         | X       |       |        | X        | 2        | 29      |
| candidate_miRNA_0050 | UAGACCUUCGUGUUCUGGCUC    |         | X       |       |        | X        | 2        | 97      |
| candidate_miRNA_0051 | UAGACGGCAAACCU CGUAACAAA |         |         | X     |        | X        | 2        | 30      |
| candidate_miRNA_0052 | UAGAGGUUAGAUGUCAUGUACU   | X       |         | X     |        |          | 2        | 115     |
| candidate_miRNA_0053 | UAGCGCGGCAGUGGCAACAUGC   | X       |         | X     |        |          | 2        | 58      |
| candidate_miRNA_0055 | UAGGAUAAUUGUCCUGGGACAA   |         | X       |       |        | X        | 2        | 53      |
| candidate_miRNA_0056 | UAGGAUACCAUUAAGACUUUCAG  |         | X       |       |        | X        | 2        | 32      |
| candidate_miRNA_0058 | UAUACGGCUCGAGAGGACGGAUG  |         |         | X     |        | X        | 2        | 124     |
| candidate_miRNA_0061 | UAUGAGAUUUUGAUCAGGGUUG   |         | X       | X     |        |          | 2        | 80      |

Table S4 Continued

|                      |                          |   |  |   |   |        |       |        |
|----------------------|--------------------------|---|--|---|---|--------|-------|--------|
| candidate_miRNA_0062 | UCAAGUAGAAUUAUAGGUAAAAC  |   |  | X | 2 | 149    |       |        |
| candidate_miRNA_0063 | UCAAGUAGAAUGUAGAUAAAAC   |   |  | X | 2 | 146    |       |        |
| candidate_miRNA_0064 | UCAAUUACUAGAAUCUAAAAC    |   |  | X | 2 | 41     |       |        |
| candidate_miRNA_0066 | UCAUCCAGAUCGUAAGUAAAAGC  | X |  |   | X | 2      | 54    |        |
| candidate_miRNA_0067 | UCAUGUGGAAGUGCUCUAGGC    |   |  | X | 2 | 3,473  |       |        |
| candidate_miRNA_0069 | UCCACAUGAUCUAGACGGCAAAC  |   |  | X | 2 | 3,955  |       |        |
| candidate_miRNA_0070 | UCCCUCGUUGGAGCCACAAAAG   |   |  | X | 2 | 71     |       |        |
| candidate_miRNA_0073 | UCGAGAUGUUGUCAAUUCGUUGC  |   |  | X | 2 | 83     |       |        |
| candidate_miRNA_0074 | UCGAGGUAGUUUAUAACUAGGCG  |   |  | X | 2 | 76,317 |       |        |
| candidate_miRNA_0075 | UCGAGGUGGUUUUAUAACUAGACG |   |  | X | 2 | 30,174 |       |        |
| candidate_miRNA_0077 | UCUAGGAGCUUUGAGGGCUC     |   |  | X | 2 | 56     |       |        |
| candidate_miRNA_0079 | UCUCCUAGGAUAAUUUAACUCC   |   |  | X | 2 | 30     |       |        |
| candidate_miRNA_0080 | UCUCCUGGGAUAAUUAACUCC    |   |  | X | 2 | 30     |       |        |
| candidate_miRNA_0081 | UCUCGAGAUUAGAACUUAUUGC   |   |  | X | 2 | 39     |       |        |
| candidate_miRNA_0082 | UCUCUUGGAUCUACUGGAUCUA   |   |  | X | 2 | 23     |       |        |
| candidate_miRNA_0083 | UGAACUGAUCAAUAGCUACAUC   | X |  |   | X | 2      | 33    |        |
| candidate_miRNA_0084 | UGACACUUUCAAGAAUUGGAUG   |   |  | X | X | 2      | 2,485 |        |
| candidate_miRNA_0085 | UGACCGUAUCGAAUUAUUUGAGC  |   |  | X | X | 2      | 20    |        |
| candidate_miRNA_0086 | UGACUAGUGGGACUUUUCACU    | X |  |   | X | 2      | 197   |        |
| candidate_miRNA_0087 | UGACUUGUUCUUUCUUUGAAUC   | X |  |   | X | 2      | 1,222 |        |
| candidate_miRNA_0089 | UGAGAGAGCUUUGUAUGUACAUC  | X |  |   | X | 2      | 101   |        |
| candidate_miRNA_0091 | UGAUGAAUCGAUGGGAAAGGAUA  |   |  |   | X | 2      | 31    |        |
| candidate_miRNA_0092 | UGAUUAUAUAGACCUUCGUGC    |   |  | X |   | X      | 2     | 693    |
| candidate_miRNA_0093 | UGAUUGAUCUUGAUCUUGAUC    |   |  |   | X | X      | 2     | 64     |
| candidate_miRNA_0095 | UGCCGUCUAGAUAUGUGGAAG    | X |  |   |   | X      | 2     | 15,712 |
| candidate_miRNA_0096 | UGCGGGUUCGUUUGGAUGUAUG   |   |  | X | X |        | 2     | 37     |
| candidate_miRNA_0097 | UGCUCAGUUGUUCUGACUAGG    | X |  | X |   |        | 2     | 104    |
| candidate_miRNA_0098 | UGGAUUGUGCUUUUGUAAAAC    | X |  |   | X |        | 2     | 25     |
| candidate_miRNA_0099 | UGGCAAGGAUUAGUUUCUGUCC   | X |  | X |   |        | 2     | 41     |
| candidate_miRNA_0104 | UGGGGAAGGUCGCCUGAAGUCU   | X |  |   | X |        | 2     | 126    |
| candidate_miRNA_0105 | UGGGUUAUGUGCGAGAUGAUGAAC |   |  | X | X |        | 2     | 23     |
| candidate_miRNA_0106 | UGUACGCAUGGCUUCUUGAACA   |   |  | X |   | X      | 2     | 26     |
| candidate_miRNA_0107 | UGUAGAGGAGAGGUUGAAUAUG   |   |  | X | X |        | 2     | 212    |
| candidate_miRNA_0109 | UGUGUACUUGAGGAUUAUGCCC   |   |  | X |   | X      | 2     | 4,284  |
| candidate_miRNA_0110 | UUAAACCGGAUAGAGAAAGCUCU  |   |  |   | X | X      | 2     | 42     |
| candidate_miRNA_0112 | UUAGUAUACGAUUUAGGUGACC   |   |  | X |   | X      | 2     | 67     |
| candidate_miRNA_0113 | UUAGUCUCGUAGUUAAGGAGC    |   |  | X |   | X      | 2     | 728    |
| candidate_miRNA_0115 | UUGAGUAUGAAGAUUGAGCAUG   |   |  | X | X |        | 2     | 24     |
| candidate_miRNA_0116 | UUGAUUAUAUAGACCUUUGUGCC  |   |  | X | X |        | 2     | 282    |
| candidate_miRNA_0122 | UUGUGGUUUAGUGGUUAAUGU    |   |  | X |   | X      | 2     | 30     |
| candidate_miRNA_0123 | UUUGAGAGCUGAUAAGUUGGAUA  | X |  | X |   |        | 2     | 46     |
| candidate_miRNA_0129 | UAGCCUAGGAAUUCUGUUUCUG   |   |  |   | X |        | 1     | 32     |
| candidate_miRNA_0132 | AAGACUAGGUUUGAAGGGGAUAU  |   |  |   | X |        | 1     | 43     |

Table S4 Continued

|                      |                          |   |   |   |       |
|----------------------|--------------------------|---|---|---|-------|
| candidate_miRNA_0136 | AAGUCUUCCACCU CGCUCGACC  | X |   | 1 | 32    |
| candidate_miRNA_0137 | AAUCCGGAUUCGAUAGAAAUGG   |   | X | 1 | 28    |
| candidate_miRNA_0139 | ACAAGUAGAAUGUAGGUAAACU   |   | X | 1 | 32    |
| candidate_miRNA_0141 | ACAUGGAAGUGCUCUAGGCU     | X |   | 1 | 843   |
| candidate_miRNA_0142 | ACAUGGAAGUGCUCUAGGCUCU   |   | X | 1 | 124   |
| candidate_miRNA_0143 | ACCACAAAUAGCACGAUCGAUG   | X |   | 1 | 42    |
| candidate_miRNA_0150 | AGACCGAGGGGAUCGAAGGGAC   | X |   | 1 | 121   |
| candidate_miRNA_0152 | AGAGGAUUCGGGAAUGAGAAUU   | X |   | 1 | 53    |
| candidate_miRNA_0154 | AGAGGGAUCUUGGAAGAACACU   | X |   | 1 | 25    |
| candidate_miRNA_0157 | AGGACAUGCCAGAAUGCUUUGG   |   | X | 1 | 23    |
| candidate_miRNA_0160 | AGUUCGAUCGUCUAUGGAGCCAUC |   | X | 1 | 31    |
| candidate_miRNA_0162 | AGUUGAUUGUGCAUCUUGAGC    | X |   | 1 | 43    |
| candidate_miRNA_0163 | AGUUGGUUAGAGCGUUGGUCU    |   | X | 1 | 21    |
| candidate_miRNA_0197 | UAUAUAGUCCUUAUGCUUCCA    | X |   | 1 | 52    |
| candidate_miRNA_0206 | AUGGCGUGCGAGAUUAAGGAUG   | X |   | 1 | 37    |
| candidate_miRNA_0212 | AUGUCUCAAUGAACUGAUUGCCU  | X |   | 1 | 185   |
| candidate_miRNA_0227 | AUUGUUAUACUUAAGUCCUG     |   | X | 1 | 44    |
| candidate_miRNA_0241 | CACCUUGAUCGAGUCGCUUUACG  | X |   | 1 | 66    |
| candidate_miRNA_0246 | CAGACGAAACCUCAGGCAGCC    |   | X | 1 | 561   |
| candidate_miRNA_0247 | CAGACGAAACCUCAGGCAGCCG   |   | X | 1 | 2,990 |
| candidate_miRNA_0253 | CAUAACCGGGUCCAUGUACUG    | X |   | 1 | 21    |
| candidate_miRNA_0254 | CAUCAAAUAAUUGGAACAAACC   |   | X | 1 | 5,732 |
| candidate_miRNA_0256 | CAUCGGAAGUUUCGGCUGCAGA   | X |   | 1 | 31    |
| candidate_miRNA_0258 | CCAUUAUUGUCAUUAACUUAAG   |   | X | 1 | 30    |
| candidate_miRNA_0259 | CCCUUUGUAUAGAGCUUCGUA    | X |   | 1 | 26    |
| candidate_miRNA_0261 | CCGAGACGAUGAGCCGAACC     | X |   | 1 | 2,865 |
| candidate_miRNA_0264 | CGAAGGGAUCGAAGGGAUCA     | X |   | 1 | 23    |
| candidate_miRNA_0265 | CGAGAAUUGCUGAAGAACUAUG   |   | X | 1 | 29    |
| candidate_miRNA_0267 | CGAGGCUGACAUGAUGGAUACC   | X |   | 1 | 79    |
| candidate_miRNA_0271 | CGGAGGUGUGAGGCGUCACAC    |   | X | 1 | 180   |
| candidate_miRNA_0272 | CGGAGGUGUGAGGCGUCACACA   |   | X | 1 | 2,542 |
| candidate_miRNA_0273 | CGGAGGUGUGAGGCGUCACAGG   | X |   | 1 | 1,139 |
| candidate_miRNA_0275 | CGGGAUGAAUCAAUGAAUACAUG  | X |   | 1 | 162   |
| candidate_miRNA_0276 | CGGGAUUAGAACAAGGGAUUUU   | X |   | 1 | 66    |
| candidate_miRNA_0285 | CUAUAUCAUCUUUUGAGGAUC    | X |   | 1 | 47    |
| candidate_miRNA_0302 | CUGCCUAGUCGGCUGUAUUUCA   |   | X | 1 | 24    |
| candidate_miRNA_0303 | CUGGAGGCAGCGGCUACCUAAGG  | X |   | 1 | 24    |
| candidate_miRNA_0318 | CUUUAUGAAUGAUGAUUAUUACU  | X |   | 1 | 30    |
| candidate_miRNA_0324 | GAAAUCGAUAAAUCCUAUGGCA   | X |   | 1 | 24    |
| candidate_miRNA_0328 | GAGGCUGUAGGUUCGAGCCCUAC  | X |   | 1 | 7,752 |
| candidate_miRNA_0329 | GAGGUUGGGUUGGGUUGGGC     | X |   | 1 | 45    |
| candidate_miRNA_0331 | GCACUCCACGUGAUCUAGACA    |   | X | 1 | 29    |
| candidate_miRNA_0337 | GGAGGUUCGUGUUCGAUUCAC    | X |   | 1 | 2,179 |

Table S4 Continued

|                      |                          |   |   |   |   |       |
|----------------------|--------------------------|---|---|---|---|-------|
| candidate_miRNA_0339 | GGGGCUGAACUCAGUGGUAGAG   |   |   | X | 1 | 5,256 |
| candidate_miRNA_0342 | GGUUCGAUCCAGUAGUGGGC     | X |   |   | 1 | 78    |
| candidate_miRNA_0346 | GUAAGAUUUAUUUGACCCU      |   |   | X | 1 | 54    |
| candidate_miRNA_0347 | GUAAGGCCUGUAAAAUUGUAC    |   |   | X | 1 | 21    |
| candidate_miRNA_0348 | GUAAGGCCUGUAAAAUUGUACU   |   |   | X | 1 | 625   |
| candidate_miRNA_0349 | GUAAGUUAUGCGGACUGUGCU    | X |   |   | 1 | 30    |
| candidate_miRNA_0358 | GUACGUUUCUGGACCCCGCC     | X |   |   | 1 | 38    |
| candidate_miRNA_0360 | GUAGGAAUCCCGUAGUUAUUUC   | X |   |   | 1 | 53    |
| candidate_miRNA_0370 | GUCAAGUUGAAGCAUGAGAACU   |   | X |   | 1 | 51    |
| candidate_miRNA_0381 | GUGAGUCGGAUUCAGCAAGCA    |   |   | X | 1 | 171   |
| candidate_miRNA_0382 | GUGAGUCGGAUUCAGCAAGCAG   |   |   | X | 1 | 163   |
| candidate_miRNA_0383 | GUGAGUGAUGCGAUCCGCUUG    |   |   | X | 1 | 65    |
| candidate_miRNA_0386 | GUGGCACUUUCGAAGCUUUGGC   | X |   |   | 1 | 60    |
| candidate_miRNA_0389 | GUGUAACGAUACUGUACUGGAGG  | X |   |   | 1 | 38    |
| candidate_miRNA_0411 | UAAACUAUGAAACUAUUCUGAC   |   |   | X | 1 | 1,168 |
| candidate_miRNA_0414 | UAAAGGUUUCUCUGGAUCAAACC  |   | X |   | 1 | 28    |
| candidate_miRNA_0420 | UAAUGAUUGACCUUGAGCACG    |   | X |   | 1 | 215   |
| candidate_miRNA_0422 | UAAAUUAACGUCUACACUGAG    | X |   |   | 1 | 52    |
| candidate_miRNA_0424 | UAACCAUGGCAUAGAGCUCACA   | X |   |   | 1 | 195   |
| candidate_miRNA_0426 | UAACGUUGCCGUCAUAUCUUC    |   |   | X | 1 | 213   |
| candidate_miRNA_0427 | UAACUAAGCGUCAAGCAGGGAC   |   |   | X | 1 | 73    |
| candidate_miRNA_0428 | UAACUAGGCGUCAAGCAGGAACU  |   | X |   | 1 | 137   |
| candidate_miRNA_0433 | UAAGAUGAUGAUUGACUAAAGU   |   | X |   | 1 | 22    |
| candidate_miRNA_0436 | UAAGCCUCACUGCACUGUGCAUG  | X |   |   | 1 | 52    |
| candidate_miRNA_0437 | UAAGCGUGACAAAACGGCUCC    | X |   |   | 1 | 39    |
| candidate_miRNA_0443 | UAAGGCAGACUCUCCAUA AAC   | X |   |   | 1 | 33    |
| candidate_miRNA_0451 | UAAGUCAGAUUCUGGUACUAA    |   |   | X | 1 | 72    |
| candidate_miRNA_0452 | UAAGUCGAGUUCU AUGCCAACCC |   | X |   | 1 | 23    |
| candidate_miRNA_0456 | UAAUACAAGUAAAUCGAACUGC   |   |   | X | 1 | 33    |
| candidate_miRNA_0459 | UAAUAGUCGGCUACUUGGAAGG   |   |   | X | 1 | 45    |
| candidate_miRNA_0462 | UAAUCACAGGAAAACUCUCUAC   |   |   | X | 1 | 224   |
| candidate_miRNA_0465 | UAAUCGUAGGGUACUCGUGGCUG  | X |   |   | 1 | 25    |
| candidate_miRNA_0466 | UAAUCUUGGACGGAUUUGGAAG   |   | X |   | 1 | 20    |
| candidate_miRNA_0471 | UAAUGGCAAACAGGACUUAAGC   | X |   |   | 1 | 29    |
| candidate_miRNA_0475 | UAAUGUUAAAAGGAAUGACC     |   | X |   | 1 | 116   |
| candidate_miRNA_0479 | UAAUUUUUGUGGUUCUGACGAA   |   | X |   | 1 | 28    |
| candidate_miRNA_0481 | UACAAUUCGUAAACUAAUAGUAGA |   |   | X | 1 | 7,144 |
| candidate_miRNA_0488 | UACAUGAUUGCCUUCGCAGG     | X |   |   | 1 | 914   |
| candidate_miRNA_0489 | UACAUGGAAUAAAAGUUCUG     | X |   |   | 1 | 44    |
| candidate_miRNA_0490 | UACAUUUUCCCCGGACUCCAAC   |   | X |   | 1 | 20    |
| candidate_miRNA_0501 | UACCCCGCAGUCUGAAUCUAUG   |   |   | X | 1 | 56    |
| candidate_miRNA_0502 | UACCCCUUUGGUGUUGUCUGAAG  | X |   |   | 1 | 42    |
| candidate_miRNA_0503 | UACCGAGUCGACUAGUACUGA    |   | X |   | 1 | 20    |

Table S4 Continued

|                      |                          |   |   |   |   |         |
|----------------------|--------------------------|---|---|---|---|---------|
| candidate_miRNA_0517 | UACCUCGAGAGCCUAGAGCAC    |   |   | X | 1 | 584     |
| candidate_miRNA_0519 | UACGAAGGUCUAUAUAAUCAAG   |   |   | X | 1 | 799     |
| candidate_miRNA_0520 | UACGAAGGUCUAUAUAAUCAUG   | X |   |   | 1 | 36      |
| candidate_miRNA_0524 | UACGAGACUAAAUGAAUGUUUA   |   |   | X | 1 | 11,210  |
| candidate_miRNA_0525 | UACGAGAGUAUCUGUAAGGCGG   |   |   | X | 1 | 116     |
| candidate_miRNA_0527 | UACGAGGAGAUUGUCUAGUACU   |   | X |   | 1 | 162     |
| candidate_miRNA_0528 | UACGAGGAGAUUGUCUAGUACUU  |   |   | X | 1 | 51      |
| candidate_miRNA_0531 | UACGGCUUCGACUUCGAUCAAC   |   | X |   | 1 | 25      |
| candidate_miRNA_0535 | UACUAAAUGAUUGAUCUUGAGC   | X |   |   | 1 | 110,269 |
| candidate_miRNA_0536 | UACUAGAUAAGUAGAAUGUAGA   |   | X |   | 1 | 30      |
| candidate_miRNA_0541 | UACUGAUACUCAGGACCAUUAAC  | X |   |   | 1 | 93      |
| candidate_miRNA_0542 | UACUGUACUGGAGGCGGCGGC    | X |   |   | 1 | 14,104  |
| candidate_miRNA_0544 | UACUUAGAAGUCUUGCGCGCUA   |   |   | X | 1 | 33      |
| candidate_miRNA_0548 | UACUUGGUCGUCUUGGAUACAC   |   | X |   | 1 | 48      |
| candidate_miRNA_0549 | UACUUUAAUUGUUGUACUAGAG   |   | X |   | 1 | 20      |
| candidate_miRNA_0552 | UAGAAUCUGAAACUUGAAGCUU   |   | X |   | 1 | 24      |
| candidate_miRNA_0555 | UAGACCUUCGUGUUCUGGCUCU   |   | X |   | 1 | 394     |
| candidate_miRNA_0556 | UAGACGGCAAACCUUCGUAACAAG | X |   |   | 1 | 41      |
| candidate_miRNA_0557 | UAGACGGCAAACCUUCGUAACACA | X |   |   | 1 | 24      |
| candidate_miRNA_0560 | UAGAGAAGAUUGUCACAAAGGAG  |   | X |   | 1 | 22      |
| candidate_miRNA_0565 | UAGAUCACGUAGAAGUGCUC     | X |   |   | 1 | 148     |
| candidate_miRNA_0567 | UAGAUCAUGUGGAAGUGCUC     |   |   | X | 1 | 20,852  |
| candidate_miRNA_0569 | UAGAUUAUAUAGACCUUCGUGC   | X |   |   | 1 | 33      |
| candidate_miRNA_0571 | UAGCACGGAUGUCAAAUUACAA   |   |   | X | 1 | 22      |
| candidate_miRNA_0572 | UAGCACGGAUGUCAAAUUACAAU  |   | X |   | 1 | 217     |
| candidate_miRNA_0578 | UAGCGGAGUGGUUAGAUAGAACG  | X |   |   | 1 | 988     |
| candidate_miRNA_0580 | UAGGAAGGAAUCUCUGGAUUCU   | X |   |   | 1 | 27      |
| candidate_miRNA_0584 | UAGGACUAGUGCCUGUGCAUG    |   |   | X | 1 | 59      |
| candidate_miRNA_0585 | UAGGACUAGUGCCUUGUGCACG   | X |   |   | 1 | 48      |
| candidate_miRNA_0586 | UAGGACUCAGGAUGGGCUAGGA   | X |   |   | 1 | 101     |
| candidate_miRNA_0589 | UAGGAUAAUUGUUCUGGGACAAU  |   | X |   | 1 | 28      |
| candidate_miRNA_0592 | UAGGCACGAAGGACUAUAUAA    | X |   |   | 1 | 52      |
| candidate_miRNA_0594 | UAGGCAUGUCGAAGGAUUUUUC   | X |   |   | 1 | 27      |
| candidate_miRNA_0599 | UAGGGCAGACACCUCCGUAGG    |   |   | X | 1 | 370     |
| candidate_miRNA_0601 | UAGGGUGGACAUCUGAAGGAUAG  | X |   |   | 1 | 23      |
| candidate_miRNA_0603 | UAGGUAGAAAAGAAAAGGAUCU   |   | X |   | 1 | 21      |
| candidate_miRNA_0606 | UAGGUCACGUGGAAGUGCUCUA   |   |   | X | 1 | 309     |
| candidate_miRNA_0607 | UAGGUGAUCACUGGUGAUCAUG   | X |   |   | 1 | 148     |
| candidate_miRNA_0608 | UAGGUGAUAUUGGUGAUCAUG    | X |   |   | 1 | 340     |
| candidate_miRNA_0611 | UAGUACGCAUAGCUUGAACACC   | X |   |   | 1 | 22      |
| candidate_miRNA_0612 | UAGUACCAGAAUCUGACUUAGA   |   |   | X | 1 | 404     |
| candidate_miRNA_0617 | UAGUAUAGCUGAGAAUCUGAGA   | X |   |   | 1 | 44      |
| candidate_miRNA_0621 | UAGUGGGAAGCUGAUAGGGCAA   |   | X |   | 1 | 123     |



Table S4 Continued

|                      |                           |   |   |   |   |        |
|----------------------|---------------------------|---|---|---|---|--------|
| candidate_miRNA_0622 | UAGUUACGAAGAUUAUUAUAGC    | X |   |   | 1 | 540    |
| candidate_miRNA_0624 | UAGUUCGAUAGUCCUGUGGUGA    |   | X |   | 1 | 20     |
| candidate_miRNA_0627 | UAGUUGUAGGUUAAGGCUUUA     | X |   |   | 1 | 53     |
| candidate_miRNA_0628 | UAGUUUAUAACUAGGCGUCAAGC   |   |   | X | 1 | 2,613  |
| candidate_miRNA_0634 | UAUACUAAAUGAUUGAUCUUGAA   |   | X |   | 1 | 36     |
| candidate_miRNA_0635 | UAUACUUUCUGGCAGCACGAG     |   |   | X | 1 | 38     |
| candidate_miRNA_0639 | UAUAUAAUAGUGUGACGGAAACC   |   | X |   | 1 | 25     |
| candidate_miRNA_0640 | UAUAUCGCUCACAUCAUGCUG     |   | X |   | 1 | 63     |
| candidate_miRNA_0644 | UAUCACUGGUUUUACUUGAAAG    | X |   |   | 1 | 326    |
| candidate_miRNA_0646 | UAUCAUUGGUUUUACUUGGAAG    |   | X |   | 1 | 47     |
| candidate_miRNA_0652 | UAUGACACUUUCAAGAAUUGGAUG  | X |   |   | 1 | 2,655  |
| candidate_miRNA_0664 | UAUGGCUAGUCAGGACCGCUGC    | X |   |   | 1 | 290    |
| candidate_miRNA_0668 | UAUGUACUCUGUAUGUAUGUACC   | X |   |   | 1 | 48     |
| candidate_miRNA_0671 | UAUGUAUGUAUGGAUGGAUG      |   |   | X | 1 | 31     |
| candidate_miRNA_0673 | UAUGUUGGAGAUGUUUGGAAGA    |   | X |   | 1 | 37     |
| candidate_miRNA_0674 | UAUUAAAAUGGUCUCACAACU     |   | X |   | 1 | 26     |
| candidate_miRNA_0679 | UAUUGGAGGAACUUUUUGAGCU    |   | X |   | 1 | 78     |
| candidate_miRNA_0683 | UCAACAUAUAGAAGAUUGAGGC    | X |   |   | 1 | 23     |
| candidate_miRNA_0684 | UCAAACUCUUGCACUGGUAUCC    | X |   |   | 1 | 259    |
| candidate_miRNA_0688 | UCAACAUCAGAUCCAAGACGCUU   |   |   | X | 1 | 26     |
| candidate_miRNA_0695 | UCAAGCAGGGACUUAAGUAAUAAAC |   |   | X | 1 | 42     |
| candidate_miRNA_0696 | UCAAGCAUUGUUCGUUCAGUAGC   | X |   |   | 1 | 23     |
| candidate_miRNA_0698 | UCAAGUAGAAUUAUAGAUAAAC    |   |   | X | 1 | 252    |
| candidate_miRNA_0699 | UCAAGUAGAAUUAUAGAUAAACU   |   | X |   | 1 | 25,941 |
| candidate_miRNA_0700 | UCAAGUAGAAUGUAAAUAACU     |   | X |   | 1 | 160    |
| candidate_miRNA_0703 | UCAAGUAGAAUGUAGGUAGACU    |   | X |   | 1 | 97     |
| candidate_miRNA_0704 | UCAAGUAGAAUGUGGGUAAACU    |   | X |   | 1 | 172    |
| candidate_miRNA_0705 | UCAAGUAGGAUGUAGGUAAAC     |   |   | X | 1 | 2,186  |
| candidate_miRNA_0706 | UCAAGUAGGGACUUAAGUAA      | X |   |   | 1 | 1,523  |
| candidate_miRNA_0707 | UCAAUACAUAGAAUCUAAAAC     | X |   |   | 1 | 2,433  |
| candidate_miRNA_0708 | UCAAUUAUUUAGUAUACUCUACU   |   | X |   | 1 | 138    |
| candidate_miRNA_0714 | UCACCAGACAUAGAUUAGAGACU   | X |   |   | 1 | 90     |
| candidate_miRNA_0715 | UCACCAGACAUAGAUUAGAGACUG  |   |   | X | 1 | 23     |
| candidate_miRNA_0717 | UCACCAGUAAGCUAUGAUACCU    | X |   |   | 1 | 59     |
| candidate_miRNA_0723 | UCACGUGGAAGUGCUCCAGGC     | X |   |   | 1 | 45     |
| candidate_miRNA_0724 | UCACGUGGAAGUGCUCUAGAC     | X |   |   | 1 | 50     |
| candidate_miRNA_0727 | UCACUGAUCUGAUCUAUCUGAAG   |   | X |   | 1 | 27     |
| candidate_miRNA_0729 | UCACUGGUUUUUUUUUGGAAG     | X |   |   | 1 | 3,861  |
| candidate_miRNA_0730 | UCAGAAGAACUCAUAGAUUUUGA   |   |   | X | 1 | 115    |
| candidate_miRNA_0731 | UCAGAUCCGGACAAGUACUAGA    |   |   | X | 1 | 56     |
| candidate_miRNA_0732 | UCAGAUGUUUAAAGGUGAAUUC    |   | X |   | 1 | 24     |
| candidate_miRNA_0735 | UCAGGUAGAAUGUAGGUAAACU    |   | X |   | 1 | 71     |
| candidate_miRNA_0739 | UCAUCAUUGUCAUUACUUUAAG    |   |   | X | 1 | 711    |

Table S4 Continued

|                      |                           |   |  |   |   |        |       |
|----------------------|---------------------------|---|--|---|---|--------|-------|
| candidate_miRNA_0741 | UCAUCGGGUCGCCAAUAUCACC    |   |  | X | 1 | 37     |       |
| candidate_miRNA_0743 | UCAUGCCUAUGGCUAGUCAGGACC  | X |  |   | 1 | 7,979  |       |
| candidate_miRNA_0744 | UCAUGGAACUCAUUUUUGUACU    |   |  | X | 1 | 24     |       |
| candidate_miRNA_0756 | UCCACUAGAUCACUGGCUCUUG    |   |  | X | 1 | 24,827 |       |
| candidate_miRNA_0757 | UCCAGUACAGUAUCGUUACAC     |   |  |   | X | 1      | 69    |
| candidate_miRNA_0772 | UCCUACUUGAUCUAGUAACGAC    |   |  |   | X | 1      | 65    |
| candidate_miRNA_0775 | UCCUCGUCCACUAGAUCACU      |   |  | X | 1 | 1,741  |       |
| candidate_miRNA_0777 | UCCUGGAAAGCGAAUUGUCCCU    |   |  | X | 1 | 25     |       |
| candidate_miRNA_0778 | UCCUGGAGCCCUGAGGAGCCU     |   |  | X | 1 | 39     |       |
| candidate_miRNA_0779 | UCCUGGAGGCUCAUCACGUGA     |   |  | X | 1 | 21     |       |
| candidate_miRNA_0780 | UCGAAAAGUACAUUACAGGACU    |   |  | X | 1 | 24     |       |
| candidate_miRNA_0784 | UCGAAGUCGUACCUACAAGG      |   |  |   | X | 1      | 55    |
| candidate_miRNA_0785 | UCGAAGUGGUUUUAUACUAGGCG   |   |  | X | 1 | 195    |       |
| candidate_miRNA_0786 | UCGAAUCGAAUAUAAUAAUGACC   |   |  | X | 1 | 288    |       |
| candidate_miRNA_0789 | UCGAGAACUUUAAAGUAUUAU     |   |  | X | 1 | 326    |       |
| candidate_miRNA_0798 | UCGAGGAUGAUUUGAAGAAUCC    |   |  |   | X | 1      | 184   |
| candidate_miRNA_0802 | UCGAGGUGGUUUACAACUAGGCG   |   |  | X | 1 | 561    |       |
| candidate_miRNA_0804 | UCGAGGUGGUUUUAACUAGGUG    |   |  |   | X | 1      | 1,806 |
| candidate_miRNA_0805 | UCGAGUAGAUACCUAGCAAAGC    |   |  | X | 1 | 28     |       |
| candidate_miRNA_0807 | UCGAUGGGCUCCGGGUUCGAU     |   |  |   | X | 1      | 1,168 |
| candidate_miRNA_0812 | UCGCAUUCGACUGAUAGUCGUG    |   |  | X | 1 | 21     |       |
| candidate_miRNA_0817 | UCGGAAAGUGUGACUGAAGGACU   |   |  | X | 1 | 27     |       |
| candidate_miRNA_0823 | UCGGAGCUGUCGCGAUGCAGACC   |   |  | X | 1 | 26     |       |
| candidate_miRNA_0825 | UCGGAUACUCGCUUGAGGCGG     |   |  | X | 1 | 25     |       |
| candidate_miRNA_0826 | UCGGAUCAGAAACCAUAUGCGA    |   |  | X | 1 | 23     |       |
| candidate_miRNA_0829 | UCGGCCGGAUUGUGACUUAUGCC   |   |  |   | X | 1      | 257   |
| candidate_miRNA_0835 | UCGGGAAGAUAGAUAGAACGAC    |   |  | X | 1 | 28     |       |
| candidate_miRNA_0836 | UCGGUAAAGUAAGAUCAUUGAA    |   |  |   | X | 1      | 146   |
| candidate_miRNA_0838 | UCGGUCAAUUGUGAUUUUGAGG    |   |  | X | 1 | 33     |       |
| candidate_miRNA_0841 | UCGUAACUGAUAGUAGAGUAUA    |   |  |   | X | 1      | 3,010 |
| candidate_miRNA_0843 | UCGUACUUGGAUCUUCAGGAGG    |   |  | X | 1 | 24     |       |
| candidate_miRNA_0844 | UCGUAGGUCCAUAACUCUCAGG    |   |  | X | 1 | 67     |       |
| candidate_miRNA_0845 | UCGUCAAAAUCCAUAUCUCGAGU   |   |  |   | X | 1      | 55    |
| candidate_miRNA_0849 | UCUACGGAAGUGCGAAGCUCUCC   |   |  |   | X | 1      | 245   |
| candidate_miRNA_0852 | UCUCAGAUCGUUUUGUGUUAUC    |   |  | X | 1 | 86     |       |
| candidate_miRNA_0854 | UCUCCGGCUUUUAUGAAUGAUCAAC |   |  | X | 1 | 54     |       |
| candidate_miRNA_0856 | UCUGAAAUCCCCGAGAUUCGCC    |   |  | X | 1 | 30     |       |
| candidate_miRNA_0862 | UCUGGUUGGUAGUUGUAGGUUA    |   |  | X | 1 | 5,651  |       |
| candidate_miRNA_0863 | UCUUGAAUUUUCGACCGGUGC     |   |  |   | X | 1      | 29    |
| candidate_miRNA_0864 | UCUUUGAUGGUCUAGUGGUCA     |   |  |   | X | 1      | 169   |
| candidate_miRNA_0865 | UCUUUUGUAUGAAUGAGAAUACC   |   |  | X | 1 | 43     |       |
| candidate_miRNA_0866 | UGAAAAGCUUUUGCAUCUCGGA    |   |  | X | 1 | 674    |       |
| candidate_miRNA_0868 | UGAAGACUAGUGAUAAAGCC      |   |  |   | X | 1      | 3,132 |

Table S4 Continued

|                      |                         |   |   |   |   |        |
|----------------------|-------------------------|---|---|---|---|--------|
| candidate_miRNA_0869 | UGAAGAGCACCUUGAUGAGG    |   |   | X | 1 | 1,839  |
| candidate_miRNA_0870 | UGAAGGACUAUAUAAUCAAGAUG |   |   | X | 1 | 1,086  |
| candidate_miRNA_0875 | UGAAGUAGUGUACUGUGGCAUU  |   | X |   | 1 | 53     |
| candidate_miRNA_0879 | UGAAUCCACGUCGGCUAUGGCAC | X |   |   | 1 | 324    |
| candidate_miRNA_0880 | UGAAUGAAGCUUGAGCACGGAUG |   | X |   | 1 | 35     |
| candidate_miRNA_0888 | UGACCAGAACCAUGACCACGACC | X |   |   | 1 | 156    |
| candidate_miRNA_0889 | UGACCUAGGAGCCUUGAGCAUG  | X |   |   | 1 | 36     |
| candidate_miRNA_0895 | UGACUAACUUAUGGACCGGAGA  |   | X |   | 1 | 56     |
| candidate_miRNA_0898 | UGACUGACUGACUGACUGACU   |   | X |   | 1 | 112    |
| candidate_miRNA_0899 | UGAGAAAUGGUCAAAGAAAAUAG |   |   | X | 1 | 187    |
| candidate_miRNA_0901 | UGAGAAUUGCCUUUGAUGAUUG  |   | X |   | 1 | 29     |
| candidate_miRNA_0908 | UGAAGACUAGUGAUAAAGCCU   |   | X |   | 1 | 9,923  |
| candidate_miRNA_0910 | UGAGAUGUAUAGUACGAAGGUC  |   |   | X | 1 | 20     |
| candidate_miRNA_0914 | UGAGCUGGAAGCAACUGACAUGU |   | X |   | 1 | 76     |
| candidate_miRNA_0917 | UGAGGACAAUGGACCAAGAUUUC |   | X |   | 1 | 85     |
| candidate_miRNA_0920 | UGAGGAUAUAAUGAAUGACUUCU |   | X |   | 1 | 136    |
| candidate_miRNA_0929 | UGAGGUUGAUGAUCGACAAGUU  |   | X |   | 1 | 23     |
| candidate_miRNA_0931 | UGAGUCGAUUUUCUGGGGAACU  |   | X |   | 1 | 53     |
| candidate_miRNA_0935 | UGAUAACUAAGUUGAGCACCA   |   |   | X | 1 | 28     |
| candidate_miRNA_0938 | UGAUACGGUACUUUUGGGAUGC  |   | X |   | 1 | 47     |
| candidate_miRNA_0941 | UGAUAGGGCAGAACUGAGGCCUA |   |   | X | 1 | 1,592  |
| candidate_miRNA_0942 | UGAUAGGGUAGAGACGGGAACU  |   | X |   | 1 | 197    |
| candidate_miRNA_0943 | UGAUUUGAUUUGAUUUGAUUUG  | X |   |   | 1 | 26     |
| candidate_miRNA_0948 | UGAUGCGCUGCGCUGUGAGAUC  |   | X |   | 1 | 23     |
| candidate_miRNA_0949 | UGAUGGAUAGACUGGAUAGCCU  |   | X |   | 1 | 738    |
| candidate_miRNA_0953 | UGAUGUUACGUGACGGUUGUUA  |   | X |   | 1 | 51     |
| candidate_miRNA_0954 | UGAUGUUUUAUUGUUUGAUACCC |   |   | X | 1 | 30     |
| candidate_miRNA_0956 | UGAUUCCGGAGAUUUGGUUCG   |   |   | X | 1 | 95,454 |
| candidate_miRNA_0957 | UGAUUCGUGACACUCUGGGACCC |   | X |   | 1 | 82     |
| candidate_miRNA_0959 | UGAUUGAUCUUGAGCACGAAG   | X |   |   | 1 | 455    |
| candidate_miRNA_0961 | UGAUUGAUCUUGAGCAUGAAGC  |   |   | X | 1 | 6,391  |
| candidate_miRNA_0962 | UGAUUGGUAGUUGUGGGUUAAG  | X |   |   | 1 | 559    |
| candidate_miRNA_0963 | UGAUUGUAUUGUAUGAUGUAUG  |   | X |   | 1 | 64     |
| candidate_miRNA_0965 | UGAUUUGAGAACGAAUACCCU   |   | X |   | 1 | 21     |
| candidate_miRNA_0968 | UGCACACGGACAAUGAUACUCG  |   |   | X | 1 | 81     |
| candidate_miRNA_0970 | UGCACGCUCCGUACUGUACUG   | X |   |   | 1 | 37     |
| candidate_miRNA_0973 | UGCAGCACUGUAGUAUCUACCC  |   | X |   | 1 | 30     |
| candidate_miRNA_0974 | UGCAGUUGGUAAUAGGAUCUGC  |   |   | X | 1 | 21     |
| candidate_miRNA_0976 | UGCAUCUCUCACAAGCGCGGACC | X |   |   | 1 | 179    |
| candidate_miRNA_0979 | UGCCAUUCUCGGAUCAUCGGUA  | X |   |   | 1 | 2,726  |
| candidate_miRNA_0983 | UGCCCUGAAAGACUCUCUCGAG  |   | X |   | 1 | 23     |
| candidate_miRNA_0985 | UGCCUAAGGUUCGUCGGUUGG   |   |   | X | 1 | 450    |
| candidate_miRNA_0986 | UGCCUAAGGUUCGUCUGGUUGA  |   | X |   | 1 | 514    |

Table S4 Continued

|                      |                         |   |   |   |   |       |
|----------------------|-------------------------|---|---|---|---|-------|
| candidate_miRNA_0995 | UGCGGAACAAUGAAUAAUUAGU  |   | X |   | 1 | 21    |
| candidate_miRNA_0999 | UGCGGUGAUGACUCAAUUCGA   |   |   | X | 1 | 198   |
| candidate_miRNA_1000 | UGCGUAGCACGUGCACAAGGCAC |   |   | X | 1 | 80    |
| candidate_miRNA_1003 | UGCUCACGGUAGGCUCAGUUCU  |   | X |   | 1 | 31    |
| candidate_miRNA_1005 | UGCUCUAGGCUCUCGAAGUAGG  | X |   |   | 1 | 1,132 |
| candidate_miRNA_1006 | UGCUCUAGGCUCUCGAGGUAG   | X |   |   | 1 | 41    |
| candidate_miRNA_1007 | UGCUGGAUCACUCAGGAUCACU  |   | X |   | 1 | 182   |
| candidate_miRNA_1025 | UGGCUGUCCAGGACCGCGCAGC  | X |   |   | 1 | 742   |
| candidate_miRNA_1026 | UGGCUGUUAGACGAGAAAUGAAA |   | X |   | 1 | 23    |
| candidate_miRNA_1028 | UGGCUUUGAUCAAGUGAAGGUC  |   | X |   | 1 | 28    |
| candidate_miRNA_1031 | UGGGCCAUAUAUAUUACUGACC  | X |   |   | 1 | 40    |
| candidate_miRNA_1033 | UGGGGAACUCGGACACUUUUUG  | X |   |   | 1 | 75    |
| candidate_miRNA_1034 | UGGGGAUAGAUGGACGGAGUGC  | X |   |   | 1 | 32    |
| candidate_miRNA_1035 | UGGGGAUAGCUACUCUAUAUAC  |   |   | X | 1 | 24    |
| candidate_miRNA_1042 | UGGUAGUUGUGGUUAAGGCUUU  |   |   | X | 1 | 23    |
| candidate_miRNA_1043 | UGGUUAUAUGACUACUUGGUUG  | X |   |   | 1 | 73    |
| candidate_miRNA_1048 | UGUAAGGAAUAGAGCAGUAAGCU |   | X |   | 1 | 29    |
| candidate_miRNA_1050 | UGUACCCUAUUGUAGACCGUA   | X |   |   | 1 | 697   |
| candidate_miRNA_1055 | UGUAUUUAAAAAGUCAGGGUA   | X |   |   | 1 | 75    |
| candidate_miRNA_1056 | UGUCAGCAACUGUUGGGACGGCU |   | X |   | 1 | 30    |
| candidate_miRNA_1059 | UGUCCUUCUCUCAUGGCAUG    | X |   |   | 1 | 27    |
| candidate_miRNA_1063 | UGUGACUGCAAUUUCGGCUCC   |   | X |   | 1 | 42    |
| candidate_miRNA_1072 | UGUGGAAGUGCUCUAGGCUC    |   |   | X | 1 | 6,586 |
| candidate_miRNA_1073 | UGUGGAAUUCGGAUUUGGUAUG  |   | X |   | 1 | 20    |
| candidate_miRNA_1078 | UGUGUACUUGAGGAUUAUGCCCA |   |   | X | 1 | 110   |
| candidate_miRNA_1080 | UGUGUAGGCAUAUUAUCUCC    | X |   |   | 1 | 491   |
| candidate_miRNA_1081 | UGUGUAGGCAUAUUAUCUCCU   |   | X |   | 1 | 1,548 |
| candidate_miRNA_1084 | UGUGUGGUCGAGUUUGUCAACA  | X |   |   | 1 | 23    |
| candidate_miRNA_1085 | UGUUACGUGACGGUUGUUACCC  |   |   | X | 1 | 26    |
| candidate_miRNA_1086 | UGUUCUGAUUAGAAGUCGCGGCC | X |   |   | 1 | 131   |
| candidate_miRNA_1088 | UGUUGGCACACUCUCCAGAGC   | X |   |   | 1 | 33    |
| candidate_miRNA_1091 | UGUUUUUCUGAAUUGCCUUGG   | X |   |   | 1 | 142   |
| candidate_miRNA_1096 | UUAACUAGGAAUCGUCGUCC    | X |   |   | 1 | 184   |
| candidate_miRNA_1097 | UUAACUAGAAUCUACAGGUA    |   | X |   | 1 | 2,011 |
| candidate_miRNA_1098 | UUAAGGAUUUGGUAGCAUCACC  |   | X |   | 1 | 22    |
| candidate_miRNA_1101 | UUAACUAGAACCUUGAGCAUG   |   | X |   | 1 | 81    |
| candidate_miRNA_1103 | UUAUUUGUUGGUGUGAUCUGU   | X |   |   | 1 | 64    |
| candidate_miRNA_1104 | UUAUUUGUUGGUGUGAUCUGUU  |   | X |   | 1 | 318   |
| candidate_miRNA_1107 | UUACGAGAACUGAUCAUACGAGA | X |   |   | 1 | 26    |
| candidate_miRNA_1108 | UUACGAGAUACGAUUUGACCG   |   | X |   | 1 | 146   |
| candidate_miRNA_1110 | UUACGAGGUUUGCUGUCUAGA   | X |   |   | 1 | 64    |
| candidate_miRNA_1116 | UUAGAGCAUACAUGUCAUCAUG  | X |   |   | 1 | 112   |
| candidate_miRNA_1117 | UUAGAUACUCGUAAUUGAAUGA  |   | X |   | 1 | 23    |

Table S4 Continued

|                      |                           |   |   |   |   |   |       |
|----------------------|---------------------------|---|---|---|---|---|-------|
| candidate_miRNA_1119 | UUAGCAUGAAGGUCUAUAUAACC   |   | X |   |   | 1 | 74    |
| candidate_miRNA_1127 | UUUAUACUAGACGUCAAGCAGA    |   |   | X |   | 1 | 596   |
| candidate_miRNA_1129 | UUUAUAAUAUAGUUCGUAAGUCU   |   |   | X |   | 1 | 93    |
| candidate_miRNA_1132 | UUUAUAGCAGACUUGGAUUUAAU   | X |   |   |   | 1 | 20    |
| candidate_miRNA_1134 | UUUAUAGACCUUCGUACUAUA     |   |   | X |   | 1 | 22    |
| candidate_miRNA_1140 | UUUAUGUAGGACUUGGUAGGUUAUA |   |   |   | X | 1 | 247   |
| candidate_miRNA_1144 | UUUAUAAAAGAUUGGGUGGAAG    |   |   |   | X | 1 | 21    |
| candidate_miRNA_1147 | UUCAAAACCGAAAUCUGGCGCCU   |   |   |   | X | 1 | 63    |
| candidate_miRNA_1151 | UUCAAUUCUGGGUUCGAUUCUU    |   | X |   |   | 1 | 501   |
| candidate_miRNA_1155 | UUCACUUUACUCUUGAUCCUUG    |   | X |   |   | 1 | 99    |
| candidate_miRNA_1157 | UUCAGAGACUCAGAGUAUACUG    |   |   |   | X | 1 | 73    |
| candidate_miRNA_1161 | UUCAUAGGUGUAGCUGGCCAUG    |   |   | X |   | 1 | 45    |
| candidate_miRNA_1163 | UUCAUCGUAGGCAGUCUGGUGC    |   |   |   | X | 1 | 62    |
| candidate_miRNA_1166 | UCCAAUGGAUCACAUGAACUG     |   |   | X |   | 1 | 29    |
| candidate_miRNA_1167 | UCCAAUUGUUCUUCUGAAA       |   |   |   | X | 1 | 101   |
| candidate_miRNA_1170 | UCCAGGCAGGACAUUUGAACC     |   |   |   | X | 1 | 26    |
| candidate_miRNA_1172 | UCCCGAUUCCUCUGUUCUUG      |   | X |   |   | 1 | 41    |
| candidate_miRNA_1173 | UCCCGAUUCCUCUGUUCUUG      | X |   |   |   | 1 | 64    |
| candidate_miRNA_1176 | UCCGGAAGUCGAUCGACUCU      |   | X |   |   | 1 | 24    |
| candidate_miRNA_1177 | UCCGGAAGUCGAUCGACUCUU     | X |   |   |   | 1 | 112   |
| candidate_miRNA_1180 | UCCUCAUAUUCACUCUGGUC      |   | X |   |   | 1 | 27    |
| candidate_miRNA_1186 | UUCGAUCGUCAUUUUUCUGCUU    |   |   | X |   | 1 | 58    |
| candidate_miRNA_1190 | UUCGGAGGAGAAAUUUGAUGU     |   |   | X |   | 1 | 138   |
| candidate_miRNA_1192 | UUCGGCCGGAUUGUGACUUAUGC   |   |   |   | X | 1 | 30    |
| candidate_miRNA_1196 | UUCGGUCUCGCUCUUUGCUCU     |   |   | X |   | 1 | 34    |
| candidate_miRNA_1204 | UUCUAAGUGAUUGAAUUGAC      |   | X |   |   | 1 | 177   |
| candidate_miRNA_1206 | UUCUAUUUGAUUCUAGUAACGAC   |   |   |   | X | 1 | 93    |
| candidate_miRNA_1211 | UUCUGUUAGCAACUCUGCACC     |   | X |   |   | 1 | 80    |
| candidate_miRNA_1213 | UUCUUCGUGUACUACCUAUC      |   | X |   |   | 1 | 2,403 |
| candidate_miRNA_1214 | UUGAAAGGAAUCAUCGGAUUGA    |   |   | X |   | 1 | 22    |
| candidate_miRNA_1221 | UUGAGAACUCGUCAGCUGAUC     |   | X |   |   | 1 | 178   |
| candidate_miRNA_1229 | UUGAGUCAAUUCUGUCGUCCACA   |   | X |   |   | 1 | 20    |
| candidate_miRNA_1231 | UUGAUUAUAUAGACCUUCGUA     |   | X |   |   | 1 | 106   |
| candidate_miRNA_1232 | UUGAUUAUAUAGACCUUCGUAC    |   |   | X |   | 1 | 37    |
| candidate_miRNA_1233 | UUGAUUAUAUAGACCUUCGUGU    |   | X |   |   | 1 | 226   |
| candidate_miRNA_1234 | UUGAUUAUAUAGACCUUUGUG     |   | X |   |   | 1 | 57    |
| candidate_miRNA_1235 | UUGAUUAUAUAGUCCUUCAUG     |   |   |   | X | 1 | 1,805 |
| candidate_miRNA_1236 | UUGAUUAUAUAGUCCUUCGUGC    |   | X |   |   | 1 | 355   |
| candidate_miRNA_1240 | UUGCAAGGAAUGAACCUAUCCU    |   |   | X |   | 1 | 58    |
| candidate_miRNA_1246 | UUGCAUGAGAUUGAUUCCAGAC    |   |   |   | X | 1 | 64    |
| candidate_miRNA_1247 | UUGCAUGAGAUUGAUUCCAGACU   | X |   |   |   | 1 | 89    |
| candidate_miRNA_1254 | UUGCGCGACGGUAAAUCUUAAG    |   |   |   | X | 1 | 45    |
| candidate_miRNA_1255 | UUGCGCGACGGUAAAUCUUAAGU   |   |   |   | X | 1 | 30    |

Table S4 Continued

|                      |                          |   |   |   |   |       |    |
|----------------------|--------------------------|---|---|---|---|-------|----|
| candidate_miRNA_1265 | UUGGACUAGAUUUGAUUACAC    |   |   | X | 1 | 26    |    |
| candidate_miRNA_1268 | UUGGAUAGCCUGGAUAGACUGG   |   |   | X | 1 | 1,283 |    |
| candidate_miRNA_1271 | UUGGCAGAGAAUUCUUGAAAGG   |   | X |   | 1 | 25    |    |
| candidate_miRNA_1272 | UUGGCAGCUGAAGACUUGACACC  |   |   | X | 1 | 27    |    |
| candidate_miRNA_1283 | UUGGGCUGGUAGGCCUUUUGGGGU |   |   |   | X | 1     | 42 |
| candidate_miRNA_1287 | UUGGGGCGGAGGGACAGAAUUC   |   | X |   | 1 | 21    |    |
| candidate_miRNA_1291 | UUGGGUUGUGGGCAGUGGGCA    | X |   |   | 1 | 70    |    |
| candidate_miRNA_1293 | UUGGUAGUAGAUUCAGUUGCAUG  | X |   |   | 1 | 87    |    |
| candidate_miRNA_1298 | UUGGUUAUAUAGAUUUCUUGCU   |   | X |   | 1 | 22    |    |
| candidate_miRNA_1299 | UUGGUUGGAUGACAGCAAUGCAG  | X |   |   | 1 | 63    |    |
| candidate_miRNA_1301 | UUGGUUCCUCGUCUCGGACGC    |   |   | X | 1 | 20    |    |
| candidate_miRNA_1302 | UUGUACGAUACUGUACUGGAGG   | X |   |   | 1 | 1,306 |    |
| candidate_miRNA_1313 | UUGUAUCAUAGAAAGUUUGACCU  |   | X |   | 1 | 30    |    |
| candidate_miRNA_1314 | UUGUAUUUAAACUCAGAAUCUACA | X |   |   | 1 | 57    |    |
| candidate_miRNA_1317 | UUGUCACACUCAAGAAUACUGG   |   |   | X | 1 | 61    |    |
| candidate_miRNA_1318 | UUGUCAGAAUAUCUAGGACUUC   |   | X |   | 1 | 53    |    |
| candidate_miRNA_1321 | UUGUCGUCUGGUCGUCAUGGCGCC |   |   | X | 1 | 33    |    |
| candidate_miRNA_1323 | UUGUCUGAUUGUAUUGCCUUGC   |   |   | X | 1 | 35    |    |
| candidate_miRNA_1339 | UUUCAUUUCUAGAGCCUGUCU    |   | X |   | 1 | 28    |    |
| candidate_miRNA_1340 | UUUCAUUUCUAGAGCCUGUCUA   |   |   | X | 1 | 23    |    |
| candidate_miRNA_1343 | UUUCCGCCGCUUCGAGUACUG    | X |   |   | 1 | 103   |    |
| candidate_miRNA_1345 | UUUCCUACUUCAGAUUUCUGC    |   |   | X | 1 | 43    |    |
| candidate_miRNA_1347 | UUUCCUAUUCGGUCUAGCUGUG   |   |   | X | 1 | 22    |    |
| candidate_miRNA_1352 | UUUCGGGUUGAGCCAUACAUC    |   |   | X | 1 | 44    |    |
| candidate_miRNA_1355 | UUUCUCUCAGGUCUUGAGCAUG   |   | X |   | 1 | 23    |    |
| candidate_miRNA_1357 | UUUCUGGGAACUAUCAAGAGCU   |   | X |   | 1 | 34    |    |
| candidate_miRNA_1359 | UUUCUUGACUGUAUUUCCCCGG   |   |   | X | 1 | 73    |    |
| candidate_miRNA_1368 | UUUGGACAAAUGACGCUCAGA    | X |   |   | 1 | 505   |    |
| candidate_miRNA_1372 | UUUGGCGGAGUGGUUAACGC     |   |   | X | 1 | 9,412 |    |
| candidate_miRNA_1374 | UUUGUAGAGCUUCGUGCUCAGA   | X |   |   | 1 | 45    |    |
| candidate_miRNA_1376 | UUUUGAGGACCUUUGGGACCCU   |   | X |   | 1 | 655   |    |
| candidate_miRNA_1377 | UUUUGGACUAGAUUUGAUUAUCA  |   |   | X | 1 | 43    |    |
| candidate_miRNA_1380 | UUUUUCUUCUCCAAGGGCUU     |   | X |   | 1 | 31    |    |

**Table S5.** Targets predicted for *Sclerotinia sclerotiorum* small RNAs by degradome sequencing

| Locus                | Sequence                 | Length | Small RNA |       | Direction Change | Predicted Target | Degradome Reads | Degradome P value | Degradome Category | Log2 Fold Change |                                                                   | Annotation |
|----------------------|--------------------------|--------|-----------|-------|------------------|------------------|-----------------|-------------------|--------------------|------------------|-------------------------------------------------------------------|------------|
|                      |                          |        | Reads     | smRNA |                  |                  |                 |                   |                    | Change           | Target                                                            |            |
| candidate_miRNA_0959 | UGAUUGAUCUUGAGCACGAAG    | 21     | 85,819    | NS    | NS               | SS1G_09852       | 83              | 2.80E-02          | 0                  | NS               | Hypothetical protein                                              |            |
| candidate_miRNA_0075 | UCGAGGUGGUUUUAUACUAGACG  | 23     | 30,174    | 1.48  | down             | SS1G_13086       | 773             | 6.76E-04          | 0                  | NS               | Hypothetical protein                                              |            |
| candidate_miRNA_0908 | UGAAGACUAGUGAUAAAGCCU    | 21     | 9,923     | NS    | NS               | SS1G_04502       | 86              | 1.07E-02          | 0                  | NS               | Ammonium transporter-like protein                                 |            |
| candidate_miRNA_1235 | UUGAUUUAUAGUCCUUCUAG     | 21     | 1,805     | 1.14  | down             | SS1G_13405       | 107             | 6.75E-04          | 0                  | NS               | Hypothetical protein                                              |            |
| candidate_miRNA_1231 | UUGAUUUAUAGACCUUCGUA     | 21     | 106       | NS    | NS               | SS1G_13405       | 107             | 6.76E-04          | 0                  | NS               | Hypothetical protein                                              |            |
| candidate_miRNA_1268 | UUGGAUAGCCUGGAUAGACUGG   | 22     | 1,283     | 1.84  | down             | SS1G_01281       | 37              | 1.21E-02          | 0                  | NS               | Hypothetical protein                                              |            |
| candidate_miRNA_1376 | UUUUGAGGACCUUUGGGACCCU   | 22     | 655       | NS    | NS               | SS1G_10378       | 188             | 3.84E-02          | 0                  | NS               | Hypothetical protein                                              |            |
| candidate_miRNA_0037 | CGGAGGUGUGAGGCGUCACAG    | 21     | 157       | NS    | NS               | SS1G_12523       | 123             | 4.72E-03          | 0                  | NS               | Acid--D-amino-acid ligases (peptide synthases).                   |            |
| candidate_miRNA_0051 | UAGACGGCAAACUCGUAAACAAA  | 23     | 97        | 1.26  | down             | SS1G_13438       | 654             | 6.76E-04          | 0                  | NS               | Hypothetical protein                                              |            |
| candidate_miRNA_0854 | UCUCCGGCUUUUUGAAUGAUCAAC | 24     | 54        | 1.88  | down             | SS1G_00360       | 187             | 6.06E-03          | 0                  | NS               | Hypothetical protein                                              |            |
| candidate_miRNA_0197 | UAUUAUGUCCUUAUGCUUCA     | 22     | 52        | 1.05  | down             | SS1G_10028       | 29              | 2.40E-02          | 0                  | NS               | Hypothetical protein                                              |            |
| candidate_miRNA_0370 | GUCAAAGUUGAAGCAUGAGAACU  | 23     | 51        | NS    | NS               | SS1G_11403       | 65              | 1.01E-02          | 0                  | NS               | Hypothetical protein                                              |            |
| candidate_miRNA_0129 | UAGCCUAGGAAUCUGUUUCUG    | 22     | 43        | 2.06  | up               | SS1G_08758       | 134             | 3.39E-02          | 0                  | NS               | Putative cytokinin riboside 5'-monophosphate phosphoribohydrolase |            |
| candidate_miRNA_0556 | UAGACGGCAAACUCGUAAACAAAG | 23     | 41        | NS    | NS               | SS1G_03775       | 53              | 1.35E-03          | 0                  | NS               | Hypothetical protein                                              |            |
| candidate_miRNA_0835 | UCGGGGAAAGAUAGAACGAC     | 22     | 28        | NS    | NS               | SS1G_12103       | 94              | 6.76E-04          | 0                  | NS               | Retrovirus-related polymerase                                     |            |
| candidate_miRNA_0659 | UAUGGACAGUAUGUUAUCUCC    | 22     | 28        | 1.38  | down             | SS1G_12056       | 34              | 6.31E-04          | 1                  | NS               | Putative extracellular membrane protein                           |            |
| candidate_miRNA_1287 | UUGGGCGGAGGACAGAAUUUC    | 23     | 21        | 5.47  | down             | SS1G_00122       | 46              | 8.08E-03          | 0                  | NS               | Hypothetical protein                                              |            |
| candidate_miRNA_0466 | UAAUCUUGGACGGAAUUGGAAG   | 23     | 20        | 1.86  | down             | SS1G_01841       | 54              | 6.74E-03          | 0                  | NS               | Hypothetical protein                                              |            |
| cluster_08340        | UAGCGUCAAGCAGGGACUUAAAA  | 24     | 24,422    | 1.77  | down             | SS1G_03032       | 314             | 6.75E-04          | 0                  | NS               | Hypothetical protein                                              |            |
| cluster_21137        | UAACACUCUGAUAGGAGUCGU    | 21     | 10,886    | 1.70  | down             | SS1G_00334       | 736             | 6.75E-04          | 0                  | NS               | Probable Argonaute-2 protein                                      |            |
| cluster_10116        | UGGGGGUCUGUGUUAAUUGAUC   | 23     | 5,870     | 1.68  | down             | SS1G_12812       | 102             | 1.41E-02          | 0                  | 2.59             | Pachytene checkpoint protein 2                                    |            |
| cluster_26575        | CGGAGGUGUGAGGCGUCACACA   | 22     | 2,761     | 1.91  | down             | SS1G_12523       | 123             | 6.73E-03          | 0                  | NS               | Acid--D-amino-acid ligases (peptide synthases).                   |            |
| cluster_06232        | UUUUUUUUUUUUGUCUGAAU     | 20     | 808       | NS    | NS               | SS1G_02664       | 107             | 9.41E-03          | 0                  | NS               | Hypothetical protein                                              |            |
| cluster_14869        | GAUGAUUCUGAGCGUAUUA      | 20     | 387       | 2.15  | down             | SS1G_10754       | 348             | 4.81E-02          | 0                  | NS               | Ribose-phosphate pyrophosphokinase.                               |            |
| cluster_07715        | UUGAUUUAUAGACCUUUGUAUU   | 23     | 199       | 2.69  | down             | SS1G_13405       | 107             | 6.75E-04          | 0                  | NS               | Hypothetical protein                                              |            |

Table S5 Continued

|               |                         |    |     |      |      |            |      |          |   |      |                                                |
|---------------|-------------------------|----|-----|------|------|------------|------|----------|---|------|------------------------------------------------|
| cluster_25295 | UUUGAUUUUGCCUUUGGACUG   | 22 | 179 | NS   | NS   | SS1G_10820 | 127  | 2.34E-02 | 0 | NS   | Hypothetical protein                           |
| cluster_08393 | UGCCGAAUGUAGCUCUUCUGGG  | 22 | 165 | 1.08 | up   | SS1G_01499 | 1139 | 2.14E-02 | 0 | NS   | Cytochrome P450 monooxygenase apf8             |
| cluster_12191 | UAUCAUAAUUUACUGUUGACCU  | 22 | 106 | 4.16 | up   | SS1G_04937 | 24   | 1.27E-02 | 0 | NS   | Hypothetical protein                           |
| cluster_18802 | UCACUGUGACGCCUCACACCU   | 21 | 106 | NS   | NS   | SS1G_05027 | 2176 | 9.41E-03 | 0 | 2.59 | Hypothetical protein                           |
| cluster_21866 | UAGACUGGUUACCUUGGCUAUC  | 23 | 89  | 1.53 | down | SS1G_01849 | 103  | 6.06E-03 | 0 | NS   | Lipase 2-like protein                          |
| cluster_08945 | UGAUGCAUACGGUACGUGCUGA  | 22 | 77  | 1.16 | down | SS1G_09840 | 165  | 3.37E-03 | 0 | NS   | Pyroglutamyl-peptidase I.                      |
| cluster_18095 | AGAUCUGAUGUACUCUGAUC    | 20 | 74  | 1.81 | down | SS1G_04137 | 67   | 3.91E-02 | 0 | 3.15 | Hypothetical protein                           |
| cluster_15735 | UGUACAGAAUGGUUGGUUCGCU  | 22 | 61  | NS   | NS   | SS1G_03983 | 173  | 1.34E-02 | 0 | NS   | Bifunctional polynucleotide phosphatase/kinase |
| cluster_21716 | UUGAGGUGGUUUUAUAACUAAGC | 22 | 47  | NS   | NS   | SS1G_13086 | 773  | 6.75E-04 | 0 | NS   | Hypothetical protein                           |
| cluster_07598 | UAAGUAGGAUUUGAAUAACAUC  | 23 | 46  | 1.04 | down | SS1G_06728 | 57   | 2.02E-03 | 0 | NS   | Efflux pump roqT                               |
| cluster_13250 | GAGGUUGGGUUGGGUUGGGC    | 20 | 45  | NS   | NS   | SS1G_04054 | 83   | 4.29E-02 | 0 | NS   | Histone acetyltransferase.                     |
| cluster_25922 | AAAUCCCCACACUCUCAGGACU  | 22 | 44  | 2.03 | down | SS1G_04240 | 266  | 1.41E-02 | 0 | NS   | Hypothetical protein                           |
| cluster_17538 | UAGGUUUUAGAAUGUAGAUC    | 22 | 39  | NS   | NS   | SS1G_00310 | 340  | 1.81E-02 | 0 | NS   | Xaa-Pro aminopeptidase.                        |
| cluster_26063 | UGUAUUCUCUCGUCAGGAUUG   | 22 | 34  | 1.21 | down | SS1G_13309 | 78   | 6.06E-03 | 0 | NS   | Hypothetical protein                           |
| cluster_10053 | UACCGUGUAGAAUUCUAUGACU  | 22 | 31  | 1.20 | down | SS1G_09144 | 71   | 1.41E-02 | 0 | NS   | Hypothetical protein                           |
| cluster_02494 | UCCCCUCGCAUGAUGAAUUA    | 22 | 28  | 1.22 | up   | SS1G_03220 | 78   | 8.07E-03 | 0 | 1.97 | Hypothetical protein                           |
| cluster_01312 | UAUUUUUAAGGUAUAAGUCU    | 22 | 26  | NS   | NS   | SS1G_02682 | 543  | 3.32E-02 | 0 | NS   | Mannan endo-1,6-beta-mannosidase.              |
